# Supplementary material for: Synthesis and applications of 1-iodo-4-MgCl-1,3-dienes and 1-iodovinyl phenylmagnesium chlorides
Source: Royal Society of Chemistry journal article supplement (doi:10.1039/c4qo00191e), 2014-01-01
Supplement: c4qo00191e1.pdf [file c4qo00191e1.pdf]

*Cover Page for Supporting Information*

***Manuscript Title:***

Synthesis and Applications of 1-Iodo-4-MgCl-1,3-dienes and 1-Iodovinyl Phenylmagnesium Chlorides

***Authors:***

Junnian Wei, Yongliang Zhang, Wen-Xiong Zhang, and Zhenfeng Xi\*

***Affiliations:***

*Beijing National Laboratory for Molecular Science (BNLMS), Key Laboratory of Bioorganic Chemistry and Molecular Engineering of Ministry of Education, College of Chemistry, Peking University, Beijing 100871, China. Key Laboratory of Chemical Biology and Traditional Chinese Medicine Research, Ministry of Education, State Key Laboratory of Organometallic Chemistry, Shanghai Institute of Organic Chemistry, Chinese Academy of Sciences, Shanghai, 200032, China.*

|                                                                                           |            |
|-------------------------------------------------------------------------------------------|------------|
| <b>1) Experimental Details and Characterization Data</b>                                  | <b>S2</b>  |
| <b>2) Copies of <sup>1</sup>H NMR and <sup>13</sup>C NMR spectra of all new compounds</b> | <b>S5</b>  |
| <b>3) References</b>                                                                      | <b>S49</b> |

## 1) Experimental Details and Characterization Data

**General Methods:** All reactions were conducted under a slightly positive pressure of dry nitrogen using standard Schlenk line techniques or under a nitrogen atmosphere in a Mikrouna Super (1220/750) glovebox. The nitrogen in the glovebox was constantly circulated through a copper/molecular sieves catalyst unit. The oxygen and moisture concentrations in the glovebox atmosphere were monitored by an O<sub>2</sub>/H<sub>2</sub>O Combi-Analyzer to ensure both were always below 1 ppm. Unless otherwise noted, all starting materials were commercially available and were used without further purification. Solvents were purified by an Mbraun SPS-800 Solvent Purification System and dried over fresh Na chips in the glove box. <sup>n</sup>BuLi and <sup>t</sup>BuLi were obtained from Acros and J&K. 1,4-Diiodo-1,3-dienes **1** were prepared according to the references.<sup>[11]</sup> <sup>1</sup>H and <sup>13</sup>C NMR spectra were recorded on a Bruker-400 spectrometer (FT, 400 MHz for <sup>1</sup>H; 100 MHz for <sup>13</sup>C) or a Bruker-500 spectrometer (FT, 500 MHz for <sup>1</sup>H; 125 MHz for <sup>13</sup>C) at room temperature, unless otherwise noted. High-resolution mass spectra (HRMS) were recorded on a Bruker Apex IV FTMS mass spectrometer using ESI (electrospray ionization).

**General procedure for I/Mg exchange reaction of 1,4-diiodo-1,3-dienes **1a** and *o*-iodo-2-(2-iodovinyl)benzenes **1b** with Knochel reagent.** 1,4-diiodo-1,3-dienes **1a** (0.8 mmol) in 4 mL of THF was treated with <sup>i</sup>PrMgCl•LiCl (1.6 mmol for **1b**) and the reaction mixture was stirred at room temperature for 6 h (3 h for **1b**). After quenched with aq. HCl or allyl bromide at 0 °C and stirring at room temperature for 4 h, purification by column chromatography (petroleum ether) gave **2a1-5a2** as pure products. Quenched with isopropoxyboronic acid pinacol ester at room temperature overnight, purification by column chromatography (petroleum ether: ethyl acetate = 20 : 1) gave **6a-6b2** as pure products. Quenched with a CO<sub>2</sub> balloon at room temperature for 30 minutes, purification by column chromatography (petroleum ether: ethyl acetate = 10 : 1) gave **7a** and **7b** as pure products.

**2a1**<sup>[2]</sup>: colorless oil, isolated yield 75% (175 mg). <sup>1</sup>H NMR (400MHz, CDCl<sub>3</sub>, 25 °C, TMS): δ = 0.94 (t, 3H, *J* = 7.5 Hz, CH<sub>3</sub>), 0.97-1.04 (m, 6H, CH<sub>3</sub>), 1.09 (t, 3H, *J* = 7.3 Hz, CH<sub>3</sub>), 2.03-2.25 (m, 6H, CH<sub>2</sub>), 2.58 (q, 2H, *J* = 7.3 Hz, CH<sub>2</sub>), 5.06 (t, 1H, *J* = 7.3 Hz, CH) ppm; <sup>13</sup>C NMR (100 MHz, CDCl<sub>3</sub>, 25 °C, TMS): δ = 12.86, 13.44, 14.02, 14.82, 21.08, 22.39, 24.30, 35.01, 106.59, 131.49, 143.98, 149.41 ppm. HRMS: *m/z*: calcd for C<sub>12</sub>H<sub>22</sub>I [M+H]<sup>+</sup>: 293.0761, found 293.0759

**2a2**<sup>[2]</sup>: colorless oil, isolated yield 78% (217 mg). <sup>1</sup>H NMR (400MHz, CDCl<sub>3</sub>, 25 °C, TMS): δ = 0.85-0.97 (m, 12H, CH<sub>3</sub>), 1.33-1.47 (m, 6H, CH<sub>2</sub>), 1.56-1.61 (m, 2H, CH<sub>2</sub>), 2.02-2.18 (m, 6H, CH<sub>2</sub>), 2.53 (t, 2H, *J* = 7.3 Hz, CH<sub>2</sub>), 5.10 (t, 1H, *J* = 7.2 Hz, CH) ppm; <sup>13</sup>C NMR (100 MHz, CDCl<sub>3</sub>, 25 °C, TMS): δ = 13.10, 13.97, 14.23, 14.96, 21.63, 21.88, 22.76, 23.04, 30.00, 31.97, 33.43, 43.11, 105.18, 130.64, 143.97, 149.16 ppm. HRMS: *m/z*: calcd for C<sub>16</sub>H<sub>30</sub>I [M+H]<sup>+</sup>: 349.1387, found 349.1384

**2b**: colorless oil, isolated yield 77% (176 mg). <sup>1</sup>H NMR (400MHz, CDCl<sub>3</sub>, 25 °C, TMS): δ = 0.93 (t, 3H, *J* = 7.5 Hz, CH<sub>3</sub>), 1.16 (t, 3H, *J* = 7.3 Hz, CH<sub>3</sub>), 2.47 (q, 2H, *J* = 7.5 Hz, CH<sub>2</sub>), 2.71 (q, 2H, *J* = 7.3 Hz, CH<sub>2</sub>), 7.06-7.08 (m, 2H, CH), 7.28-7.35 (m, 2H, CH), 7.41-7.60 (m, 1H, CH) ppm; <sup>13</sup>C NMR (100 MHz, CDCl<sub>3</sub>, 25 °C, TMS): δ = 13.23, 14.88, 27.72, 35.12, 107.35, 126.99, 127.27, 128.18, 128.39, 128.86, 147.33, 148.08 ppm. HRMS: *m/z*: calcd for C<sub>12</sub>H<sub>16</sub>I [M+H]<sup>+</sup>: 287.0291, found 287.0288

**4a1**: colorless oil, isolated yield 72% (191 mg). <sup>1</sup>H NMR (400MHz, CDCl<sub>3</sub>, 25 °C, TMS): δ = 0.94-1.12 (m, 12H, CH<sub>3</sub>), 2.00-2.09 (m, 3H, CH<sub>2</sub>), 2.15-2.20 (m, 1H, CH<sub>2</sub>), 2.28-2.34 (m, 1H, CH<sub>2</sub>), 2.41-2.46 (m, 1H, CH<sub>2</sub>), 2.58-2.64 (m, 2H, CH<sub>2</sub>), 2.80-2.84 (m, 2H, CH<sub>2</sub>), 4.98-5.05 (m, 2H, CH<sub>2</sub>), 5.76-5.86 (m, 1H, CH) ppm; <sup>13</sup>C NMR (100 MHz, CDCl<sub>3</sub>, 25 °C, TMS): δ = 12.52, 13.22, 13.32, 14.71, 22.91, 24.21, 25.26, 35.00, 37.80, 108.71, 115.86, 134.03, 137.66, 139.92, 146.81 ppm. HRMS: *m/z*: calcd for C<sub>15</sub>H<sub>26</sub>I [M+H]<sup>+</sup>: 333.1074, found 333.1067 403.1847 403.1856

**4a2**: colorless oil, isolated yield 77% (239 mg). <sup>1</sup>H NMR (400MHz, CDCl<sub>3</sub>, 25 °C, TMS): δ = 0.88-0.96 (m, 12H, CH<sub>3</sub>), 1.42-1.62 (m, 8H, CH<sub>2</sub>), 1.94-2.37 (m, 6H, CH<sub>2</sub>), 2.52-2.56 (m, 2H, CH<sub>2</sub>), 2.78-2.83 (m, 2H, CH<sub>2</sub>), 4.98-5.04 (m, 2H, CH<sub>2</sub>), 5.75-5.85 (m, 1H, CH) ppm; <sup>13</sup>C NMR (100 MHz, CDCl<sub>3</sub>, 25 °C, TMS): δ = 13.24, 14.63, 14.70, 15.17, 21.23, 22.00, 22.04, 23.19, 32.24, 34.24, 35.13, 38.17, 43.02, 107.41, 115.81, 133.00, 137.71, 140.11, 147.14 ppm. HRMS: *m/z*: calcd for C<sub>19</sub>H<sub>34</sub>I [M+H]<sup>+</sup>: 389.1700, found 389.1698

**4a3**: colorless oil, isolated yield 85% (226 mg). <sup>1</sup>H NMR (400MHz, CDCl<sub>3</sub>, 25 °C, TMS): δ = 0.87-0.92 (m, 6H, CH<sub>3</sub>), 1.33-1.44 (m, 8H, CH<sub>2</sub>), 2.09 (br, 2H, CH<sub>2</sub>), 2.19 (t, 2H, *J* = 7.2 Hz, CH<sub>2</sub>), 2.71 (br, 2H, CH<sub>2</sub>), 4.95-5.06 (m, 2H, CH<sub>2</sub>), 5.30 (t, 1H, *J* = 7.2 Hz, CH), 5.79-5.89 (m, 1H, CH), 6.10 (br, 1H, CH) ppm; <sup>13</sup>C NMR (100 MHz, CDCl<sub>3</sub>, 25 °C, TMS): δ = 14.01, 14.13, 22.57, 22.89, 29.87, 30.01, 33.95, 35.30, 37.81, 75.97, 114.96, 124.26, 137.40, 141.45, 152.90 ppm. HRMS: *m/z*: calcd for C<sub>15</sub>H<sub>26</sub>I [M+H]<sup>+</sup>: 333.1074, found 333.1069

**4b**: colorless oil, isolated yield 93% (243 mg). <sup>1</sup>H NMR (400MHz, CDCl<sub>3</sub>, 25 °C, TMS): δ = 0.97 (t, 3H, *J* = 7.6 Hz, CH<sub>3</sub>), 1.18 (t, 3H, *J* = 7.6 Hz, CH<sub>3</sub>), 2.18-2.27 (m, 1H, CH<sub>2</sub>), 2.58-2.78 (m, 3H, CH<sub>2</sub>), 3.23-3.36 (m, 2H, CH<sub>2</sub>), 5.07-5.13 (m, 2H, CH<sub>2</sub>), 5.93-6.03 (m, 1H, CH), 6.91-6.93 (m, 1H, CH), 7.18-7.25 (m, 3H, CH) ppm; <sup>13</sup>C NMR (100 MHz, CDCl<sub>3</sub>, 25 °C, TMS): δ = 13.11, 14.85, 27.41, 34.74, 36.96, 109.32, 116.24, 126.07, 127.33, 128.91, 129.28, 136.48, 137.41, 146.42, 147.08 ppm. HRMS: *m/z*: calcd for C<sub>15</sub>H<sub>20</sub>I [M+H]<sup>+</sup>: 327.0604, found 327.0598

**5a1**: colorless oil, isolated yield 74% (205 mg). <sup>1</sup>H NMR (400MHz, CDCl<sub>3</sub>, 25 °C, TMS): δ = 0.98-1.12 (m, 12H, CH<sub>3</sub>), 1.66 (s, 3H, CH<sub>3</sub>), 1.91-1.96 (m, 1H, CH<sub>2</sub>), 2.12-2.23 (m, 3H, CH<sub>2</sub>), 2.28-2.34 (m, 2H, CH<sub>2</sub>), 2.59 (q, 2H, *J* = 7.2 Hz, CH<sub>2</sub>), 2.71-2.84 (m, 2H, CH<sub>2</sub>), 4.67 (s, 1H, CH<sub>2</sub>), 4.77 (s, 1H, CH<sub>2</sub>) ppm; <sup>13</sup>C NMR (100 MHz, CDCl<sub>3</sub>, 25 °C, TMS): δ = 12.62, 13.31, 13.60, 14.78, 23.09,

23.43, 24.55, 25.91, 34.95, 40.81, 109.00, 111.75, 133.48, 141.77, 144.84, 146.78 ppm. HRMS:  $m/z$ : calcd for  $C_{16}H_{28}I$   $[M+H]^+$ : 347.1230, found 347.1225

**5a2**: colorless oil, isolated yield 92% (255 mg).  $^1H$  NMR (400MHz,  $CDCl_3$ , 25 °C, TMS):  $\delta$  = 0.86-0.93 (m, 6H,  $CH_3$ ), 1.30-1.43 (m, 8H,  $CH_2$ ), 1.74 (s, 3H,  $CH_3$ ), 2.11-2.20 (m, 4H,  $CH_2$ ), 2.66 (br, 2H,  $CH_2$ ), 4.71-4.72 (m, 2H,  $CH_2$ ), 5.36 (t, 1H,  $J$  = 7.2 Hz, CH), 6.08 (s, 1H, CH) ppm;  $^{13}C$  NMR (100 MHz,  $CDCl_3$ , 25 °C, TMS):  $\delta$  = 13.99, 14.14, 22.59, 22.89, 23.27, 29.92, 29.94, 35.34, 37.55, 37.84, 75.83, 110.34, 124.27, 141.83, 145.28, 152.94 ppm. HRMS:  $m/z$ : calcd for  $C_{16}H_{28}I$   $[M+H]^+$ : 347.1230, found 347.1228

**5b1**: colorless oil, isolated yield 93% (253 mg).  $^1H$  NMR (400MHz,  $CDCl_3$ , 25 °C, TMS):  $\delta$  = 0.97 (t, 3H,  $J$  = 7.4 Hz,  $CH_3$ ), 1.17 (t, 3H,  $J$  = 7.6 Hz,  $CH_3$ ), 1.72 (s, 3H,  $CH_3$ ), 2.10-2.19 (m, 1H,  $CH_2$ ), 2.65-2.77 (m, 3H,  $CH_2$ ), 3.254 (d, 2H,  $J$  = 3.2 Hz,  $CH_2$ ), 4.73 (s, 1H,  $CH_2$ ), 4.88 (s, 1H,  $CH_2$ ), 6.93 (d, 1H,  $J$  = 7.3 Hz, CH), 7.18-7.25 (m, 3H, CH) ppm;  $^{13}C$  NMR (100 MHz,  $CDCl_3$ , 25 °C, TMS):  $\delta$  = 13.18, 14.84, 22.89, 27.17, 34.75, 40.97, 109.11, 113.20, 125.99, 127.22, 129.16, 129.30, 135.81, 144.54, 146.86, 147.22 ppm. HRMS:  $m/z$ : calcd for  $C_{16}H_{22}I$   $[M+H]^+$ : 341.0761, found 341.0758

**5b2**: colorless oil, isolated yield 67% (198 mg).  $^1H$  NMR (400MHz,  $CDCl_3$ , 25 °C, TMS):  $\delta$  = 0.37 (s, 9H,  $CH_3$ ), 1.71 (s, 3H,  $CH_3$ ), 2.15 (s, 3H,  $CH_3$ ), 3.20-3.32 (m, 2H,  $CH_2$ ), 4.71 (s, 1H,  $CH_2$ ), 4.86 (s, 1H,  $CH_2$ ), 6.88-6.92 (m, 1H, CH), 7.22-7.25 (m, 3H, CH) ppm;  $^{13}C$  NMR (100 MHz,  $CDCl_3$ , 25 °C, TMS):  $\delta$  = 1.96, 22.85, 24.87, 41.17, 108.50, 113.00, 126.65, 126.68, 127.14, 129.69, 134.28, 144.57, 150.41, 156.83 ppm. HRMS:  $m/z$ : calcd for  $C_{16}H_{24}ISi$   $[M+H]^+$ : 371.0686, found 371.0681

**6a**: colorless oil, isolated yield 70% (234 mg).  $^1H$  NMR (400MHz,  $CDCl_3$ , 25 °C, TMS):  $\delta$  = 0.98-1.03 (m, 6H,  $CH_3$ ), 1.05 (t, 2H,  $J$  = 7.0 Hz,  $CH_3$ ), 1.10 (t, 2H,  $J$  = 7.3 Hz,  $CH_3$ ), 1.22 (s, 12H,  $CH_3$ ), 2.06-2.24 (m, 4H,  $CH_2$ ), 2.36-2.46 (m, 2H,  $CH_2$ ), 2.57 (q, 2H,  $J$  = 7.3 Hz,  $CH_2$ ) ppm;  $^{13}C$  NMR (100 MHz,  $CDCl_3$ , 25 °C, TMS):  $\delta$  = 12.78, 13.27, 14.00, 14.49, 23.69, 24.78, 25.02, 25.11, 25.47, 34.99, 82.66, 106.11, 148.36, 157.71 ppm. HRMS:  $m/z$ : calcd for  $C_{18}H_{33}BiO_2$   $[M+H]^+$ : 419.1613, found 419.1614

**6b1**: colorless oil, isolated yield 80% (262 mg).  $^1H$  NMR (400MHz,  $CDCl_3$ , 25 °C, TMS):  $\delta$  = 0.95 (t, 3H,  $J$  = 7.6 Hz,  $CH_3$ ), 1.18 (t, 3H,  $J$  = 7.6 Hz,  $CH_3$ ), 1.30 (s, 12H,  $CH_3$ ), 2.32-2.41 (m, 1H,  $CH_2$ ), 2.53-2.69 (m, 2H,  $CH_2$ ), 2.77-2.86 (m, 1H,  $CH_2$ ), 6.95-6.97 (m, 1H, CH), 7.24-7.29 (m, 1H, CH), 7.39-7.43 (m, 1H, CH) 7.83-7.85 (m, 1H, CH) ppm;  $^{13}C$  NMR (100 MHz,  $CDCl_3$ , 25 °C, TMS):  $\delta$  = 12.95, 13.99, 24.98, 25.05, 27.94, 34.87, 83.44, 106.50, 126.19, 128.44, 130.64, 135.87, 148.87, 153.73 ppm. HRMS:  $m/z$ : calcd for  $C_{18}H_{27}BiO_2$   $[M+H]^+$ : 413.1143, found 413.1135

**6b2**: colorless oil, isolated yield 92% (273 mg).  $^1H$  NMR (400MHz,  $CDCl_3$ , 25 °C, TMS):  $\delta$  = 1.31 (s, 12H,  $CH_3$ ), 2.22 (s, 3H,  $CH_3$ ), 6.14 (s, 1H, CH), 7.01-7.03 (m, 1H, CH), 7.28-7.32 (m, 1H, CH), 7.44-7.47 (m, 1H, CH), 7.80-7.82 (m, 1H, CH) ppm;  $^{13}C$  NMR (100 MHz,  $CDCl_3$ , 25 °C, TMS):  $\delta$  = 24.95, 27.10, 75.98, 83.66, 126.73, 127.12, 131.12, 135.61, 150.64, 151.54 ppm. HRMS:  $m/z$ : calcd for  $C_{15}H_{21}BiO_2$   $[M+H]^+$ : 371.0674, found 371.0671

**7a**: colorless oil, isolated yield 45% (121 mg).  $^1H$  NMR (400MHz,  $CDCl_3$ , 25 °C, TMS):  $\delta$  = 1.03-1.15 (m, 12H,  $CH_3$ ), 2.25-2.69 (m, 8H,  $CH_2$ ) ppm;  $^{13}C$  NMR (100 MHz,  $CDCl_3$ , 25 °C, TMS):  $\delta$  = 12.32, 13.29, 13.34, 13.65, 22.43, 26.01, 26.41, 34.68, 104.77, 130.64, 146.63, 156.63, 173.49 ppm. HRMS:  $m/z$ : calcd for  $C_{13}H_{22}IO_2$   $[M+H]^+$ : 337.0659, found 337.0660

**7b**: colorless solid, isolated yield 85% (224 mg).  $^1H$  NMR (400MHz,  $CDCl_3$ , 25 °C, TMS):  $\delta$  = 0.97 (t, 3H,  $J$  = 7.6 Hz,  $CH_3$ ), 1.16 (t, 3H,  $J$  = 7.4 Hz,  $CH_3$ ), 2.26-2.35 (m, 1H,  $CH_2$ ), 2.55-2.64 (m, 1H,  $CH_2$ ), 2.73-2.86 (m, 2H,  $CH_2$ ), 7.08-7.10 (m, 1H, CH), 7.38-7.42 (m, 1H, CH), 7.55-7.59 (m, 1H, CH), 8.12-8.14 (m, 1H, CH) ppm;  $^{13}C$  NMR (100 MHz,  $CDCl_3$ , 25 °C, TMS):  $\delta$  = 13.11, 13.98, 27.34, 34.64, 106.11, 127.37, 128.87, 130.97, 131.64, 133.07, 147.77, 149.37, 172.05 ppm. HRMS:  $m/z$ : calcd for  $C_{13}H_{16}IO_2$   $[M+H]^+$ : 331.0189, found 331.0192

**General procedure for intramolecular Heck reactions of 1-iodo-1,3-dienes analogues.** 1-Iodo-1,3-dienes analogues (0.4 mmol) in 4 mL of toluene was treated with  $Pd(OAc)_2$  (0.04 mmol),  $Et_3N$  (1.2 mmol) and  $PPh_3$  (0.08 mmol). The reaction mixture was stirred at 100 °C for 12 h based on the structures. Generally a longer reaction time has little effect on the Heck reaction. After purification by column chromatography, the corresponding products were given as pure compounds.

**8a1**: colorless oil, isolated yield 94% (77 mg).  $^1H$  NMR (400MHz,  $CDCl_3$ , 25 °C, TMS):  $\delta$  = 1.12-1.24 (m, 12H,  $CH_3$ ), 2.29 (s, 3H,  $CH_3$ ), 2.60-2.68 (m, 8H,  $CH_2$ ), 6.86 (s, 1H, CH) ppm;  $^{13}C$  NMR (100 MHz,  $CDCl_3$ , 25 °C, TMS):  $\delta$  = 14.74, 15.77, 15.81, 16.12, 19.85, 21.85, 22.15, 22.59, 25.71, 128.67, 133.71, 137.63, 138.23, 139.49, 139.89 ppm. HRMS:  $m/z$ : calcd for  $C_{15}H_{25}$   $[M+H]^+$ : 205.1951, found 205.1949

**8a2**: colorless oil, isolated yield 99% (103 mg).  $^1H$  NMR (400MHz,  $CDCl_3$ , 25 °C, TMS):  $\delta$  = 0.98-1.06 (m, 12H,  $CH_3$ ), 1.47-1.52 (m, 6H,  $CH_2$ ), 1.56-1.62 (m, 2H,  $CH_2$ ), 2.25 (s, 3H,  $CH_3$ ), 2.48-2.56 (m, 8H,  $CH_2$ ), 6.82 (s, 1H, CH) ppm;  $^{13}C$  NMR (100 MHz,  $CDCl_3$ , 25 °C, TMS):  $\delta$  = 14.71, 15.11, 15.16, 15.24, 20.00, 23.85, 24.93, 24.98, 25.22, 31.70, 32.11, 32.31, 35.38, 129.30, 133.56, 136.61, 137.08, 138.22, 138.99 ppm. HRMS:  $m/z$ : calcd for  $C_{19}H_{33}$   $[M+H]^+$ : 261.2577, found 261.2573

**8b**: colorless oil, isolated yield 95% (76 mg).  $^1H$  NMR (400MHz,  $CDCl_3$ , 25 °C, TMS):  $\delta$  = 1.99 (t, 3H,  $J$  = 7.6 Hz,  $CH_3$ ), 1.29 (t, 3H,  $J$  = 7.6 Hz,  $CH_3$ ), 2.48 (s, 3H,  $CH_3$ ), 2.82 (q, 2H,  $J$  = 7.6 Hz,  $CH_2$ ), 3.11 (q, 2H,  $J$  = 7.6 Hz,  $CH_2$ ), 7.33-7.42 (m, 2H, CH), 7.48

(s, 1H, CH), 7.69 (d, 1H,  $J = 7.8$  Hz, CH), 7.97 (d, 1H,  $J = 8.3$  Hz, CH) ppm;  $^{13}\text{C}$  NMR (100 MHz,  $\text{CDCl}_3$ , 25 °C, TMS):  $\delta = 14.86, 15.66, 20.76, 21.61, 22.92, 123.96, 124.72, 125.07, 127.02, 127.99, 130.96, 132.74, 134.87, 136.94, 138.51$  ppm. HRMS:  $m/z$ : calcd for  $\text{C}_{15}\text{H}_{19}$   $[\text{M}+\text{H}]^+$ : 199.1481, found 199.1479

**9a1**: colorless oil, isolated yield 80% (70 mg).  $^1\text{H}$  NMR (400MHz,  $\text{CDCl}_3$ , 25 °C, TMS):  $\delta = 0.72$  (t, 3H,  $J = 7.4$  Hz,  $\text{CH}_3$ ), 0.99 (t, 3H,  $J = 7.4$  Hz,  $\text{CH}_3$ ), 1.03-1.11 (m, 6H,  $\text{CH}_3$ ), 1.14-1.19 (m, 2H,  $\text{CH}_2$ ), 1.95 (s, 3H,  $\text{CH}_3$ ), 2.04-2.23 (m, 6H,  $\text{CH}_2$ ), 2.60 (t, 1H,  $J = 8.4$  Hz, CH) 5.70 (s, 1H, CH), 6.02 (s, 1H, CH) ppm;  $^{13}\text{C}$  NMR (100 MHz,  $\text{CDCl}_3$ , 25 °C, TMS):  $\delta = 12.44, 13.01, 13.77, 15.44, 19.93, 25.01, 27.19, 29.74, 33.05, 50.20, 121.60, 129.02, 132.16, 133.69, 134.88, 143.20$  ppm. HRMS:  $m/z$ : calcd for  $\text{C}_{16}\text{H}_{27}$   $[\text{M}+\text{H}]^+$ : 219.2107, found 219.2105

**9a2**: colorless oil, isolated yield 74% (64 mg).  $^1\text{H}$  NMR (400MHz,  $\text{CDCl}_3$ , 25 °C, TMS):  $\delta = 0.83$ -0.90 (m, 6H,  $\text{CH}_3$ ), 1.17-1.37 (m, 8H,  $\text{CH}_2$ ), 1.94 (s, 3H,  $\text{CH}_3$ ), 2.15-2.18 (m, 4H,  $\text{CH}_2$ ), 2.32 (t, 2H,  $J = 7.2$  Hz,  $\text{CH}_2$ ), 5.23 (t, 1H,  $J = 7.2$  Hz, CH), 5.73 (d, 1H,  $J = 5.2$  Hz, CH), 6.22 (d, 1H,  $J = 5.4$  Hz, CH) ppm;  $^{13}\text{C}$  NMR (100 MHz,  $\text{CDCl}_3$ , 25 °C, TMS):  $\delta = 14.13, 14.14, 22.58, 22.61, 32.87, 32.03, 32.96, 33.43, 33.59, 36.24, 119.11, 121.07, 128.13, 135.33, 138.81, 143.65$  ppm. HRMS:  $m/z$ : calcd for  $\text{C}_{16}\text{H}_{27}$   $[\text{M}+\text{H}]^+$ : 219.2107, found 219.2106

**9b1**: colorless oil, isolated yield 55% (46 mg).  $^1\text{H}$  NMR (400MHz,  $\text{CDCl}_3$ , 25 °C, TMS):  $\delta = 0.15$  (d, 1H,  $J = 4.3$  Hz,  $\text{CH}_2$ ), 0.46 (d, 1H,  $J = 4.0$  Hz,  $\text{CH}_2$ ), 1.02-1.05 (m, 4H,  $\text{CH}_3+\text{CH}_2$ ), 1.08-1.14 (m, 1H,  $\text{CH}_2$ ), 1.30 (s, 3H,  $\text{CH}_3$ ), 1.88 (d, 3H,  $J = 7.1$  Hz,  $\text{CH}_3$ ), 2.70 (d, 1H,  $J = 15.4$  Hz,  $\text{CH}_2$ ), 2.87 (d, 1H,  $J = 15.3$  Hz,  $\text{CH}_2$ ), 5.61 (q, 1H,  $J = 7.0$  Hz, CH), 7.03-7.06 (m, 1H, CH), 7.12-7.17 (m, 2H, CH), 7.21-7.23 (m, 1H, CH) ppm;  $^{13}\text{C}$  NMR (100 MHz,  $\text{CDCl}_3$ , 25 °C, TMS):  $\delta = 11.77, 16.18, 20.90, 21.99, 23.73, 23.77, 32.28, 39.17, 118.04, 125.37, 126.70, 127.82, 128.94, 135.78, 137.33, 138.90$  ppm. HRMS:  $m/z$ : calcd for  $\text{C}_{16}\text{H}_{21}$   $[\text{M}+\text{H}]^+$ : 213.1638, found 213.1635

**9b2**: colorless oil, isolated yield 70% (67 mg).  $^1\text{H}$  NMR (400MHz,  $\text{CDCl}_3$ , 25 °C, TMS):  $\delta = 0.12$  (s, 9H,  $\text{CH}_3$ ), 0.75 (d, 1H,  $J = 4.2$  Hz,  $\text{CH}_2$ ), 0.84 (d, 1H,  $J = 4.2$  Hz,  $\text{CH}_2$ ), 1.32 (s, 3H,  $\text{CH}_3$ ), 2.58 (d, 1H,  $J = 15.3$  Hz,  $\text{CH}_2$ ), 2.82 (d, 1H,  $J = 15.3$  Hz,  $\text{CH}_2$ ), 5.11 (s, 1H, CH) 5.24 (s, 1H, CH), 7.02-7.04 (m, 1H, CH), 7.16-7.18 (m, 2H, CH), 7.24-7.26 (m, 1H, CH) ppm;  $^{13}\text{C}$  NMR (100 MHz,  $\text{CDCl}_3$ , 25 °C, TMS):  $\delta = 0.94, 21.29, 22.82, 24.44, 25.03, 40.13, 112.75, 125.30, 126.60, 127.02, 127.26, 136.96, 140.03, 150.26$  ppm. HRMS:  $m/z$ : calcd for  $\text{C}_{16}\text{H}_{23}\text{Si}$   $[\text{M}+\text{H}]^+$ : 243.1564, found 243.1563

**Procedure for synthesis of 10**. Compound **6b2** (0.4 mmol) in 4 mL of toluene was treated with  $\text{PdCl}_2(\text{PPh}_3)_2$  (0.02 mmol),  $\text{Et}_3\text{N}$  (1.6 mmol) and  $\text{Ph}_2\text{PH}$  (0.5 mmol, 10 wt.% in hexane). The reaction mixture was stirred at 100 °C for 12 h. After purification by column chromatography, **10** was obtained.

**10**: colorless solid, isolated yield 73% (125 mg).  $^1\text{H}$  NMR (400MHz,  $\text{CDCl}_3$ , 25 °C, TMS):  $\delta = 1.25$  (s, 12H,  $\text{CH}_3$ ), 2.26 (s, 3H,  $\text{CH}_3$ ), 6.22 (br, 1H, CH), 7.02 (d, 1H,  $J = 7.5$  Hz, CH), 7.27-7.39 (m, 12H, CH), 7.84 (d, 1H,  $J = 7.3$  Hz, CH) ppm;  $^{13}\text{C}$  NMR (100 MHz,  $\text{CDCl}_3$ , 25 °C, TMS):  $\delta = 24.92, 29.44$  (d,  $J = 6.7$  Hz), 83.58, 124.82 (d,  $J = 5.6$  Hz), 126.48, 127.90, 128.21 (d,  $J = 6.2$  Hz), 128.58, 128.64 (d,  $J = 2.8$  Hz), 128.83, 130.59, 132.71 (d,  $J = 18.4$  Hz), 133.86 (d,  $J = 19.5$  Hz), 135.90, 140.80 (d,  $J = 10.7$  Hz), 149.46 (d,  $J = 8.8$  Hz), 158.28 (d,  $J = 29.8$  Hz) ppm. HRMS:  $m/z$ : calcd for  $\text{C}_{27}\text{H}_{31}\text{BO}_2\text{P}$   $[\text{M}+\text{H}]^+$ : 429.2149, found 429.2150

**X-ray crystallographic studies**: The single crystals of **10** suitable for X-ray analysis were grown as shown in were grown in mixed solvent of hexane and ethanol for 1 day. Data collections for **10** was performed at 180 K on a SuperNova diffractometer, using graphite-monochromated Mo  $K\alpha$  radiation ( $\lambda = 0.71073$  Å). The structure was solved with the shelxs-97<sup>[31]</sup> and refined with the XL refinement package using Least Squares minimization. Refinement was performed on  $F^2$  anisotropically for all the non-hydrogen atoms by the full-matrix least-squares method. The hydrogen atoms were placed at the calculated positions and were included in the structure calculation without further refinement of the parameters. Crystal data, data collection and processing parameters for compound **10** are summarized in Supporting Information. Crystallographic data (excluding structure factors) have been deposited with the Cambridge Crystallographic Data Centre as supplementary publication nos. CCDC-1011067 (**10**). Copies of these data can be obtained free of charge from the Cambridge Crystallographic Data Centre via [www.ccdc.cam.ac.uk/data\\_request/cif](http://www.ccdc.cam.ac.uk/data_request/cif).

2) Copies of  $^1\text{H}$  NMR and  $^{13}\text{C}$  NMR spectra of all new compounds

2b

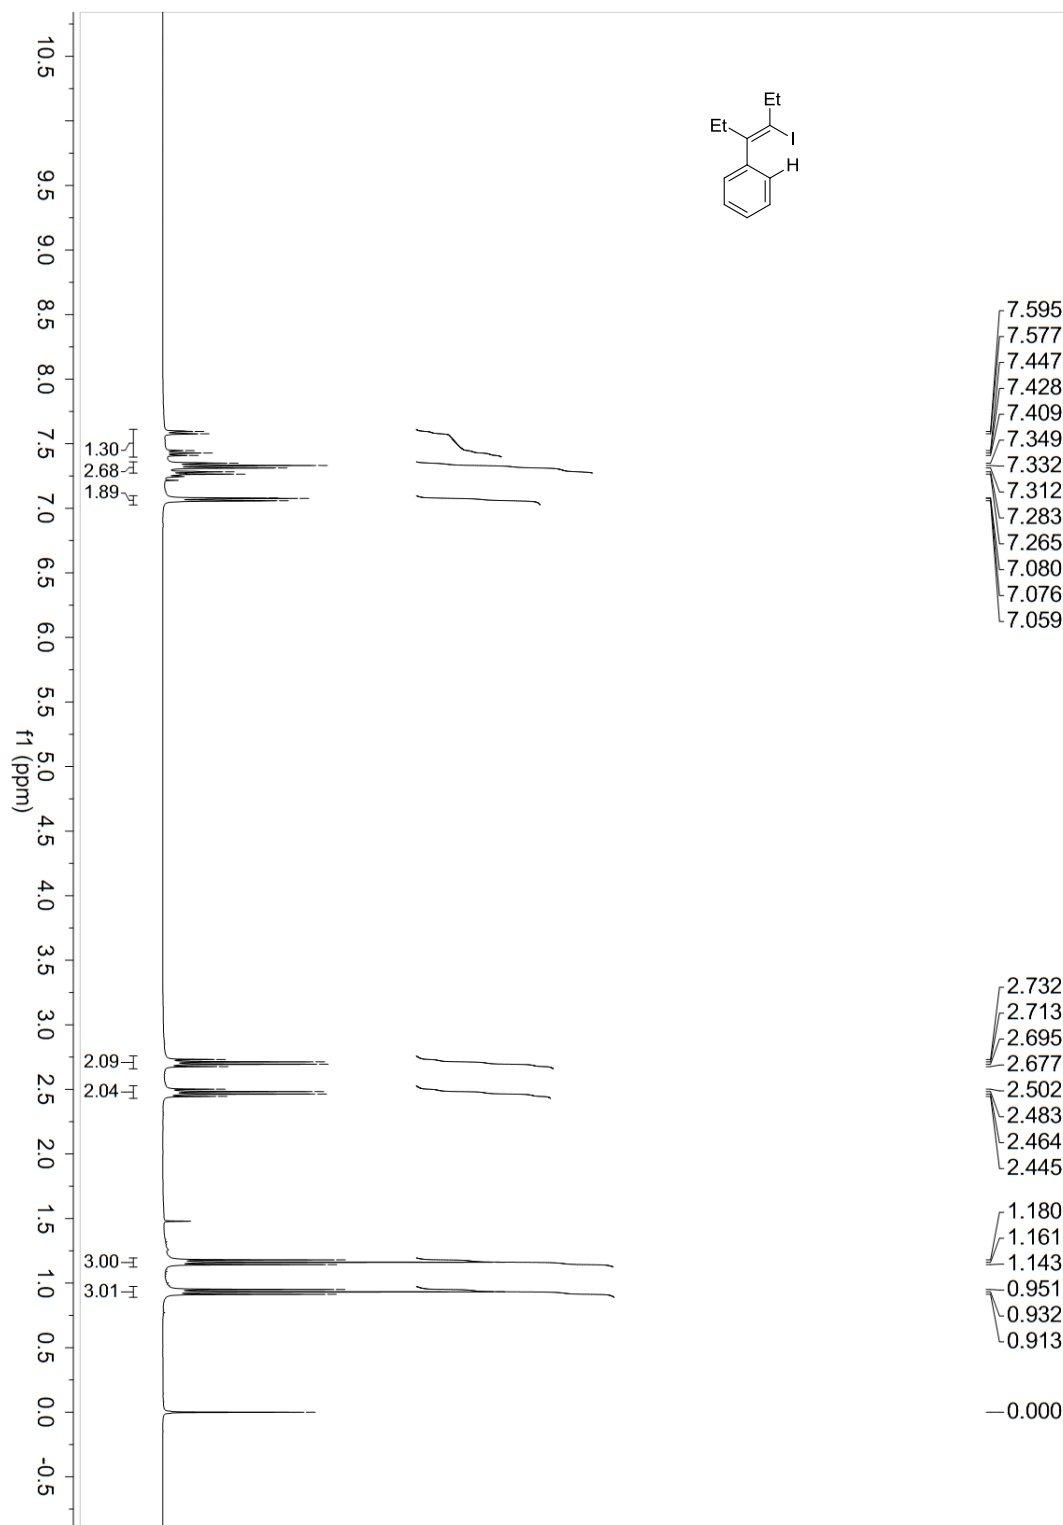

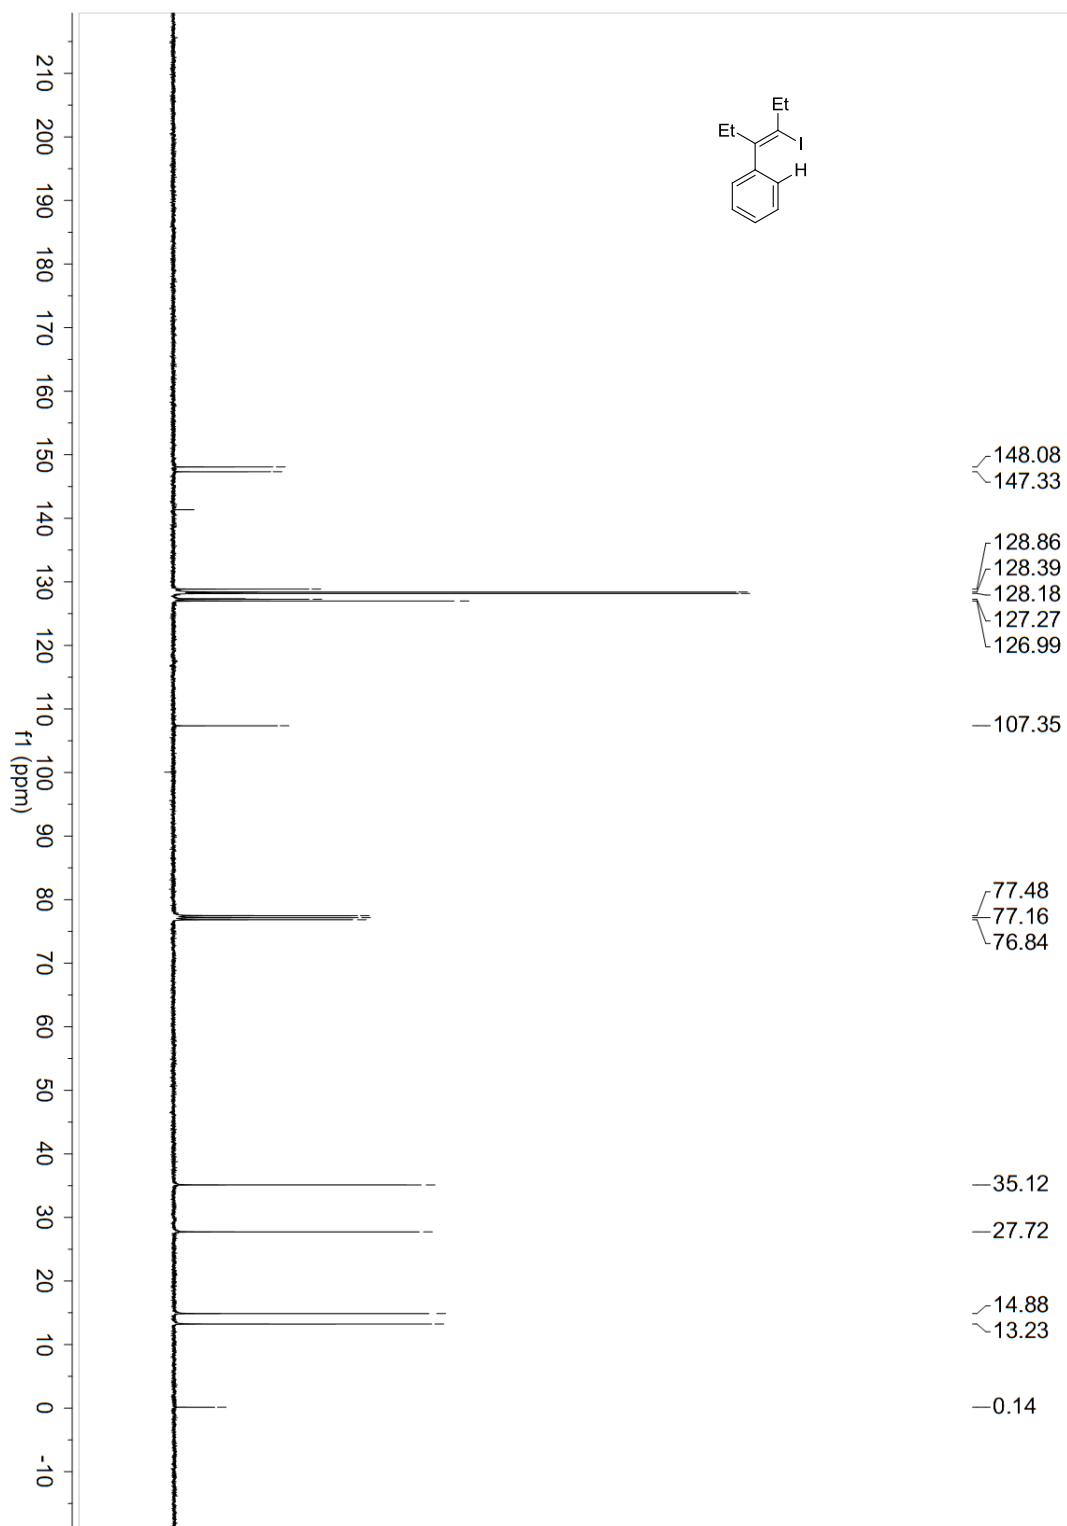

4a1

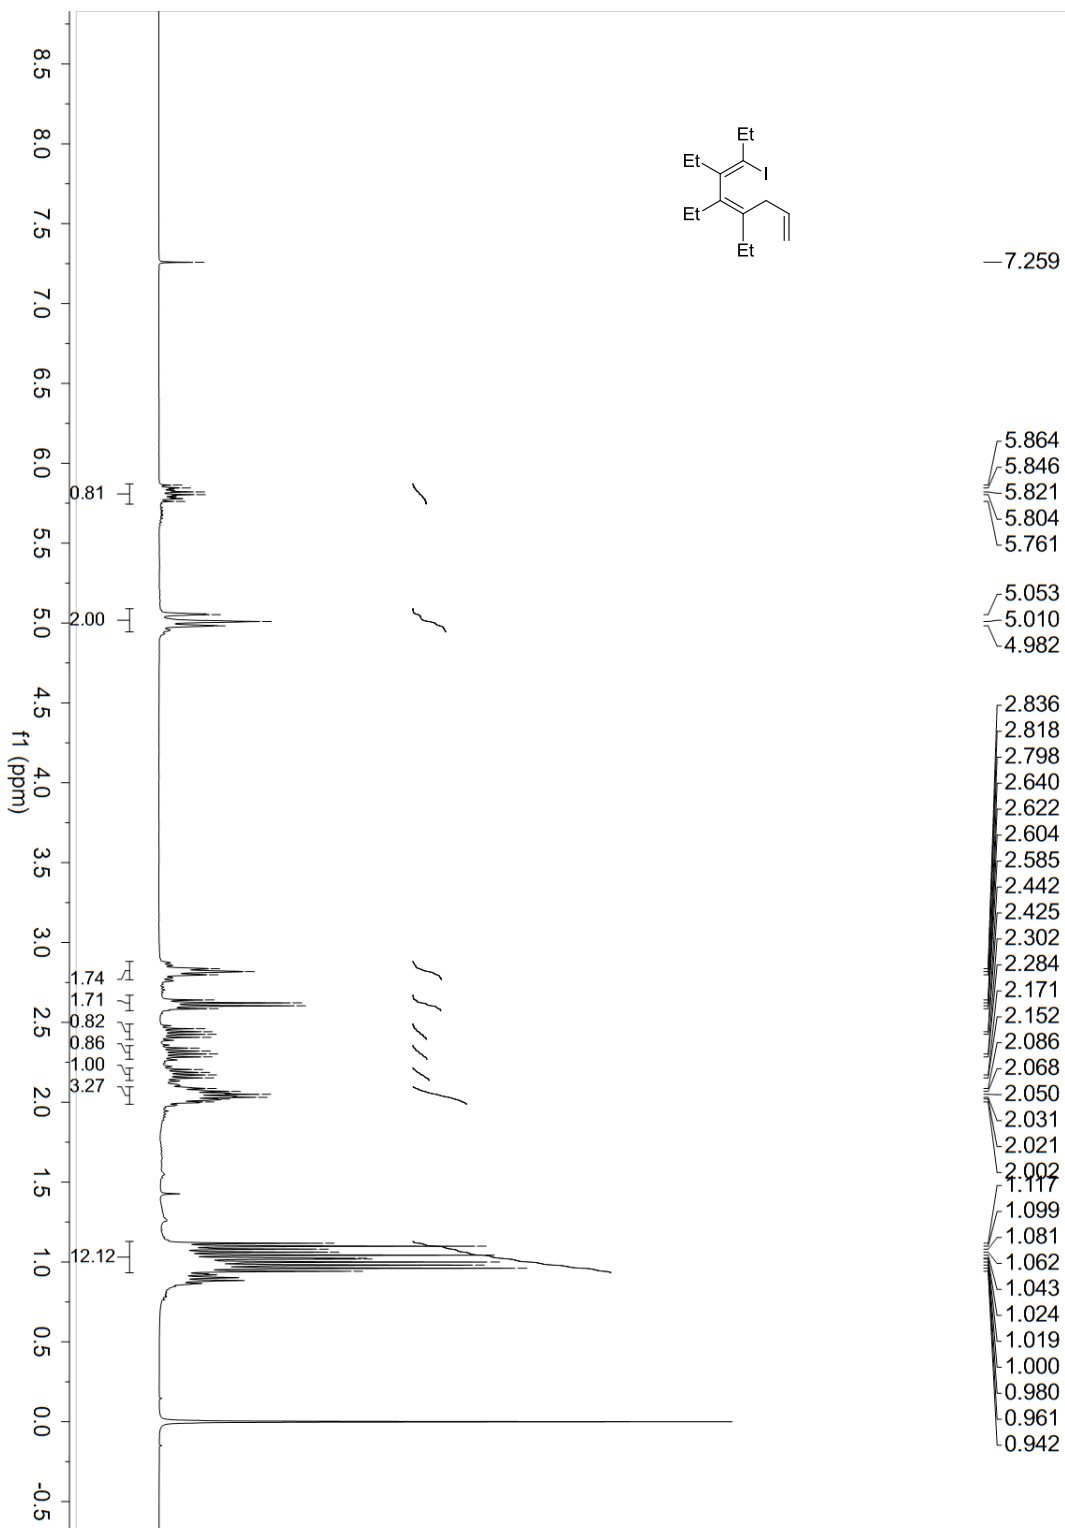

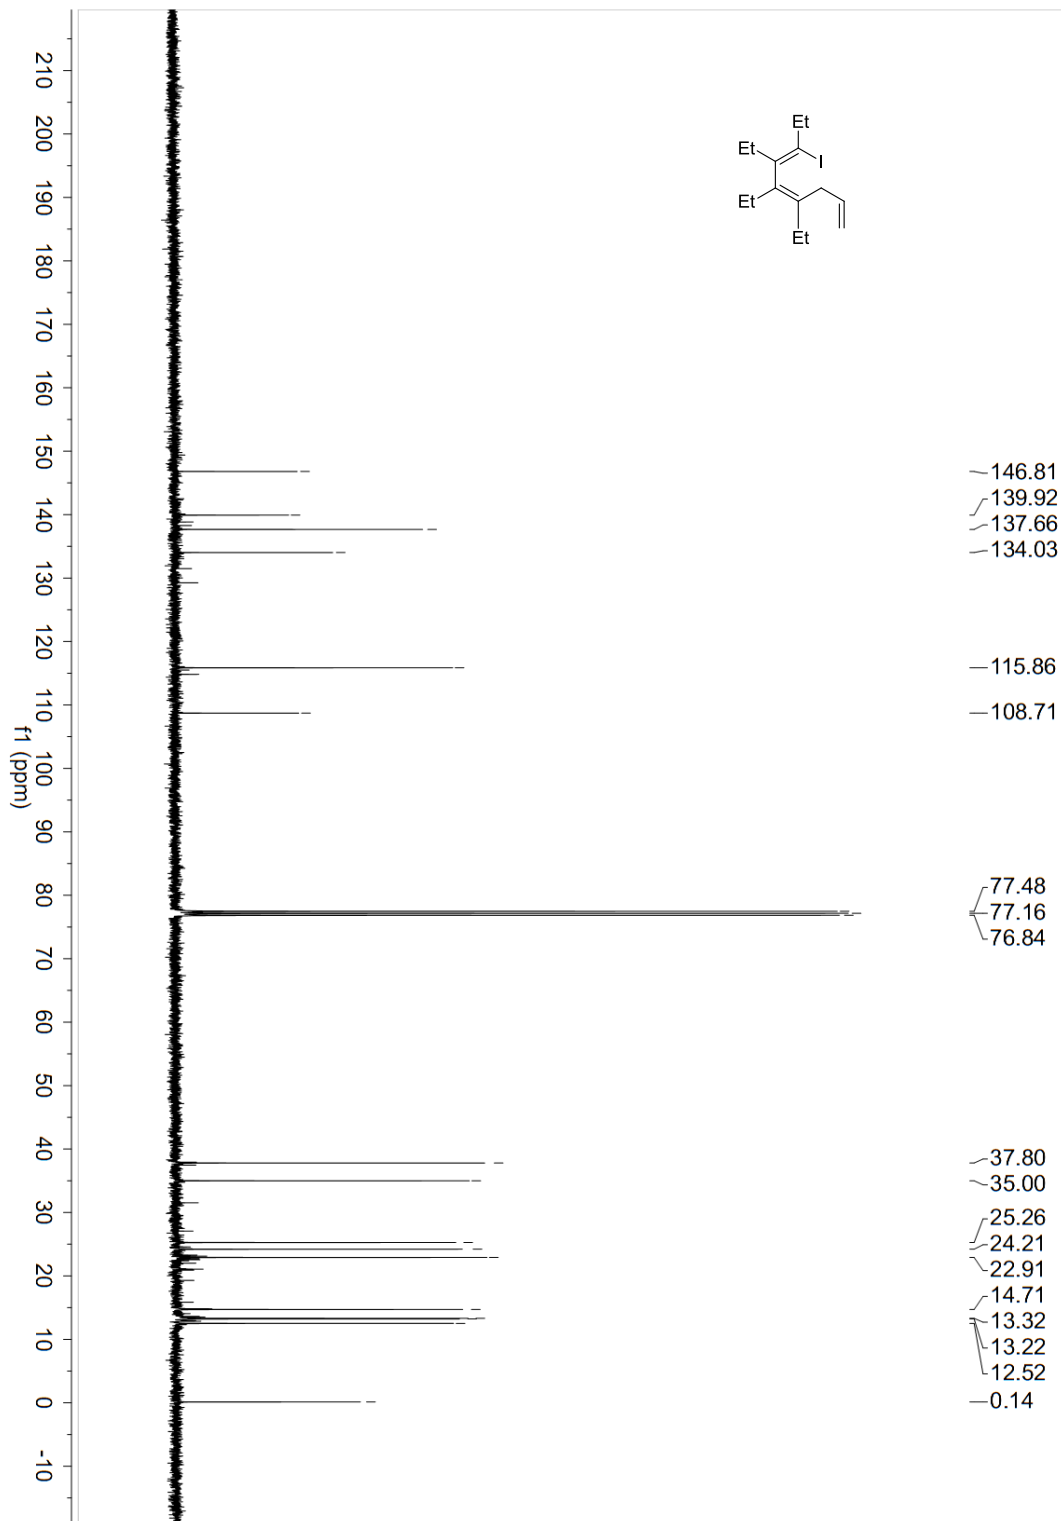







4a3

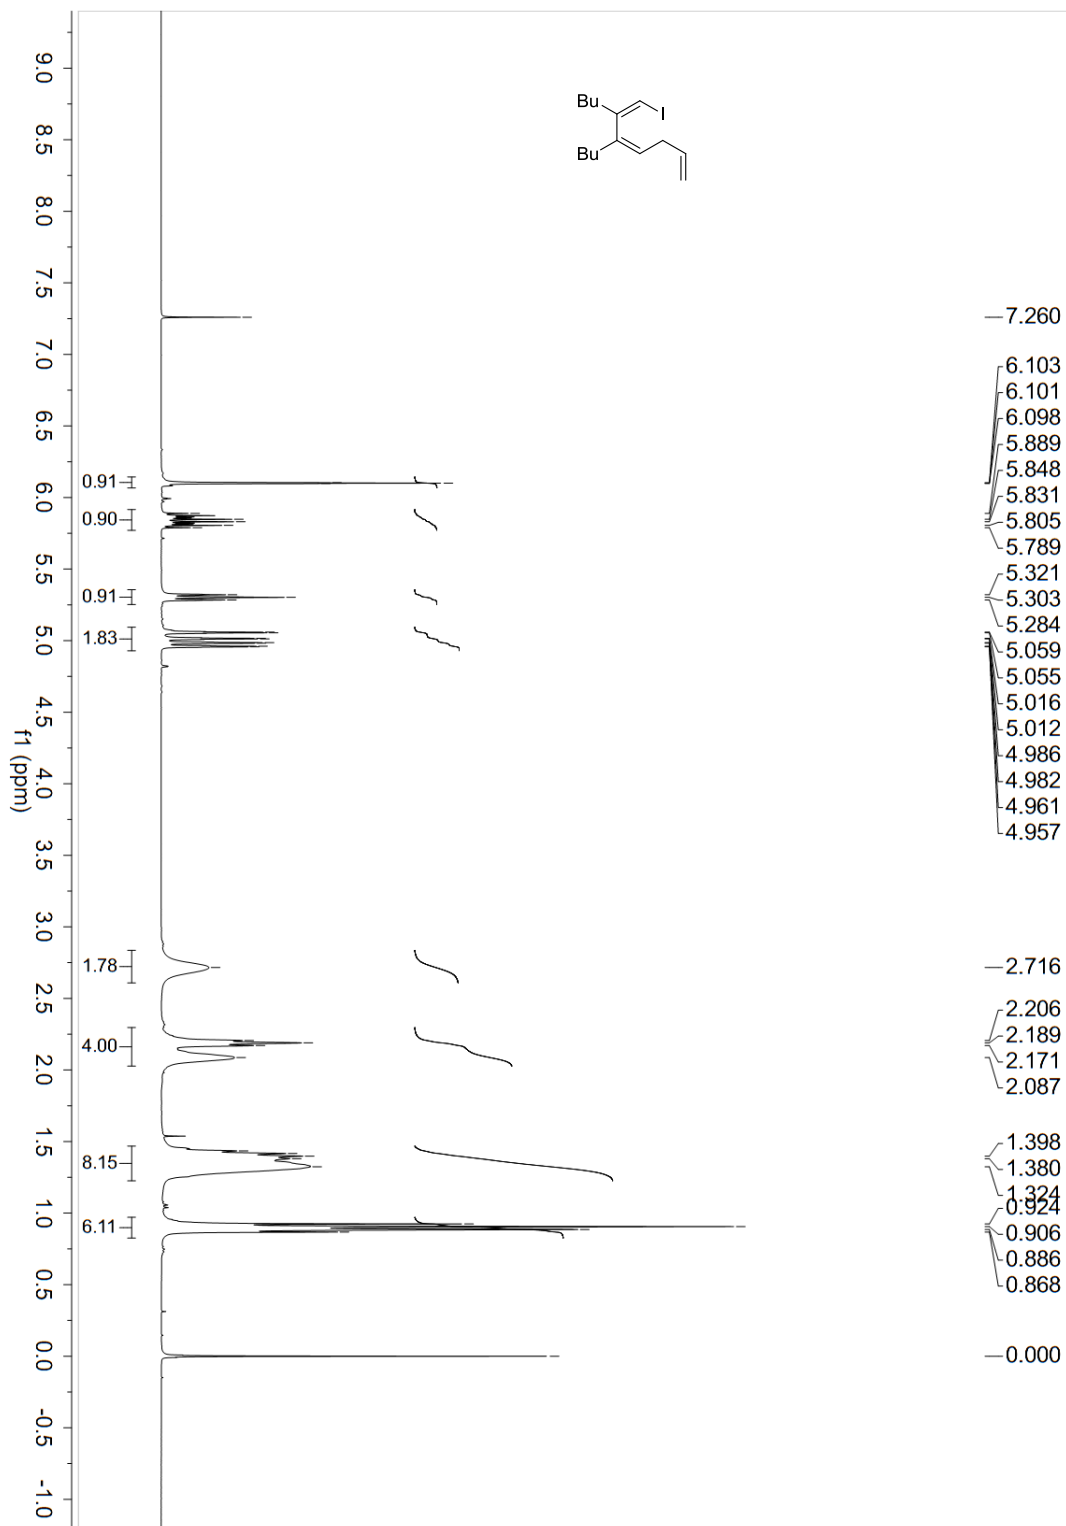

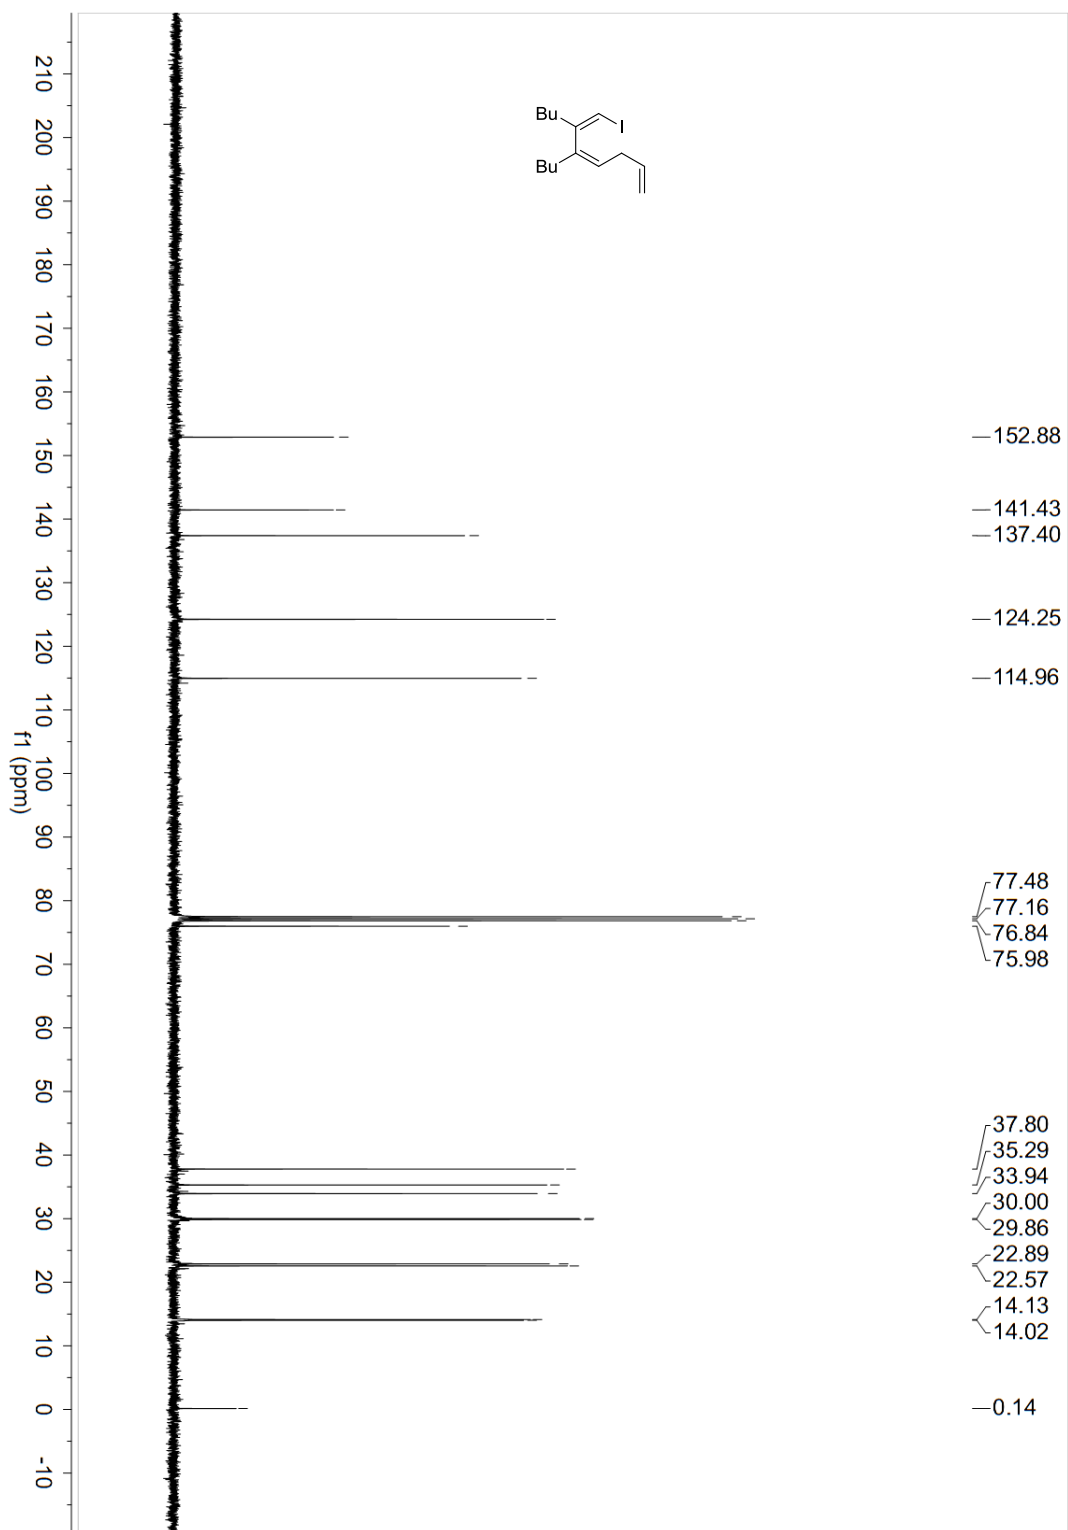

4b

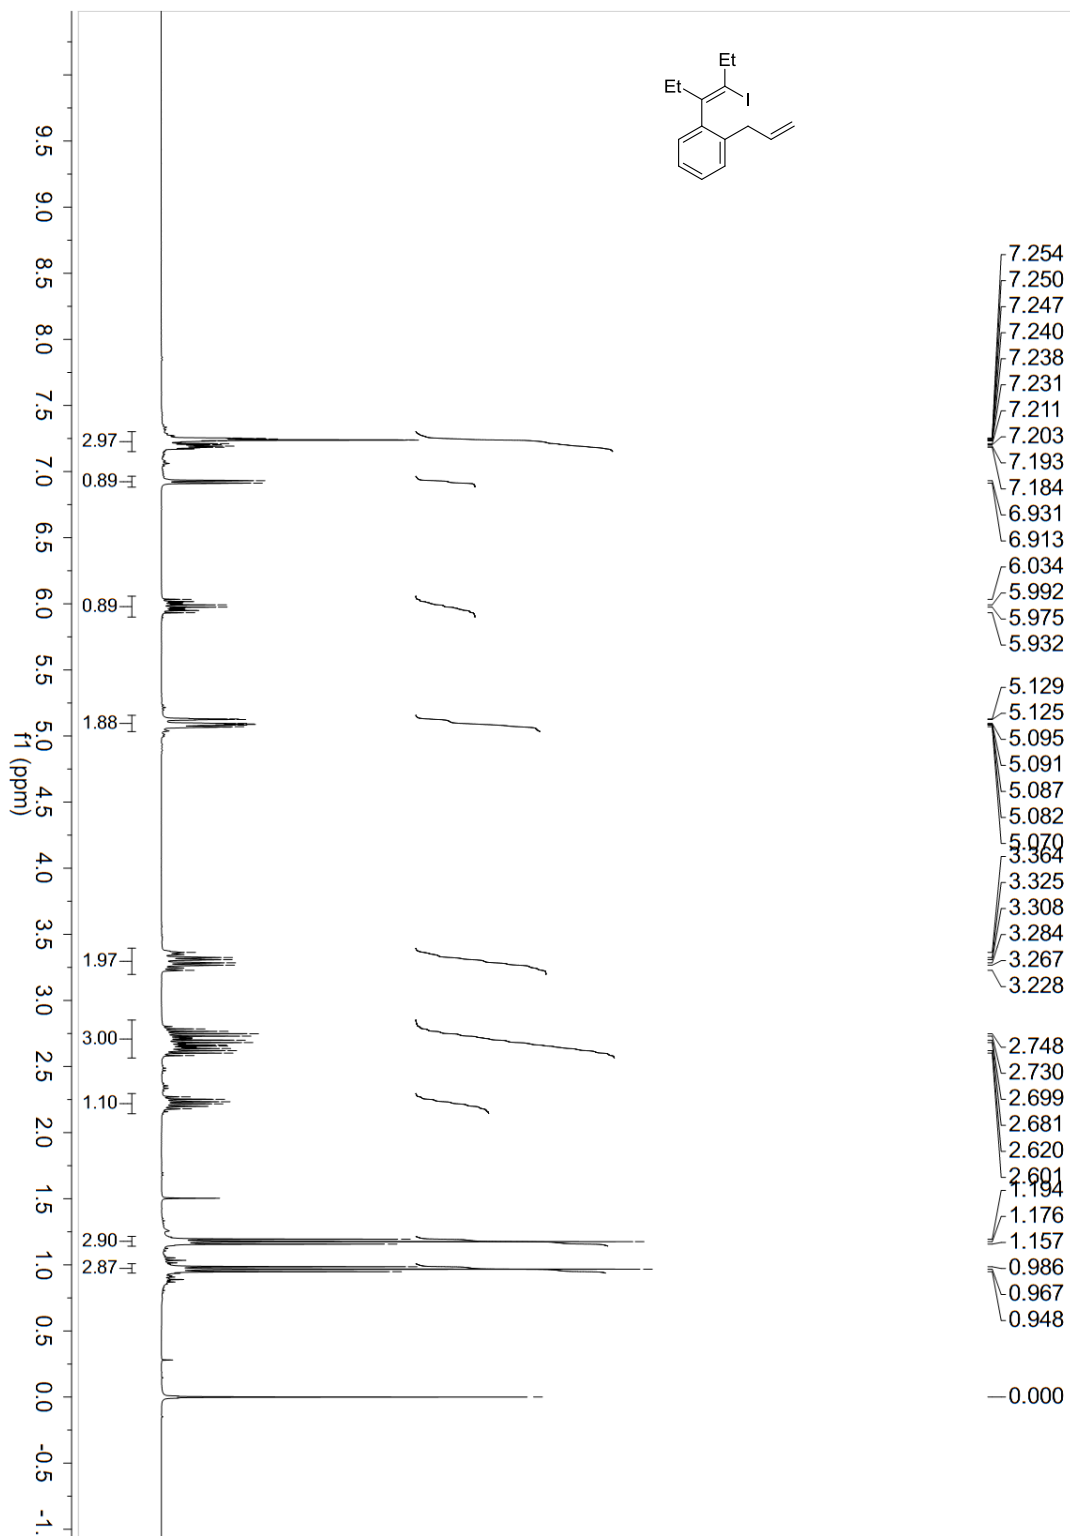

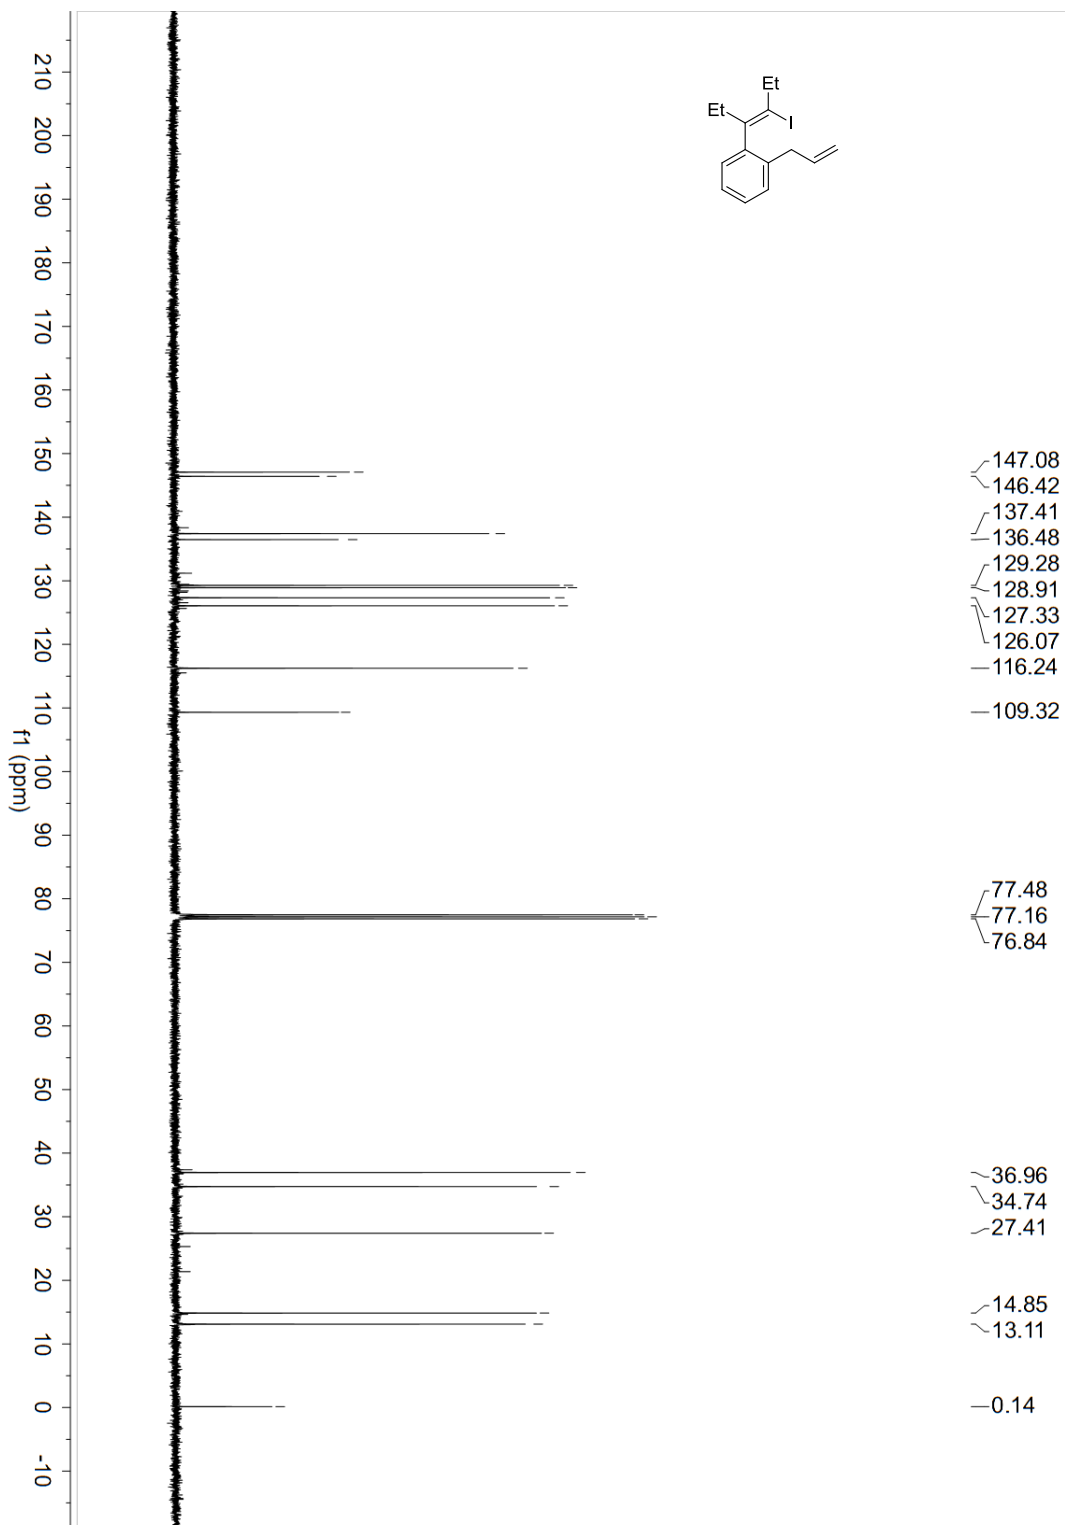

5a1

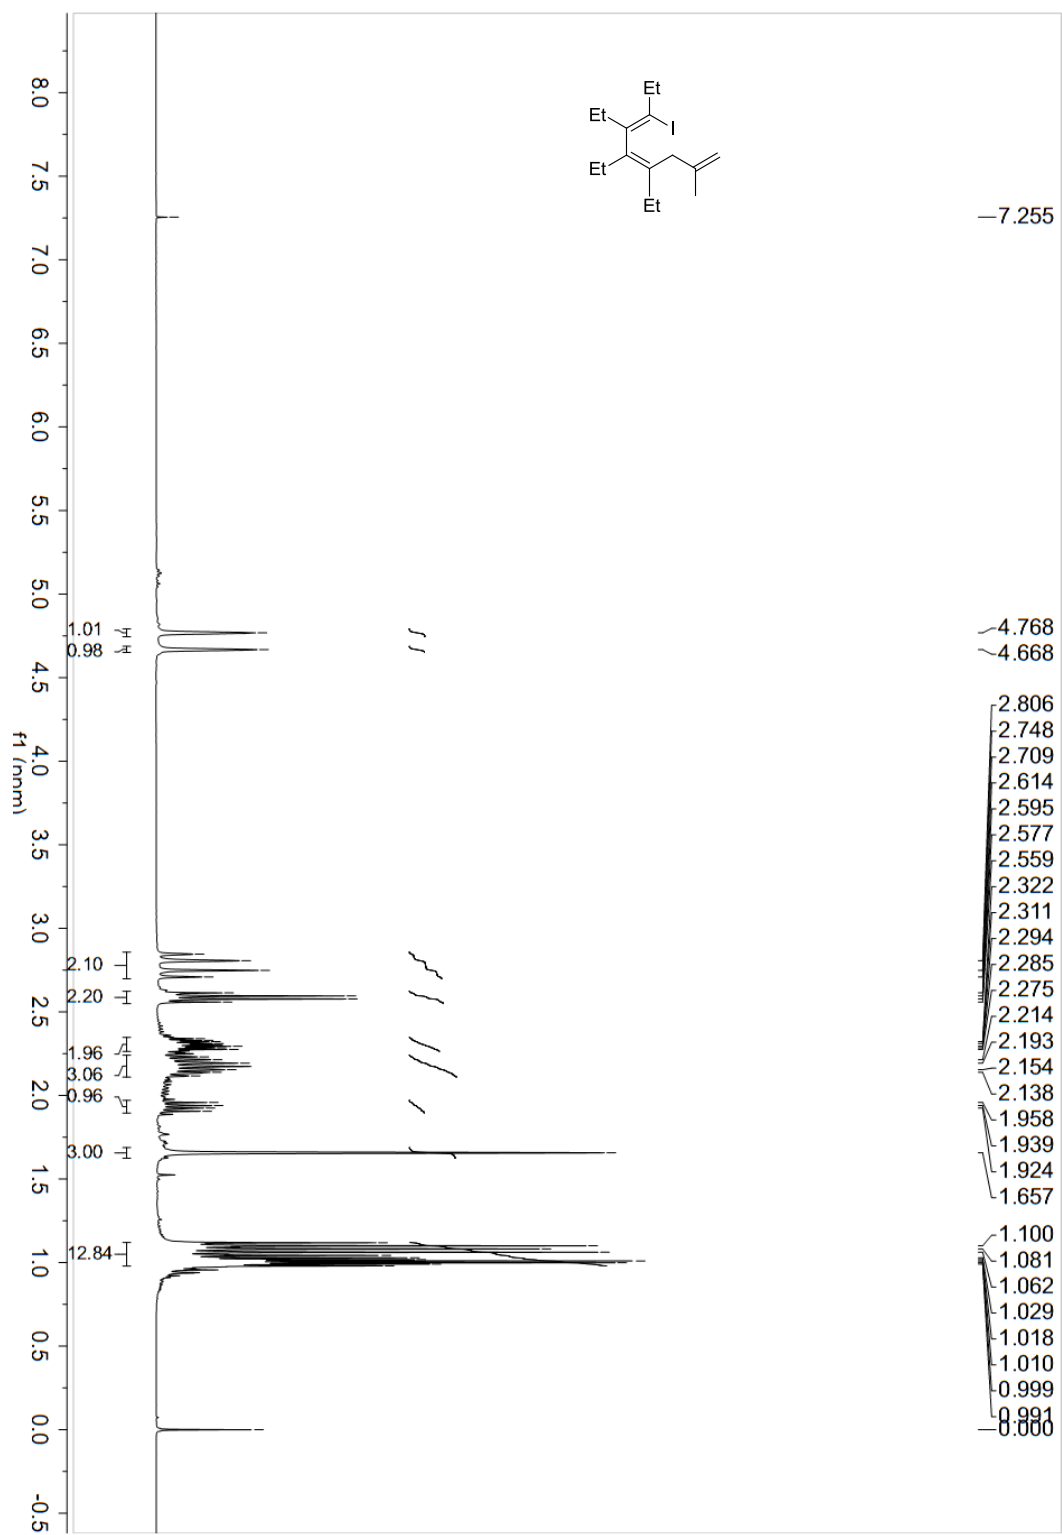

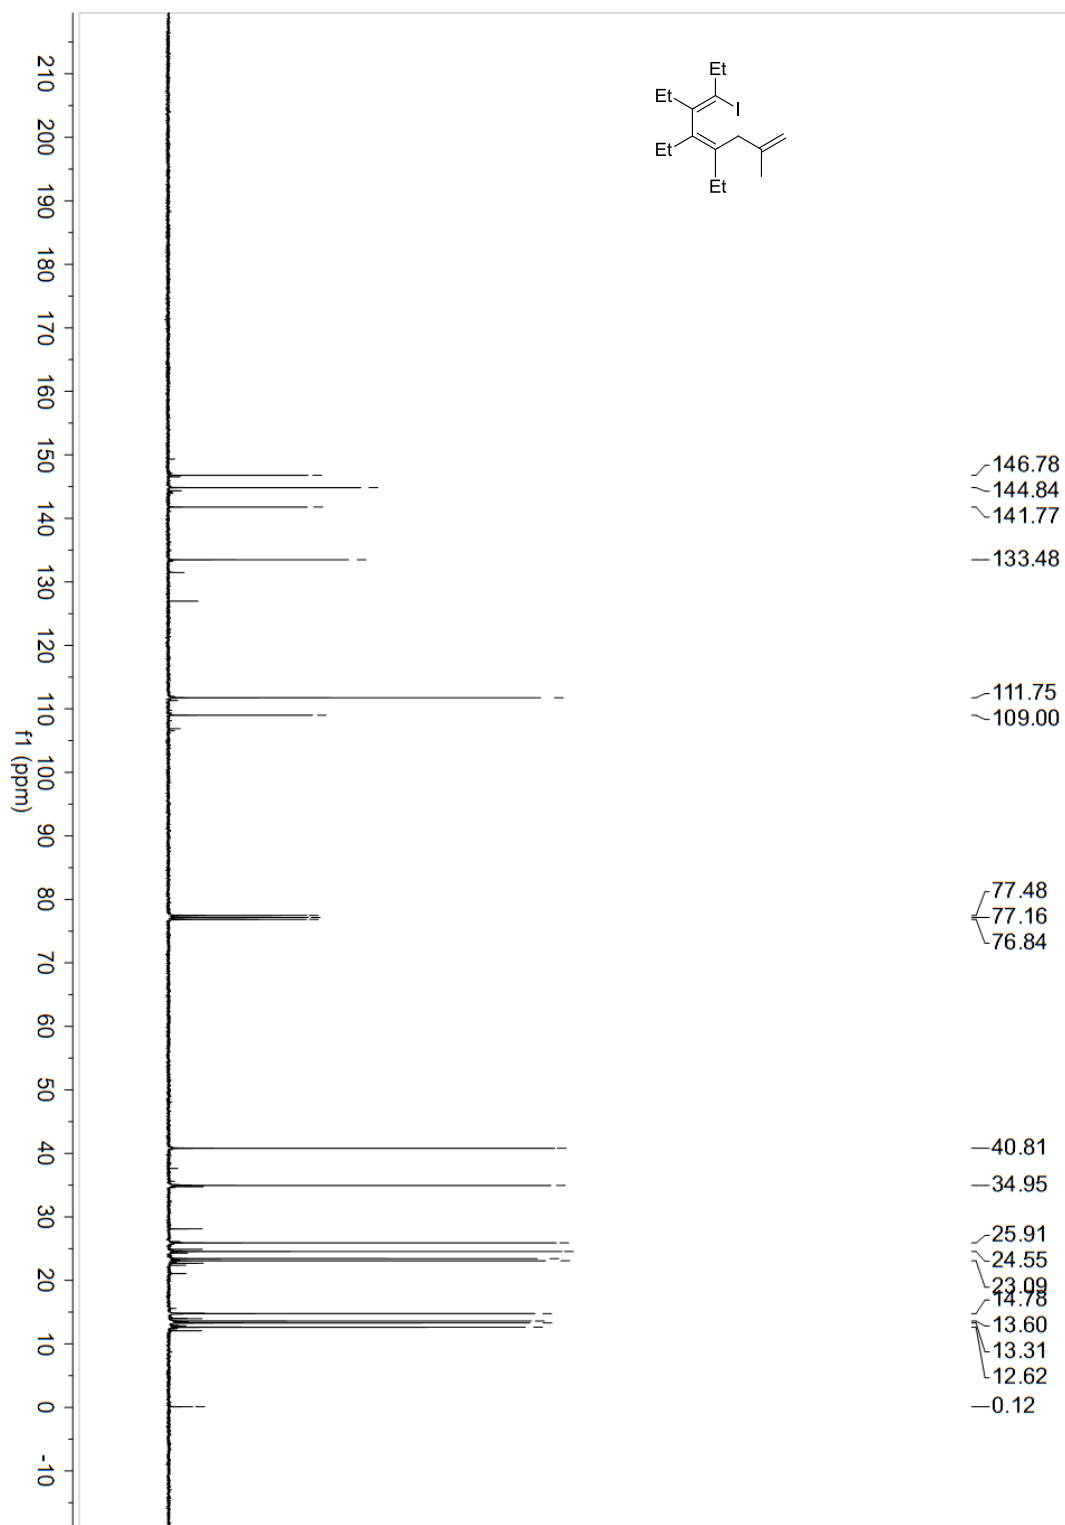



5a2

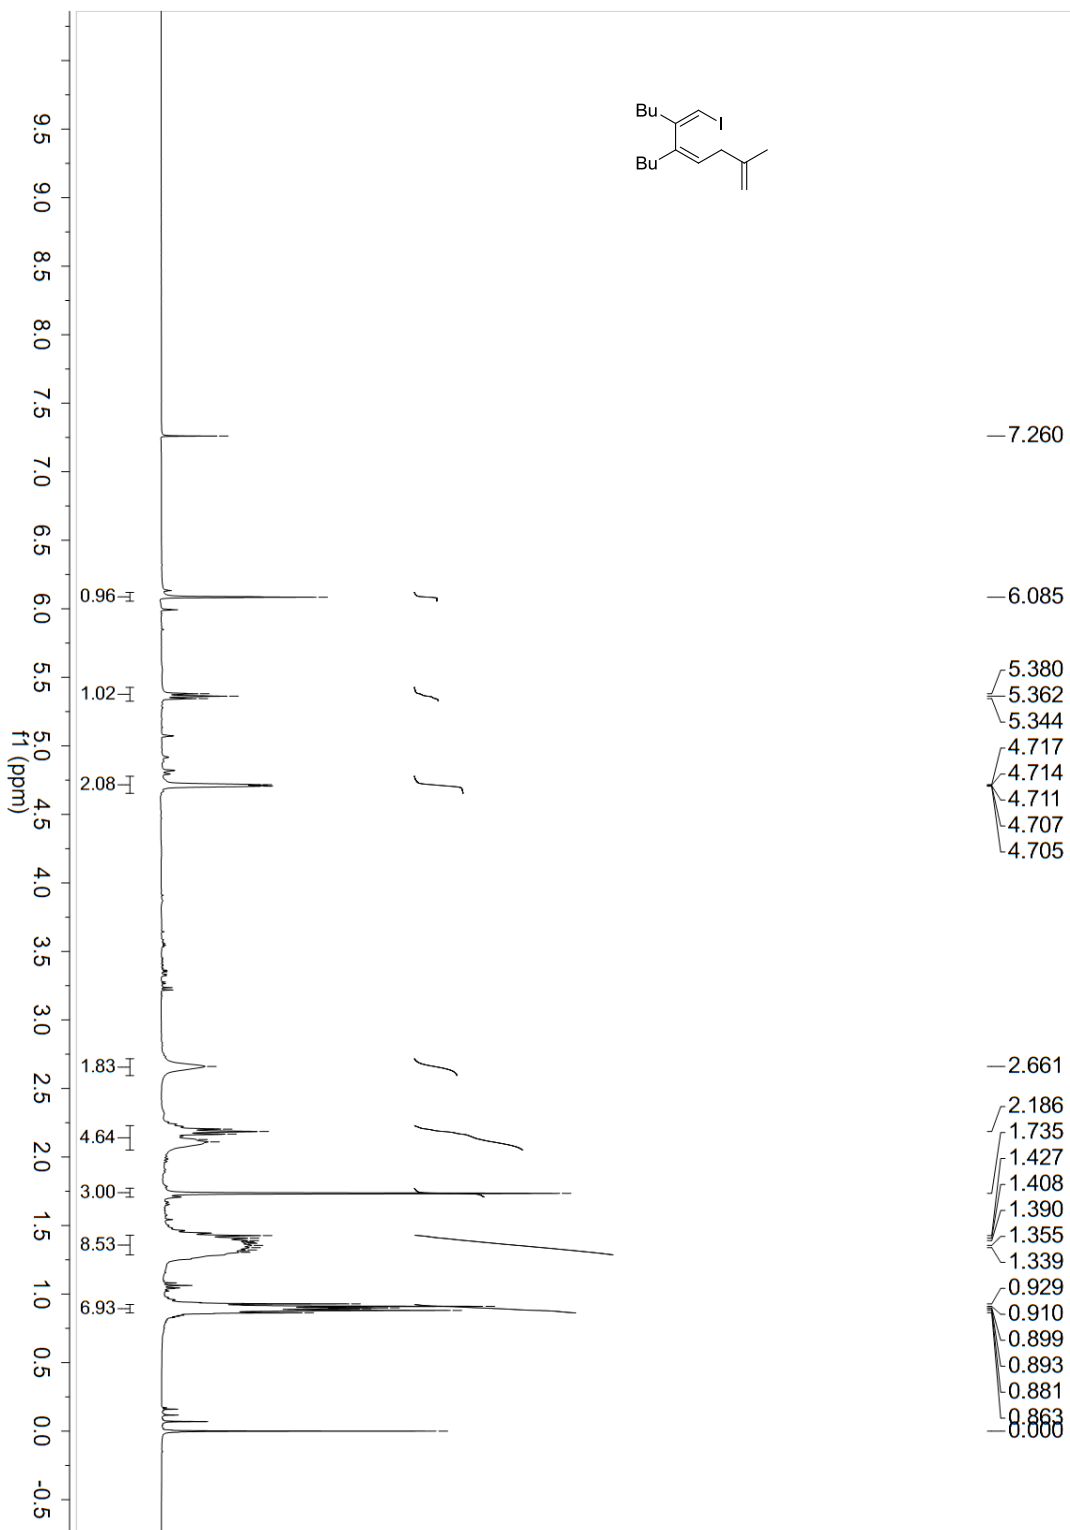

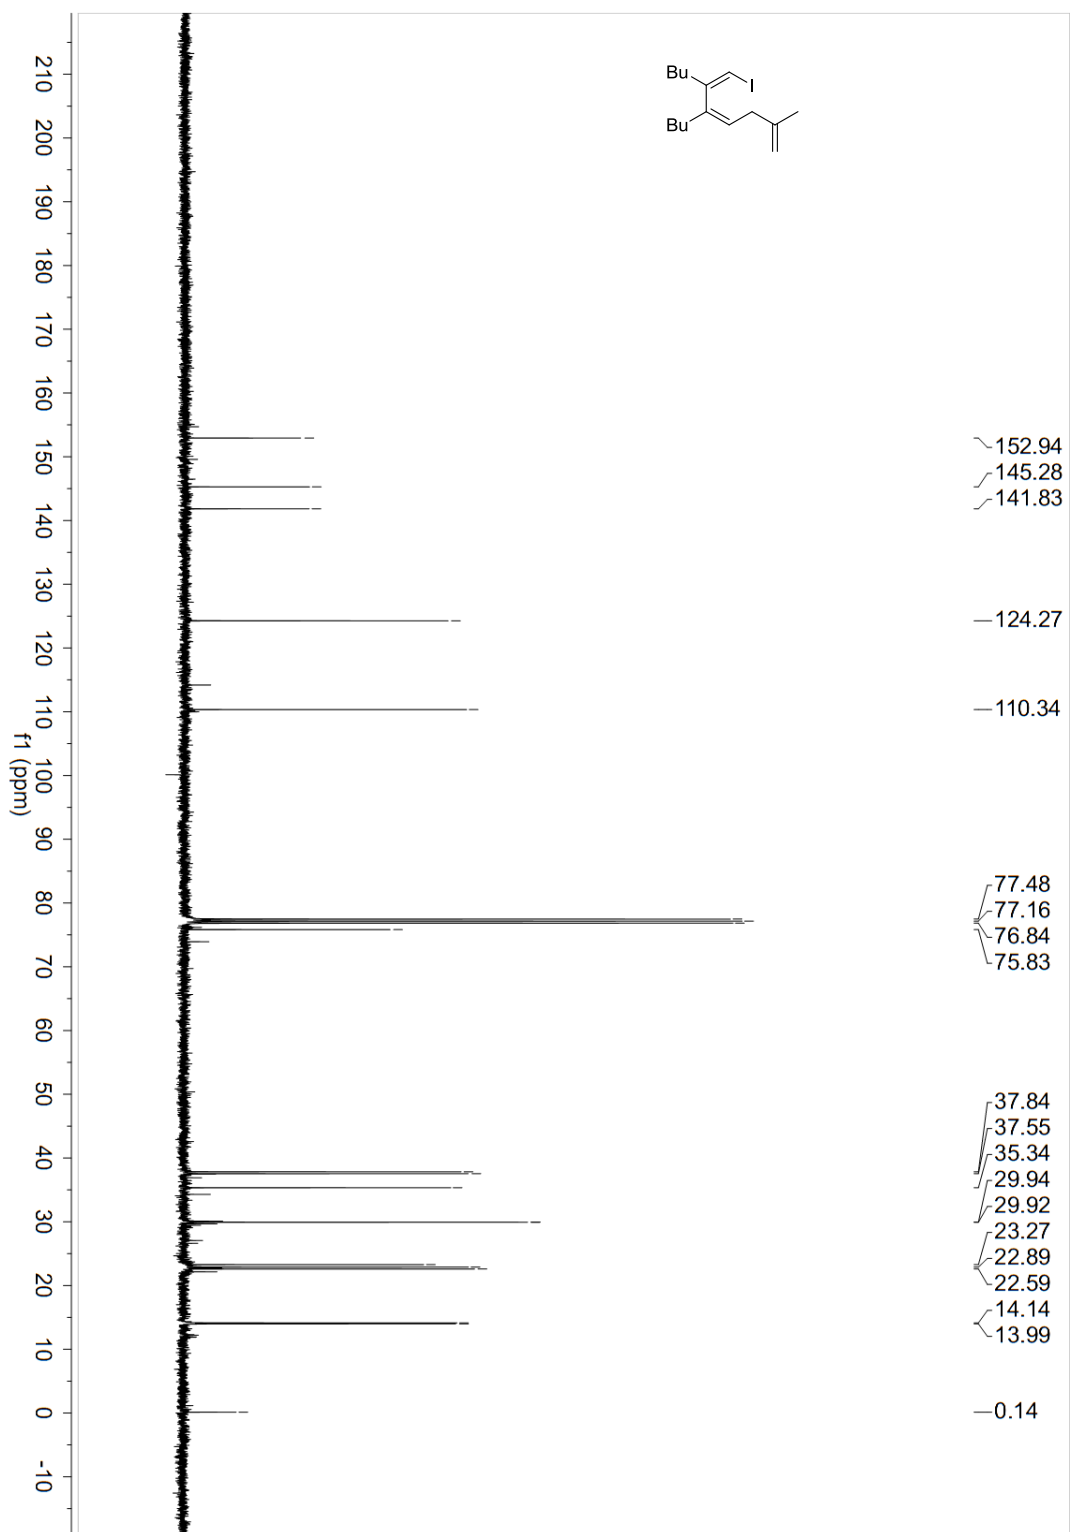

5b1

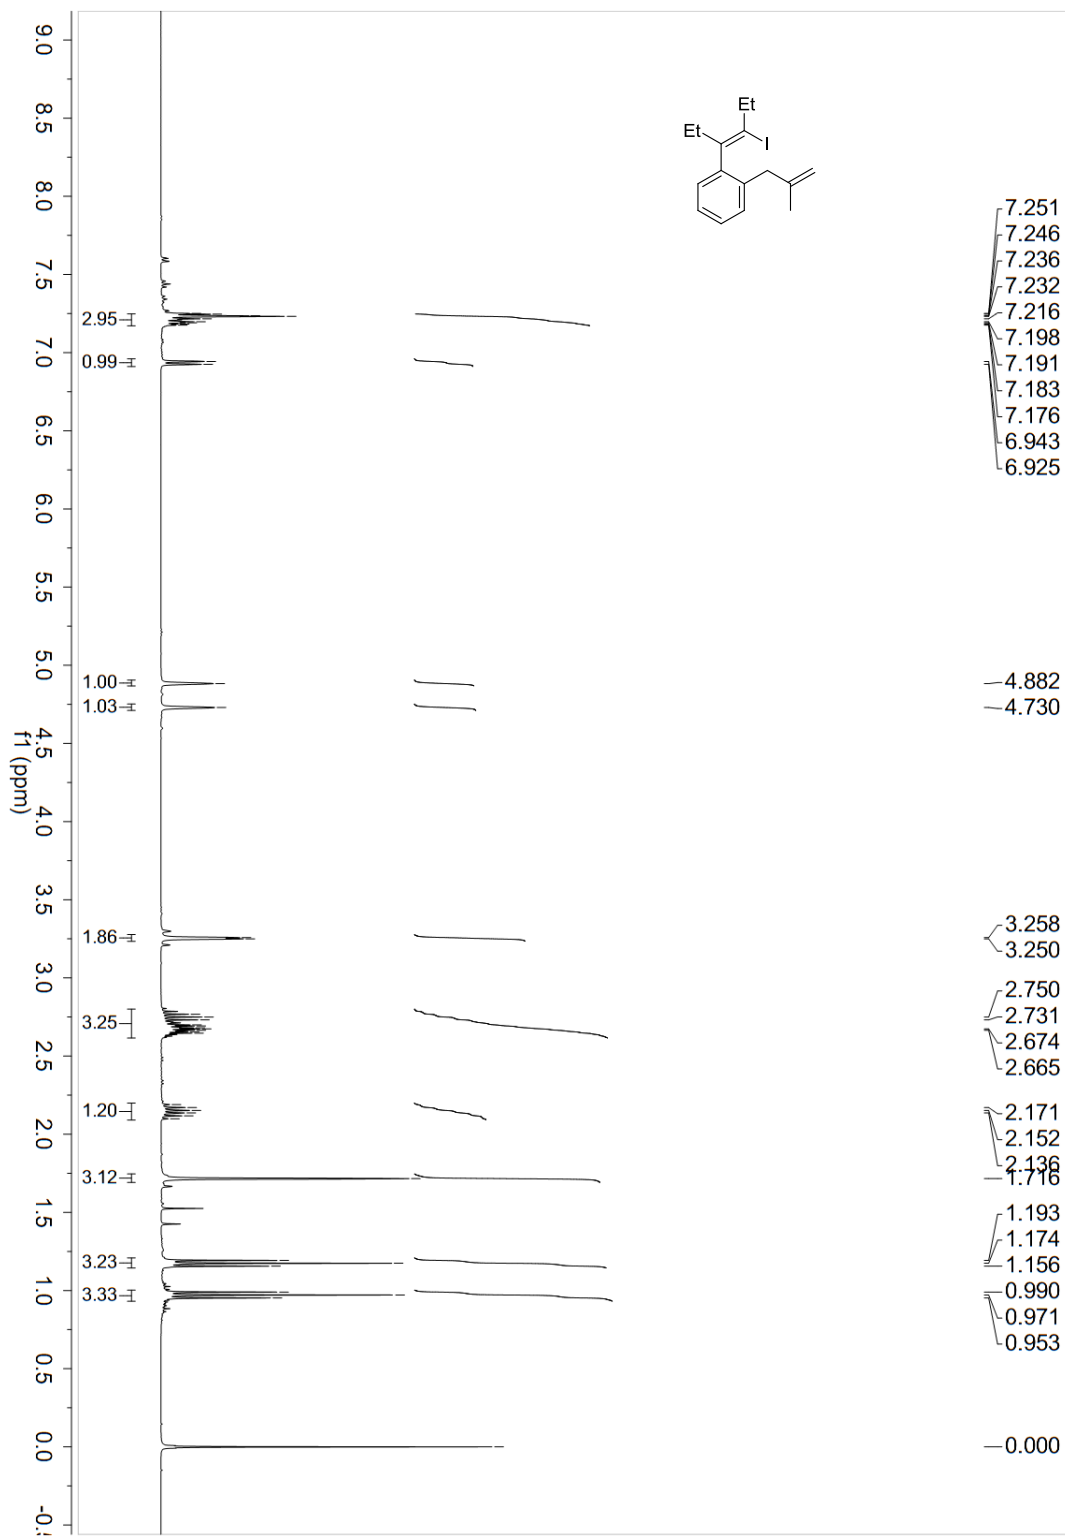

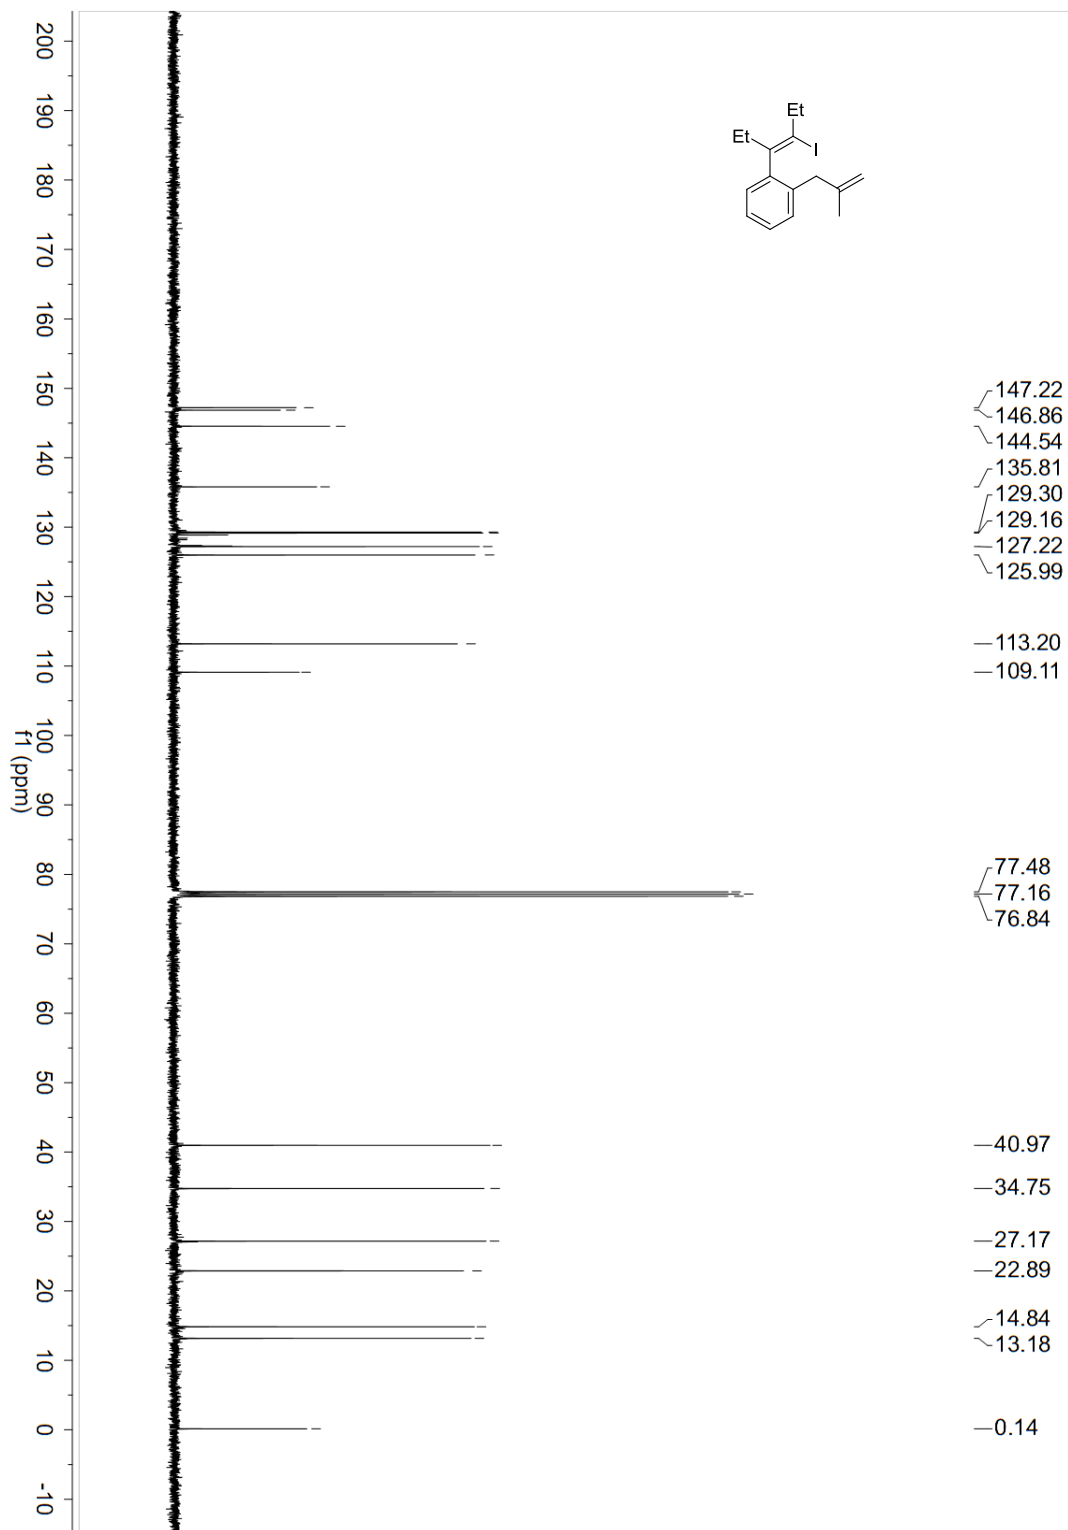

5b2

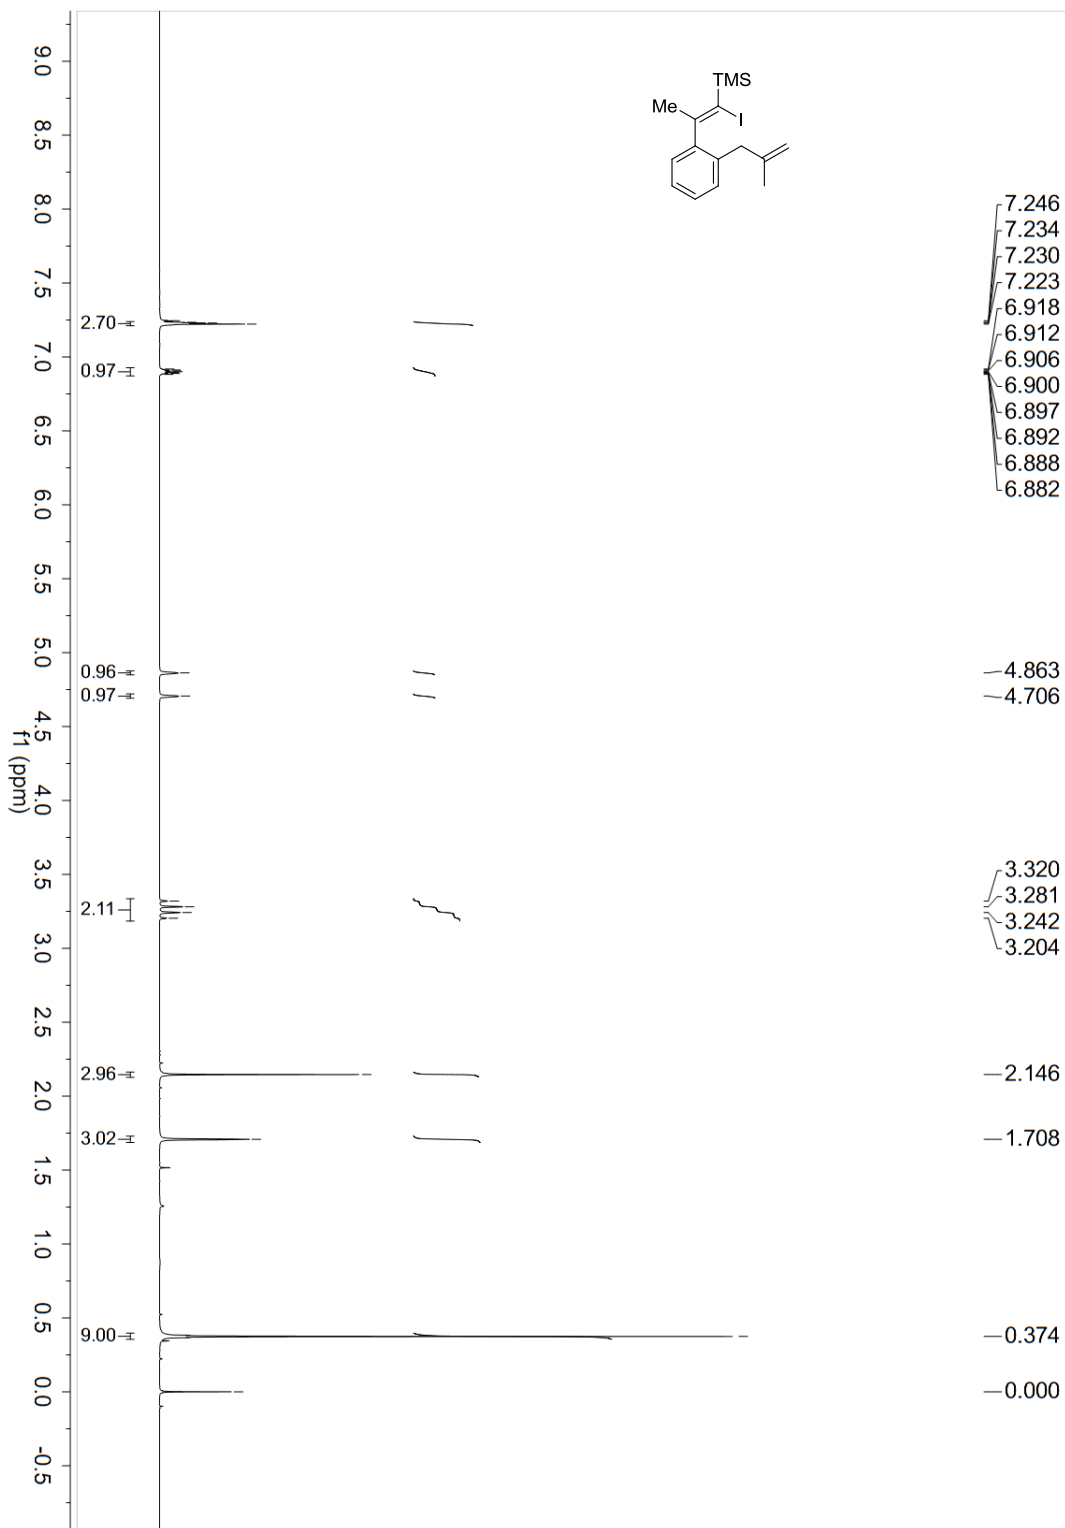

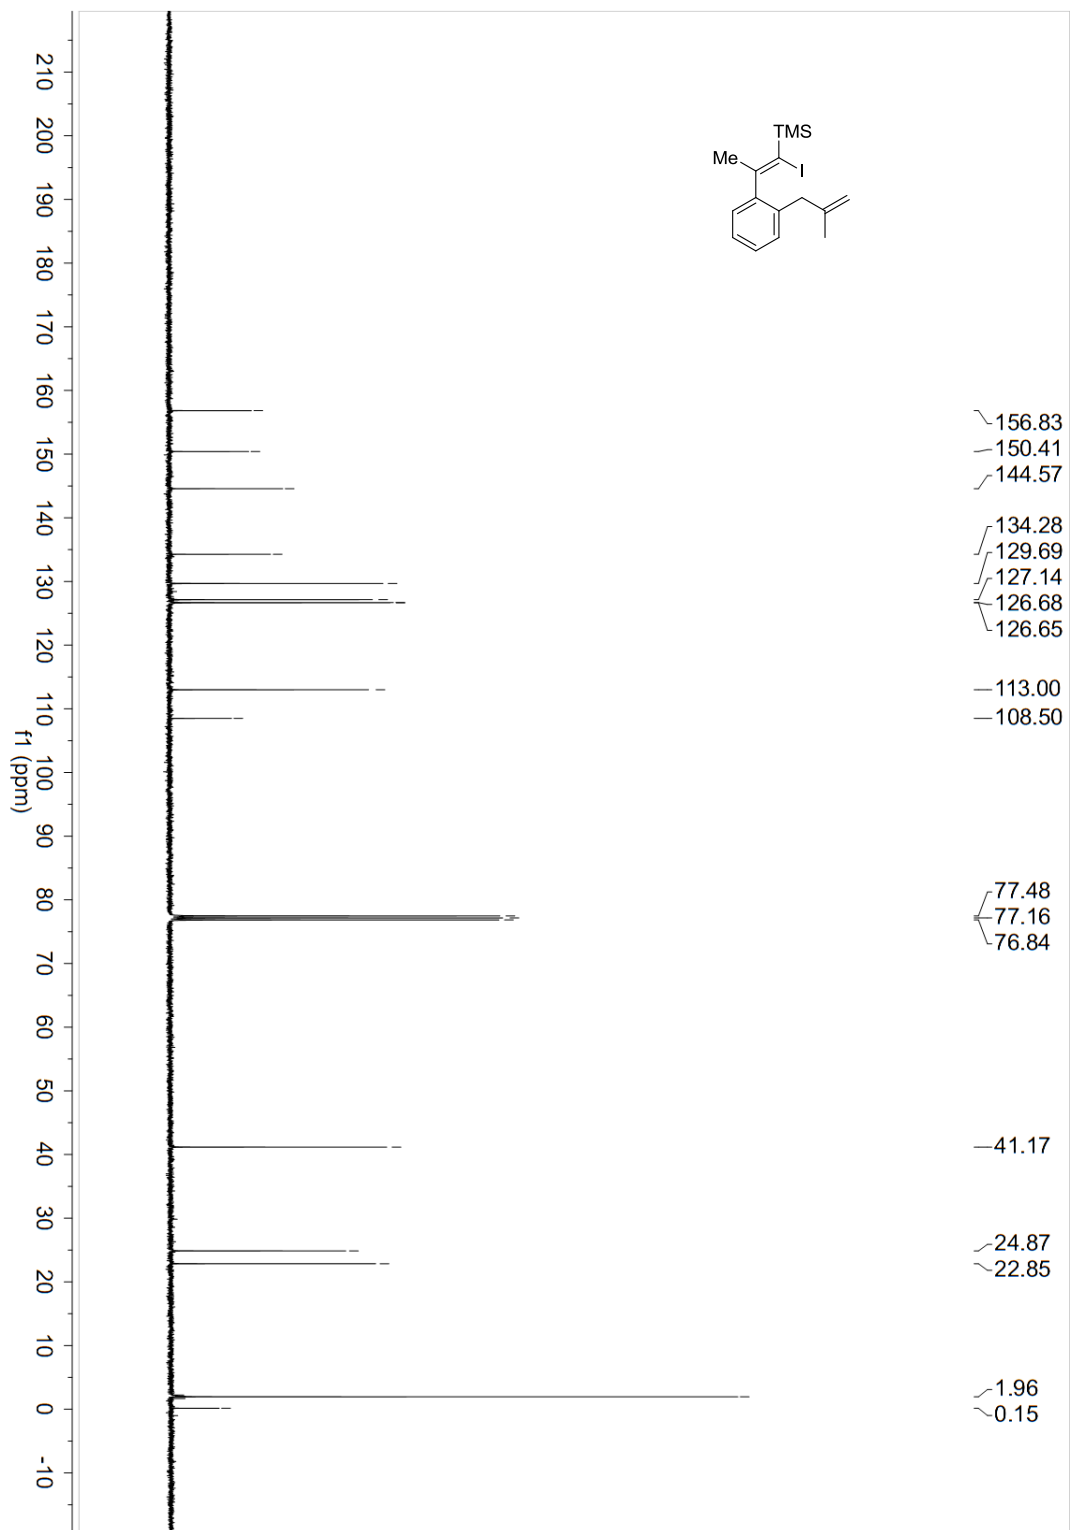

6a

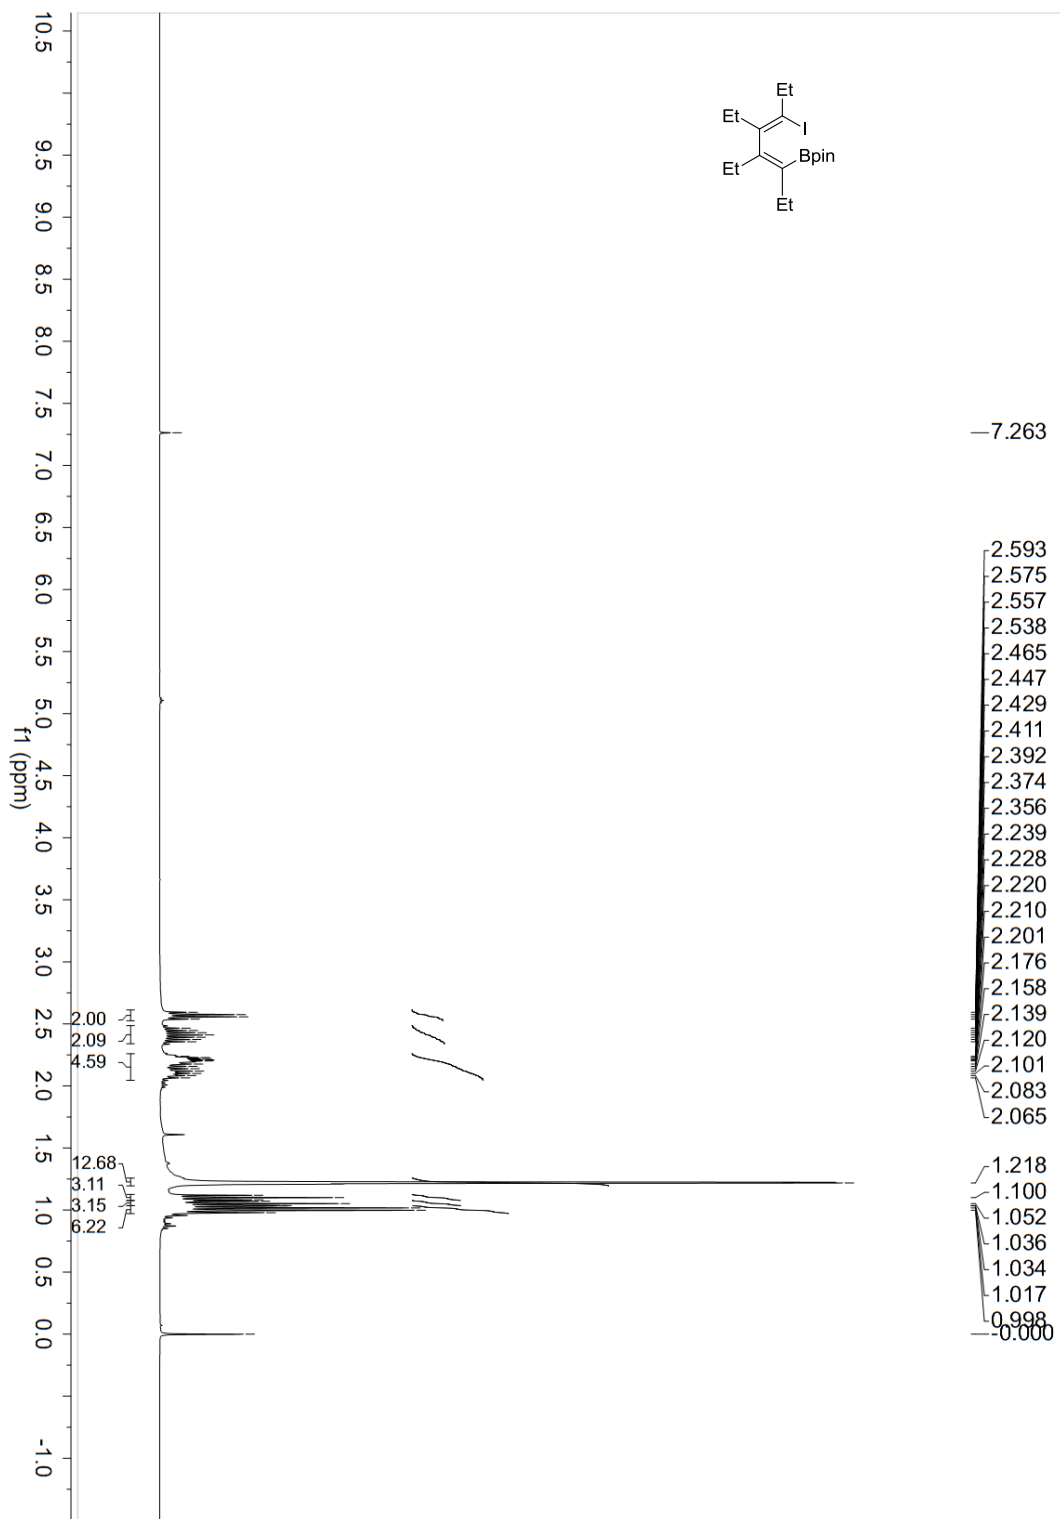

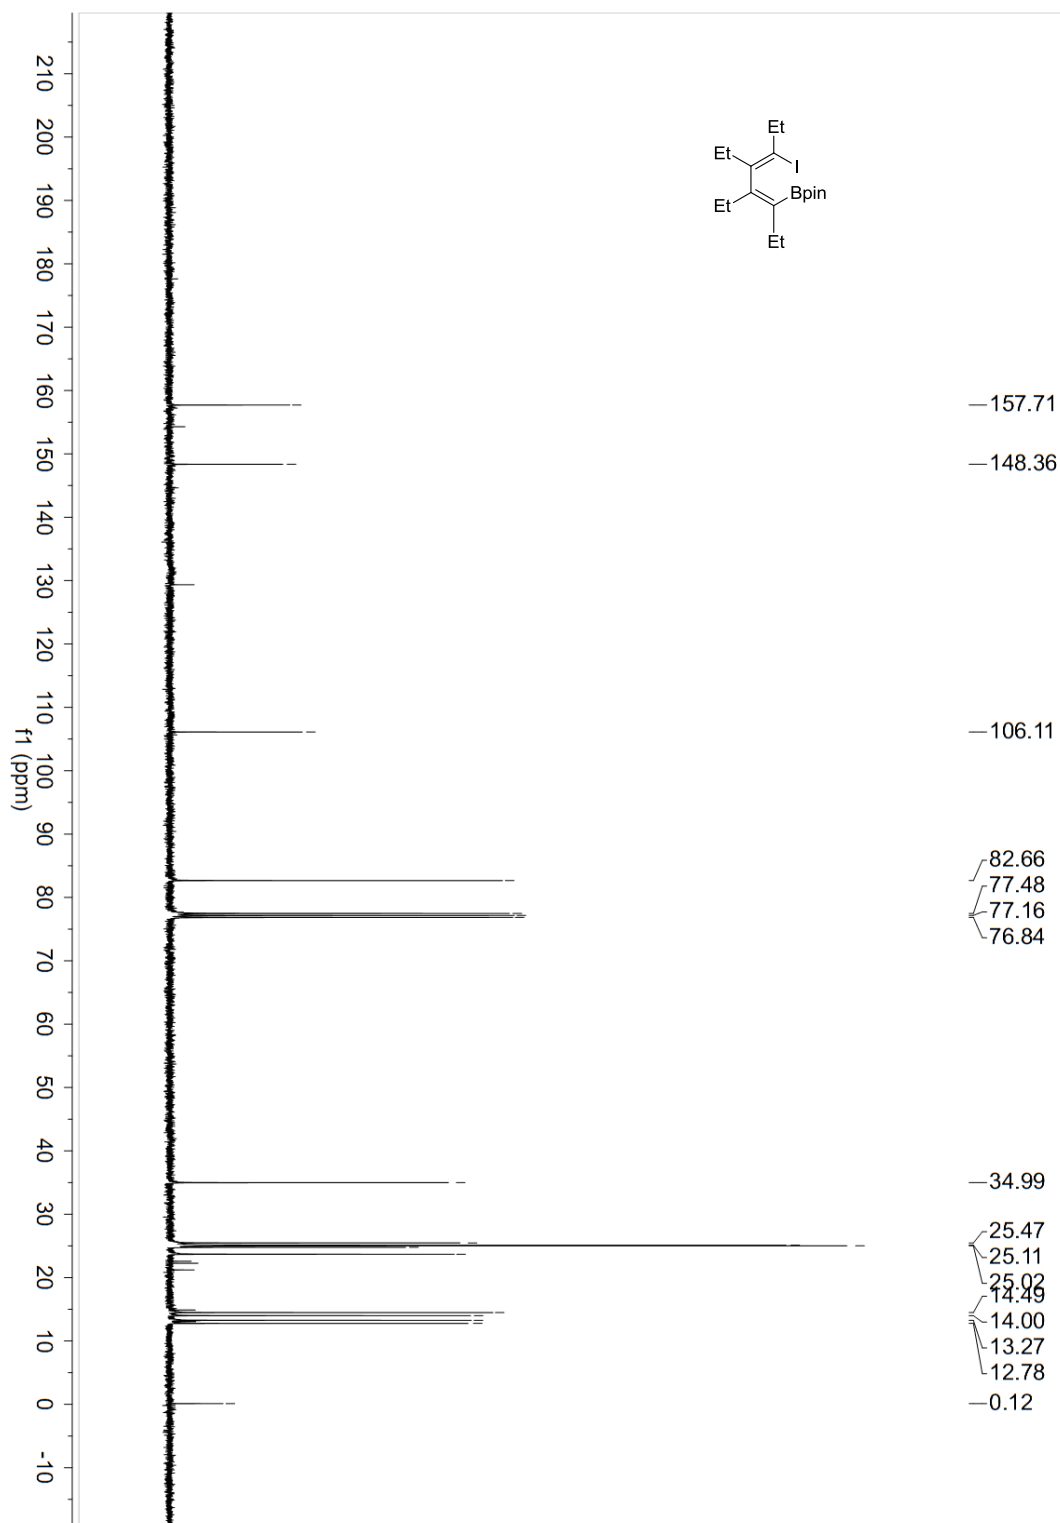



6b1

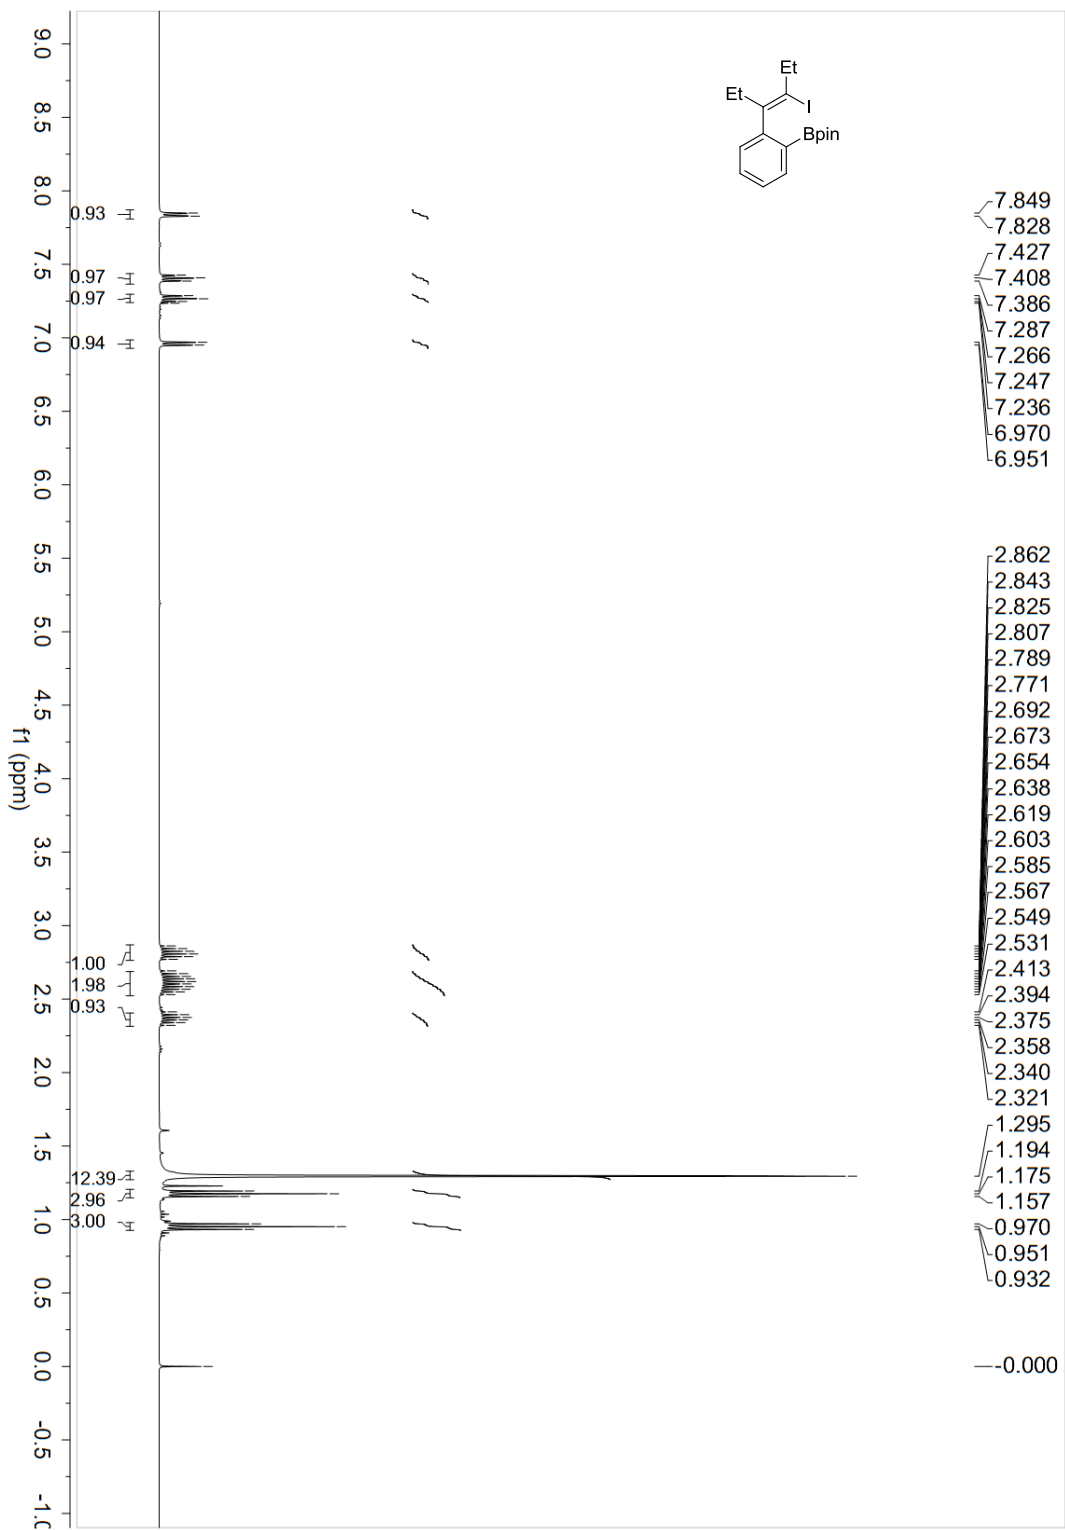

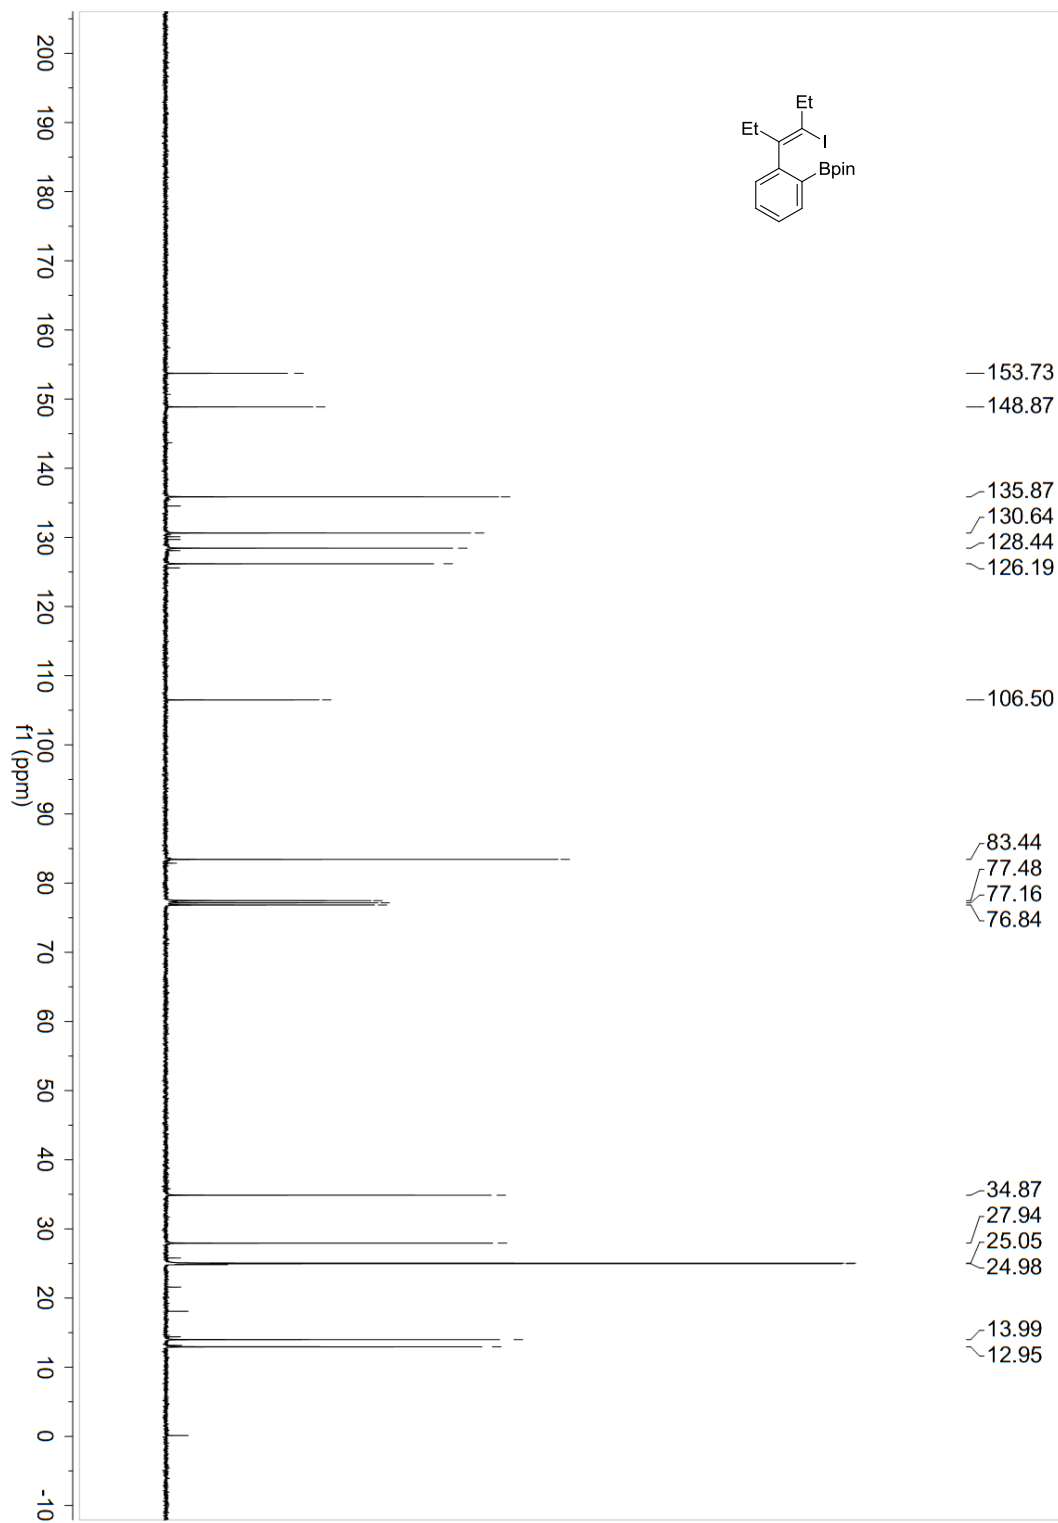

6b2

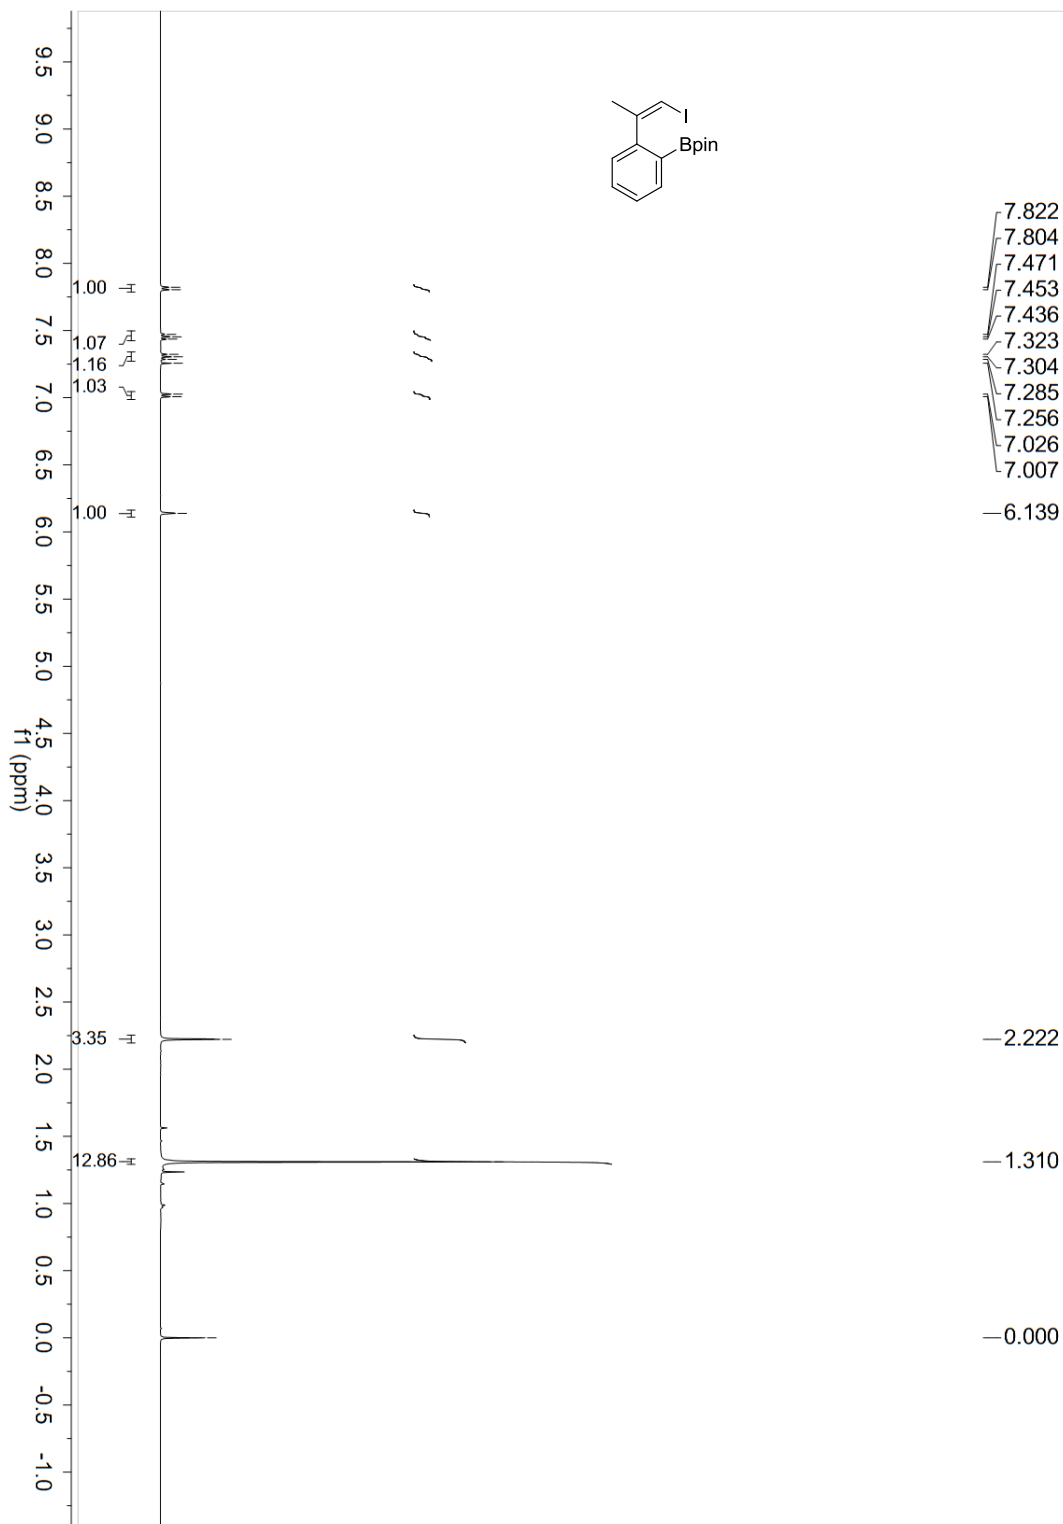

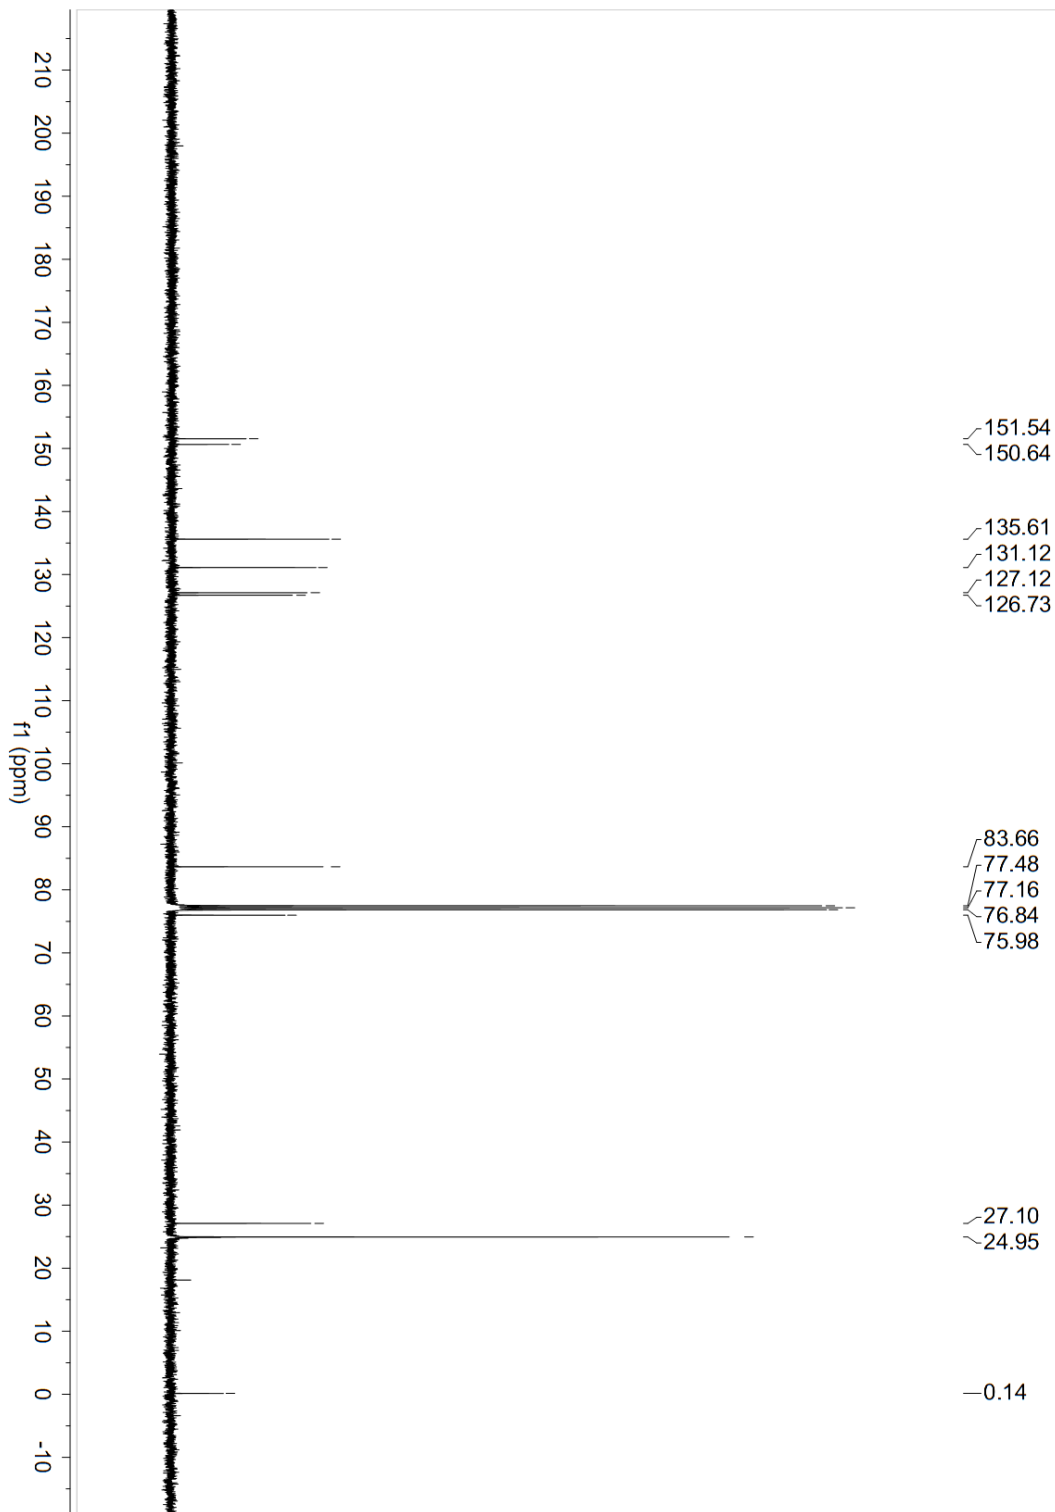

7a

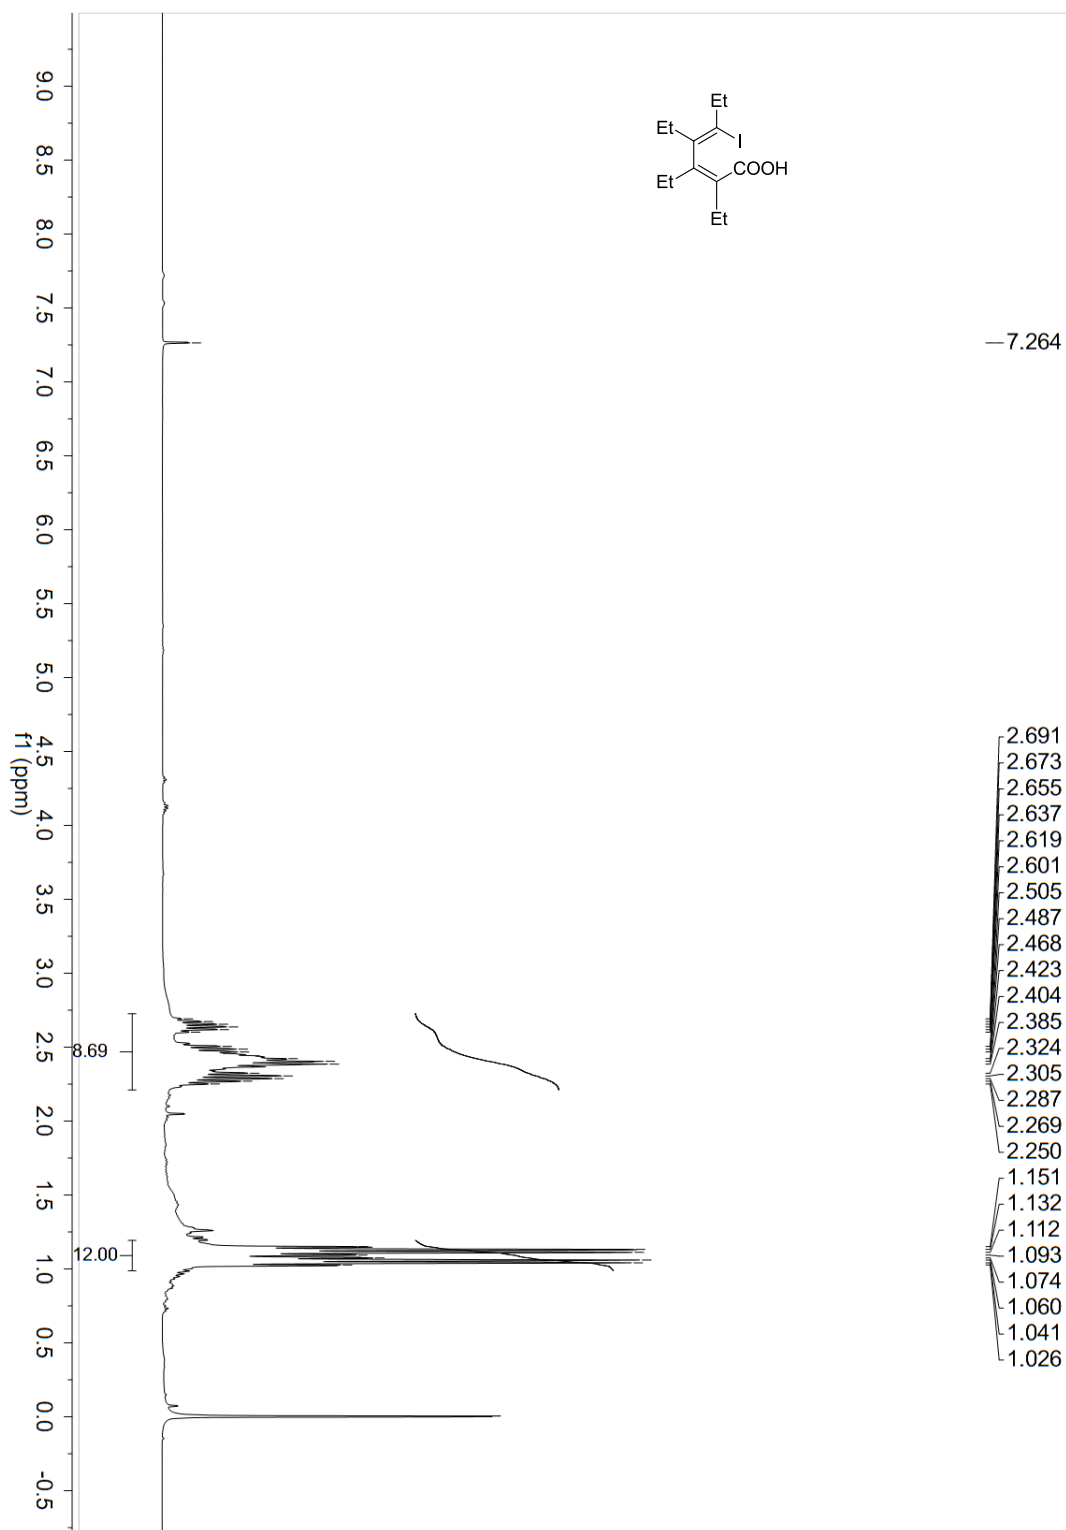

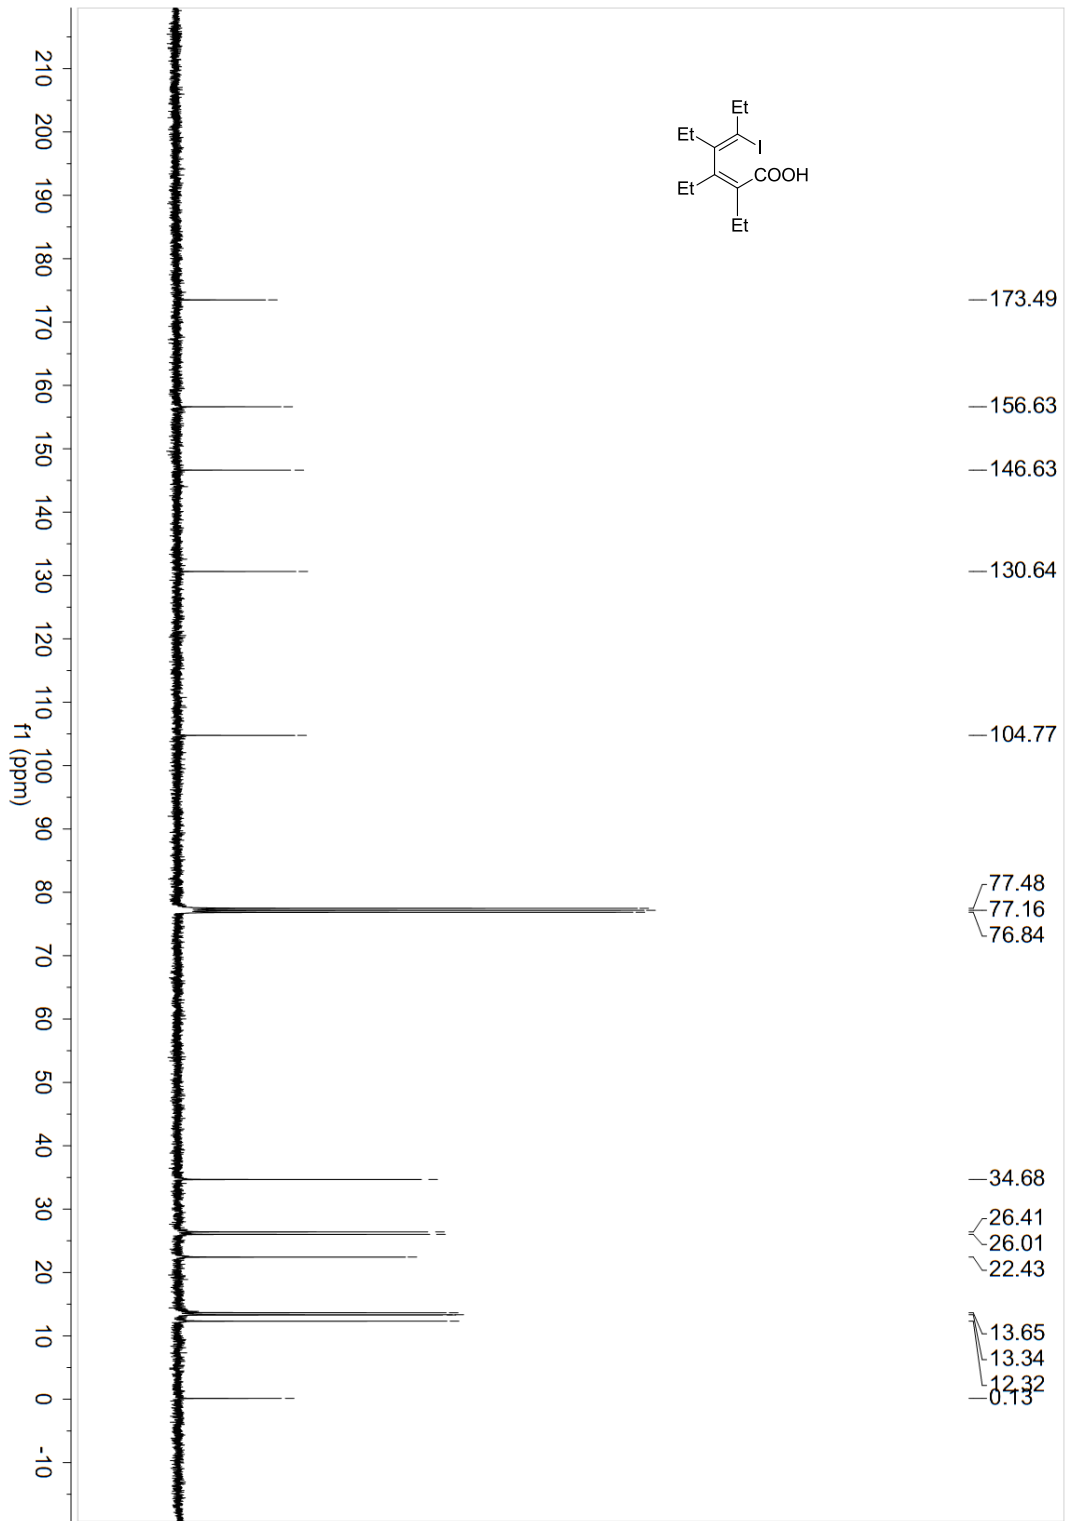

7b

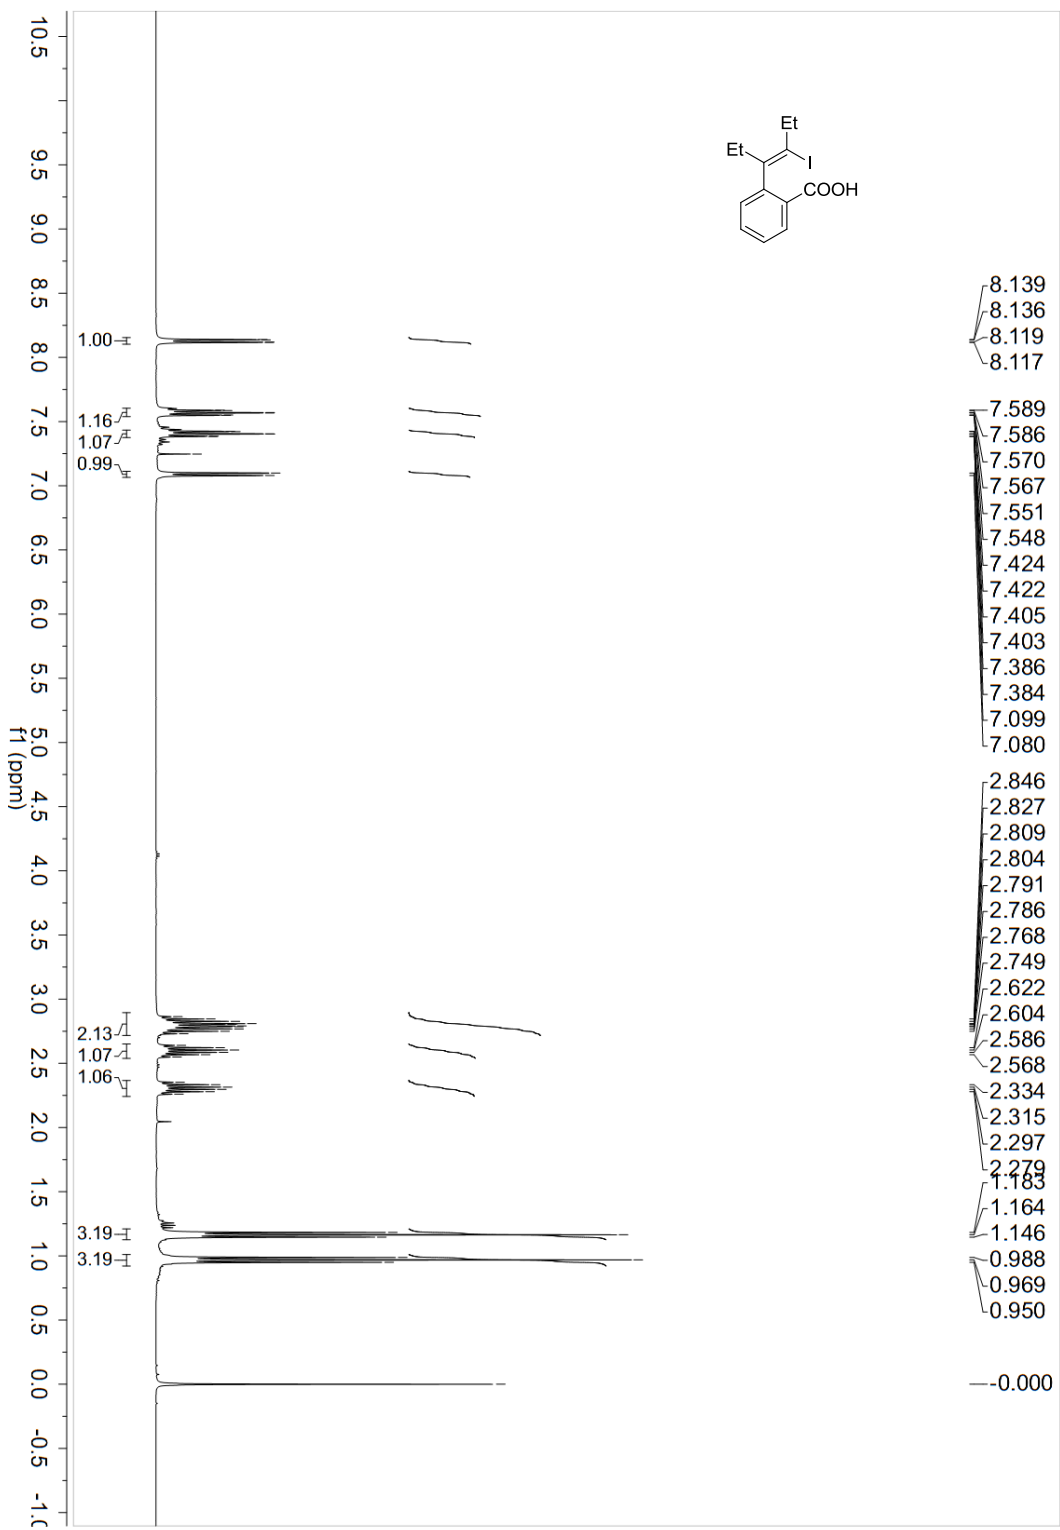

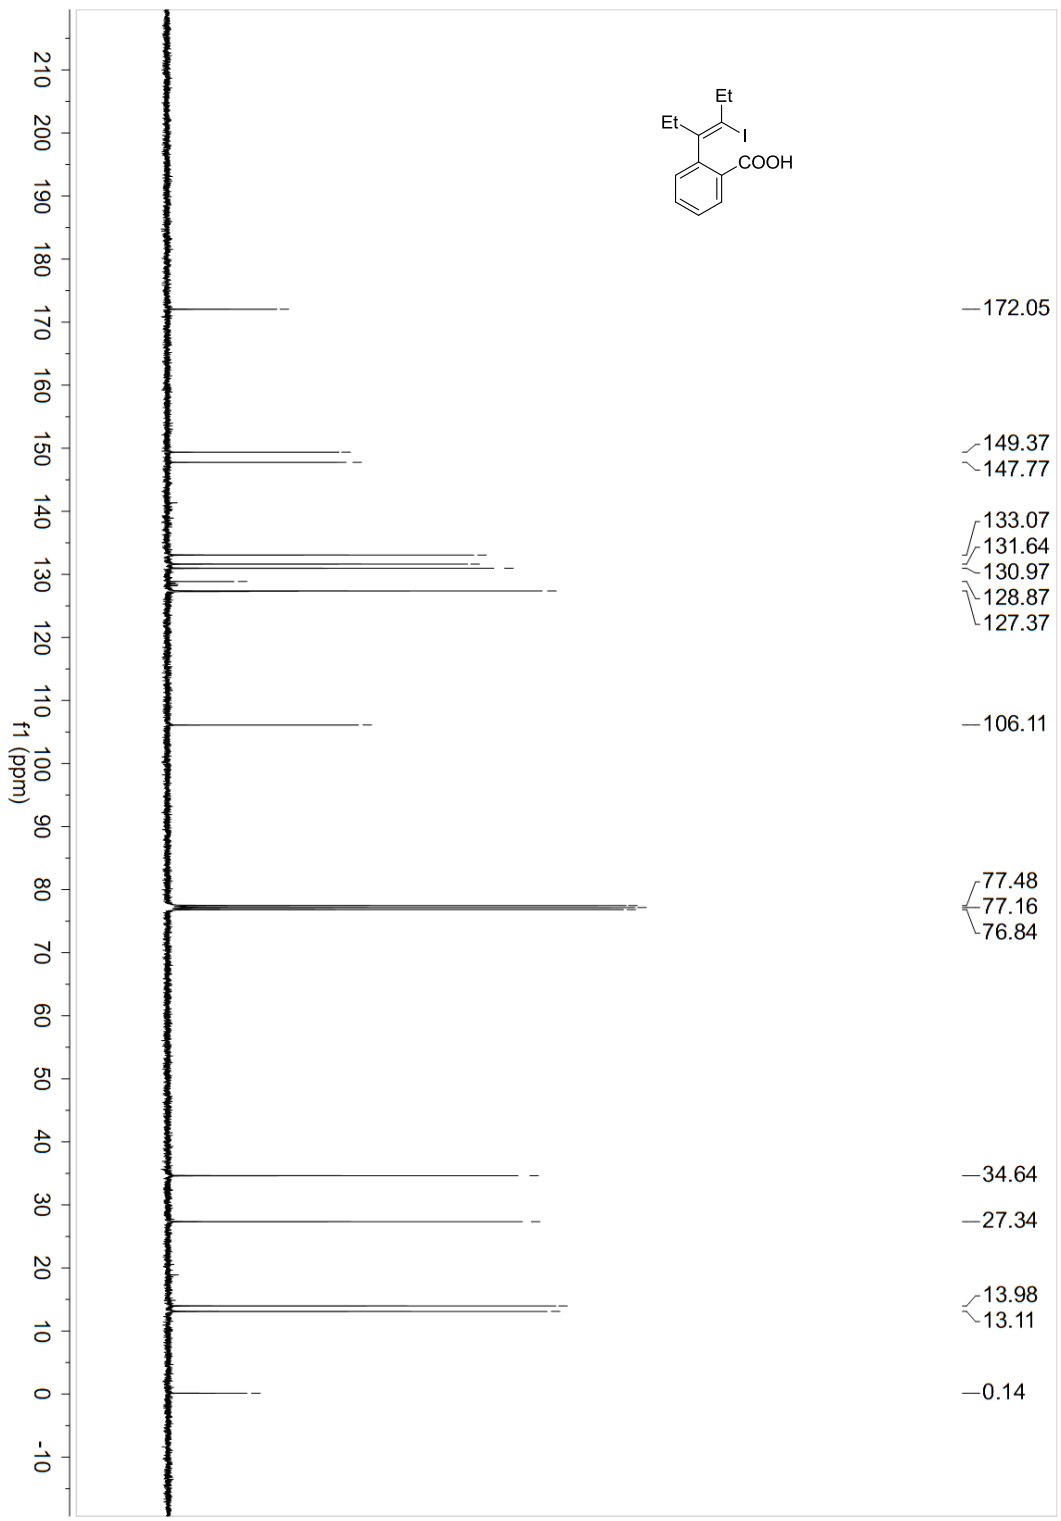



8a1

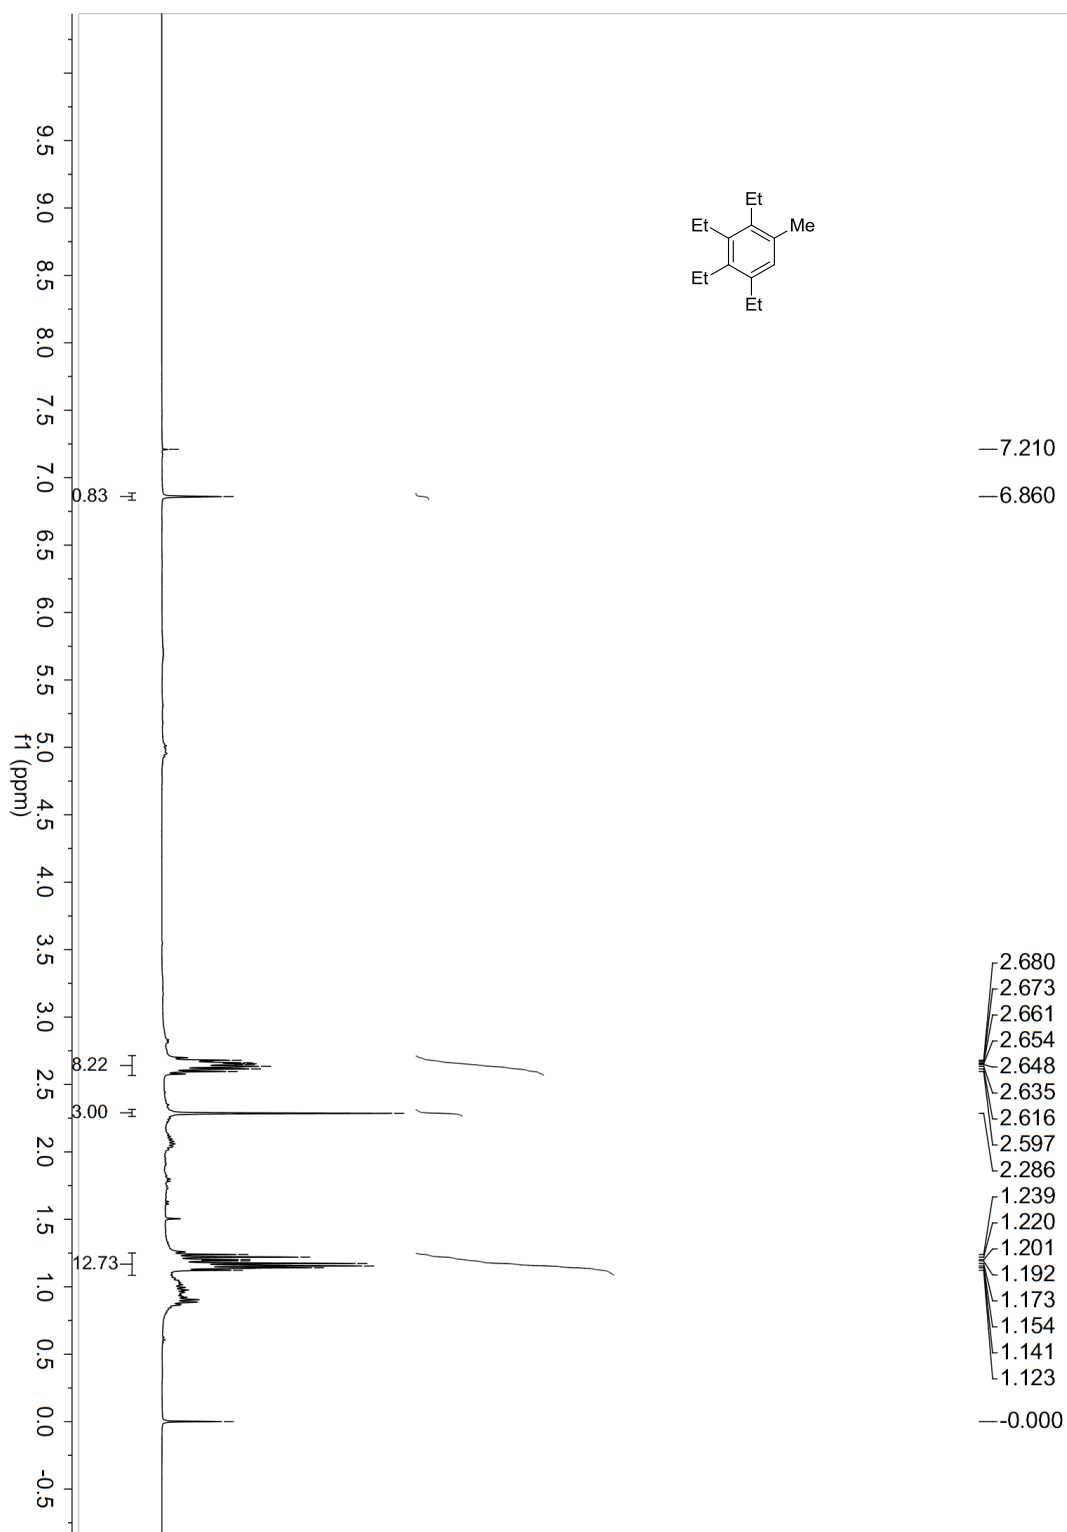

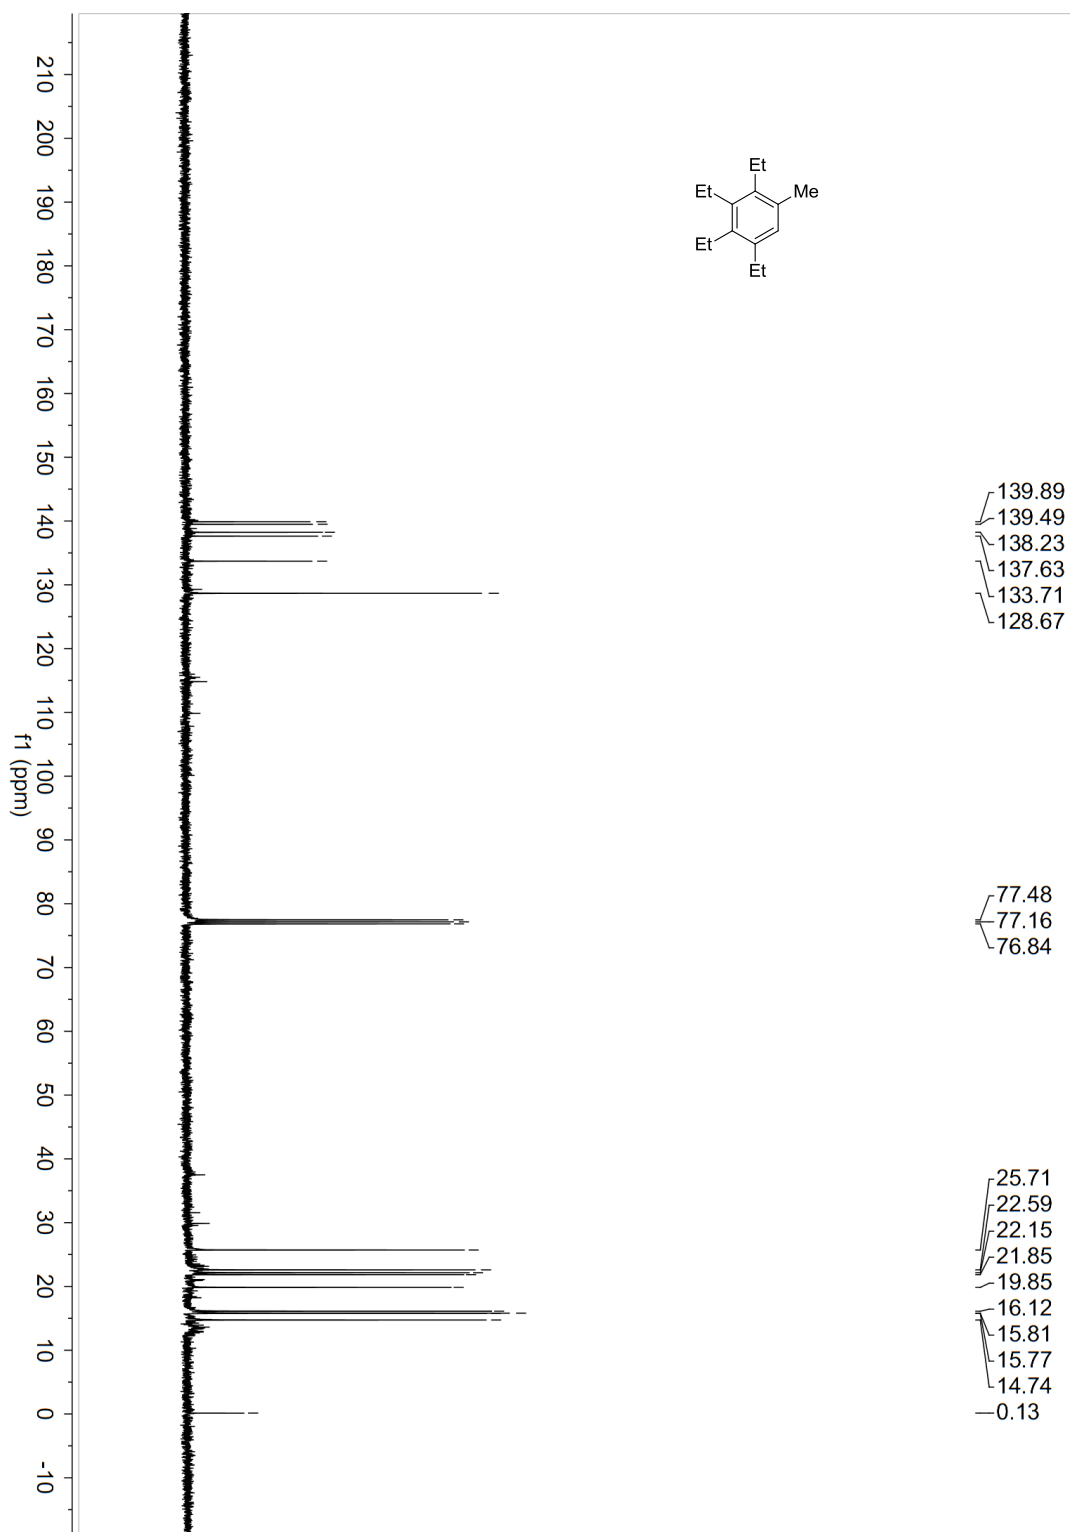

8a2

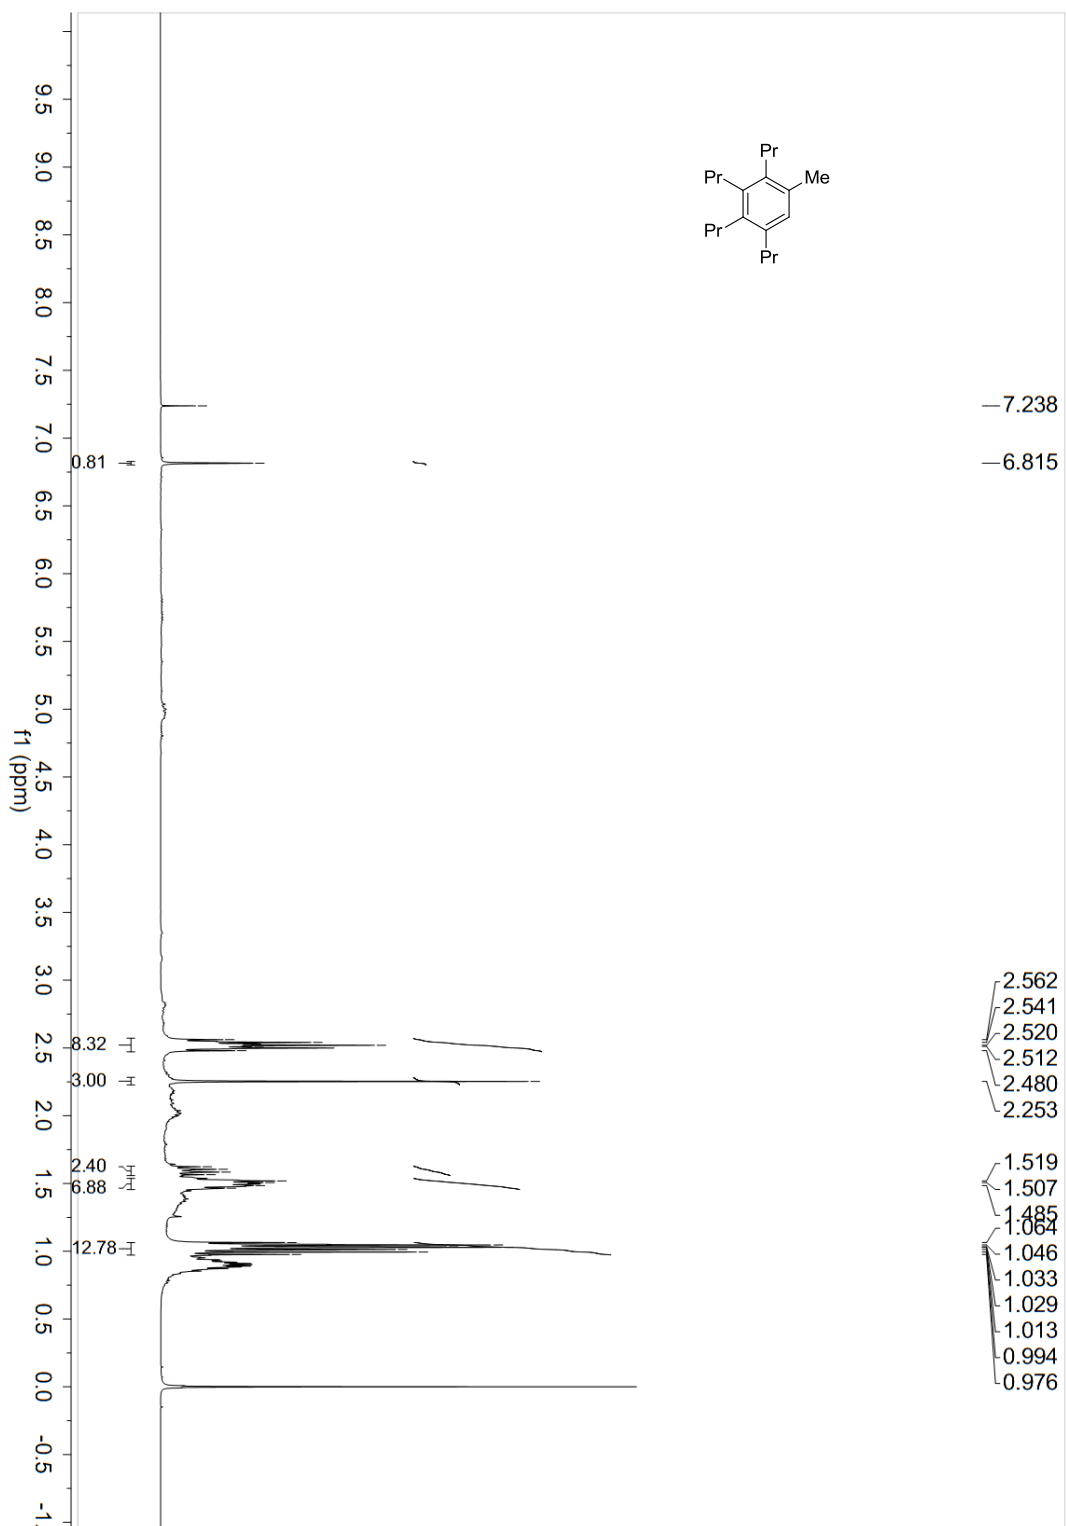

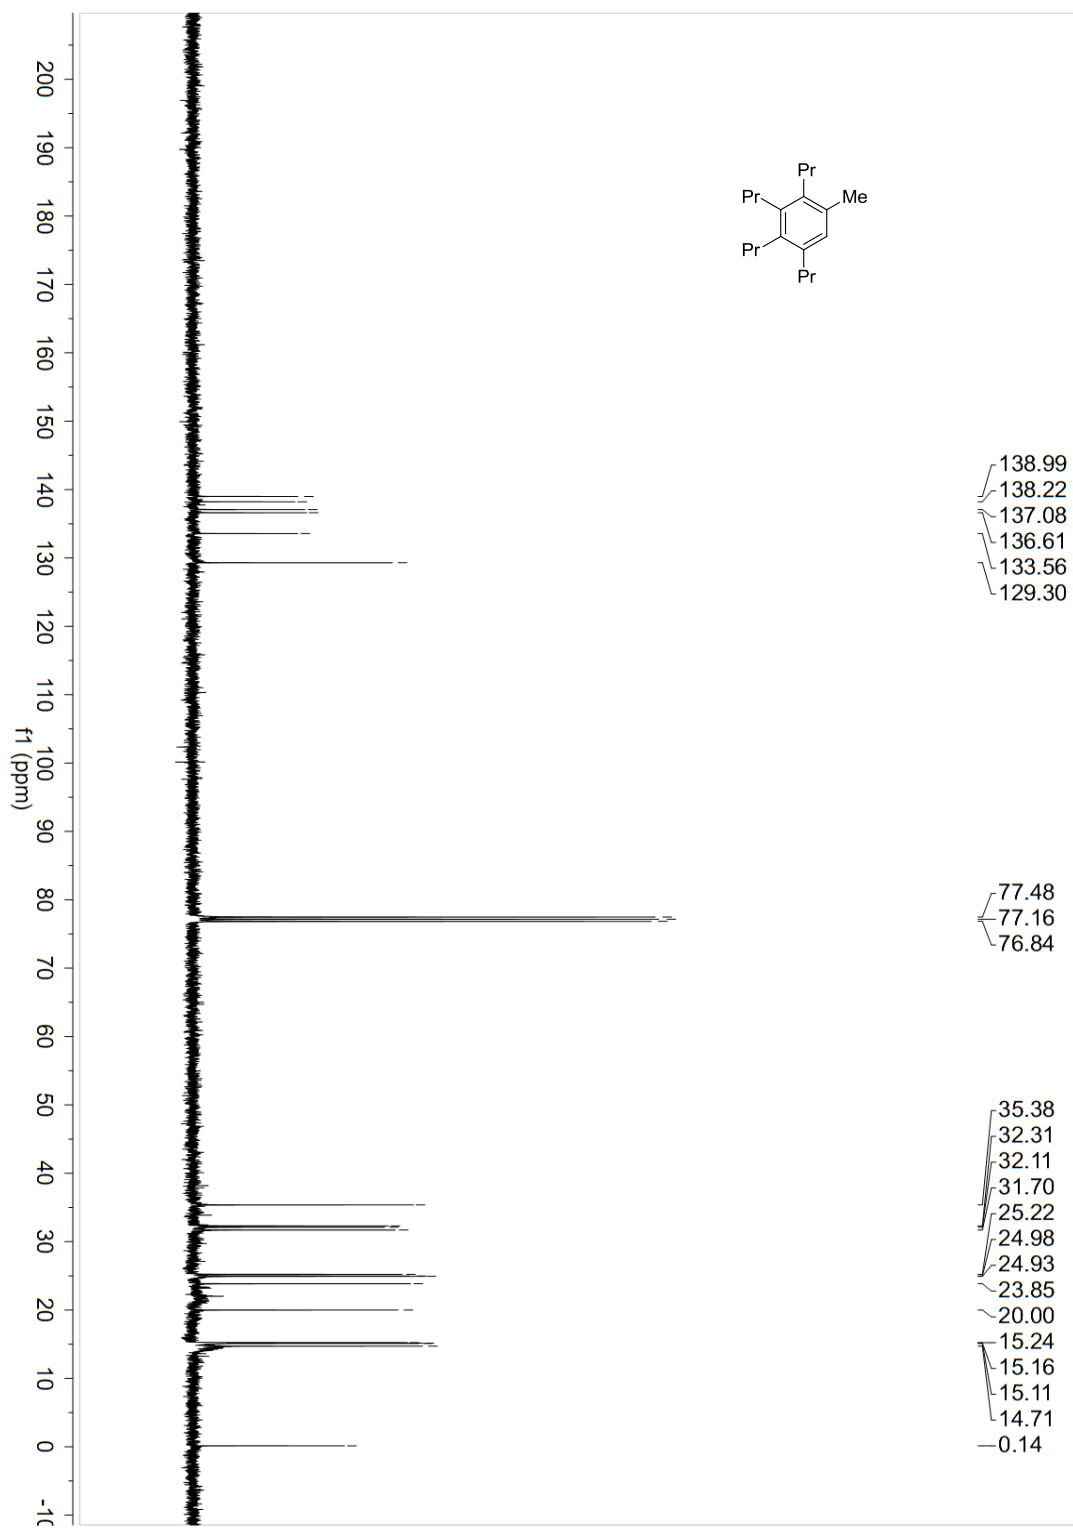

8b

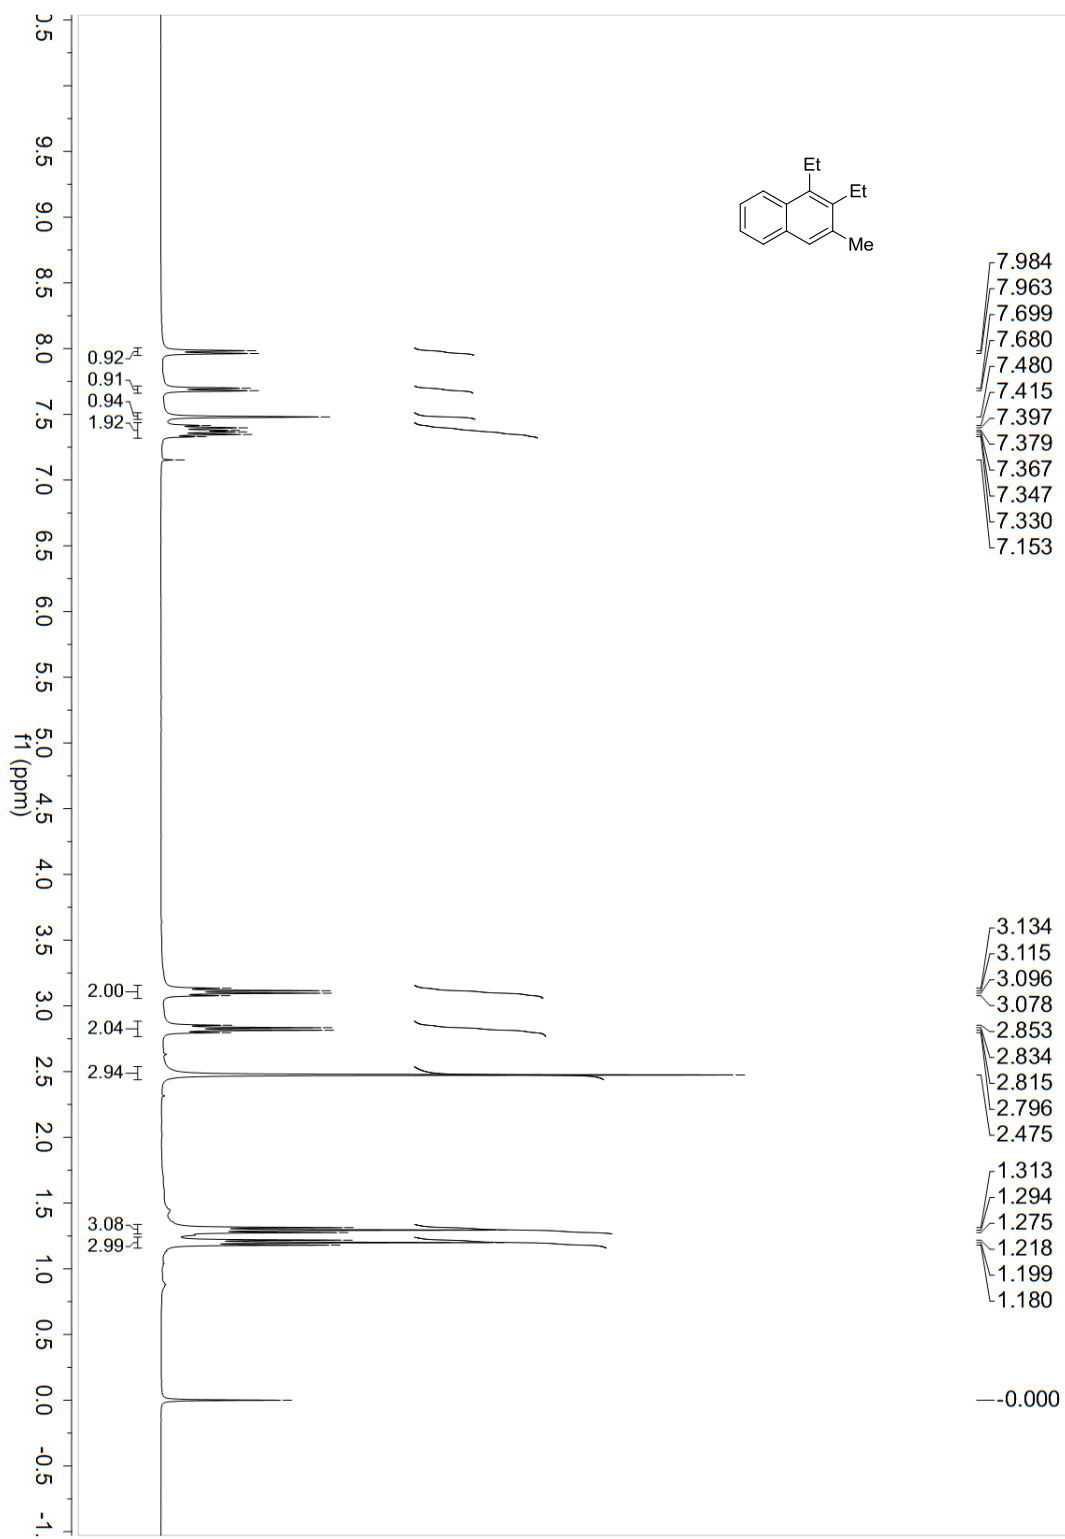

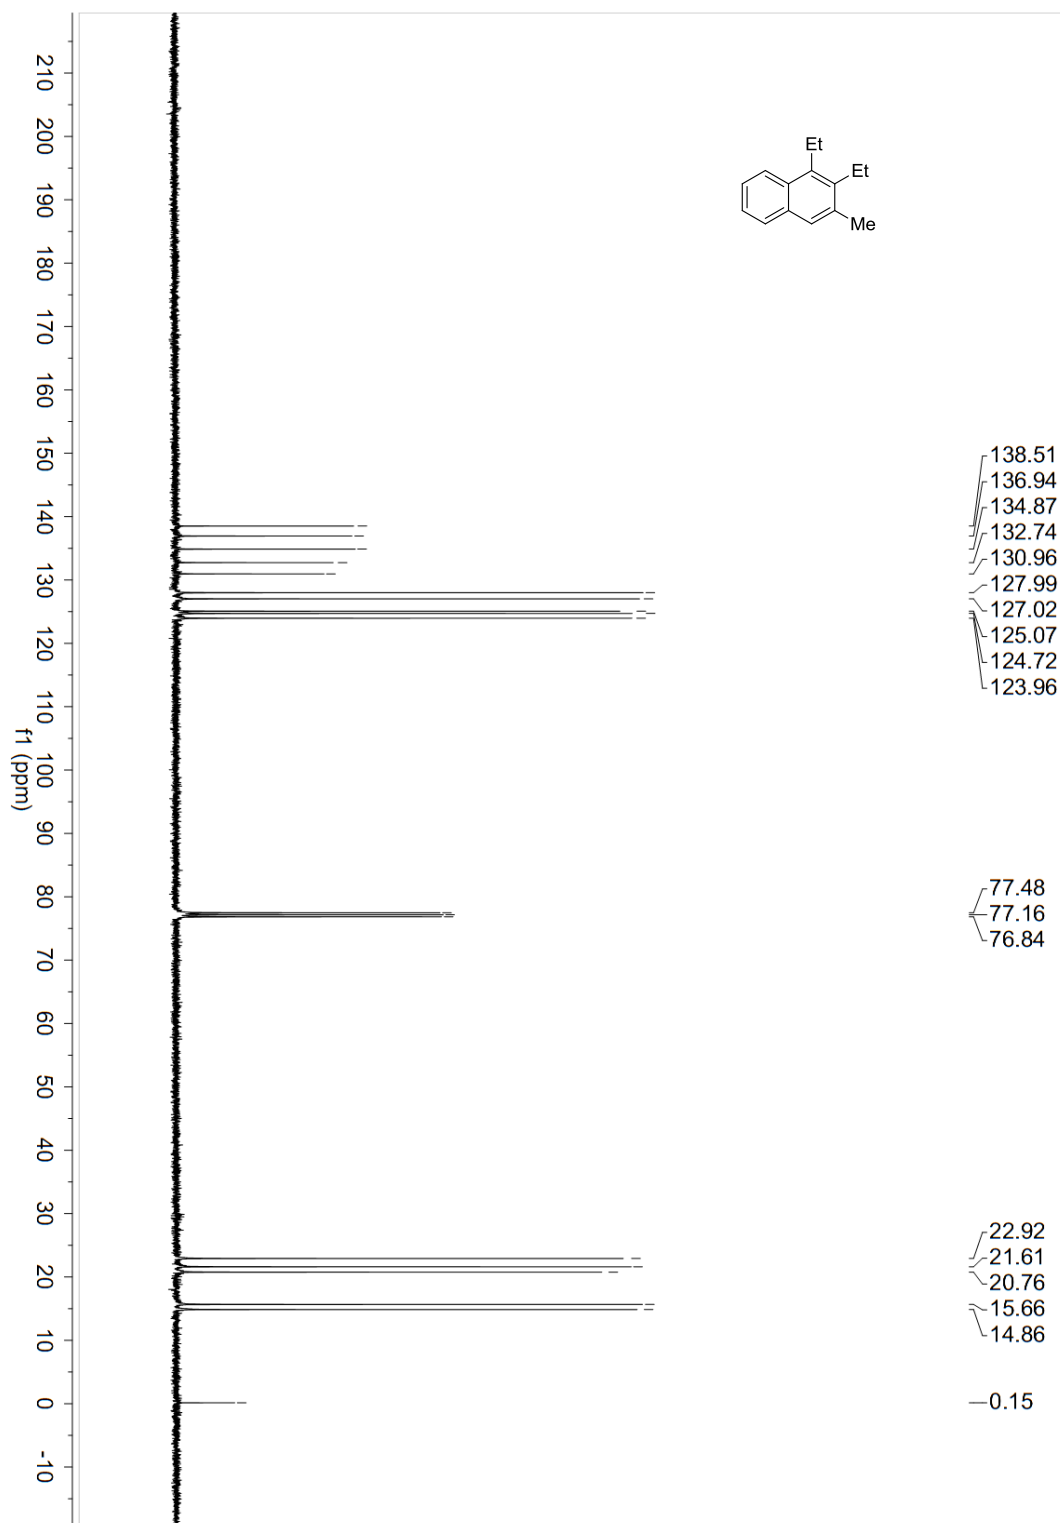

9a1

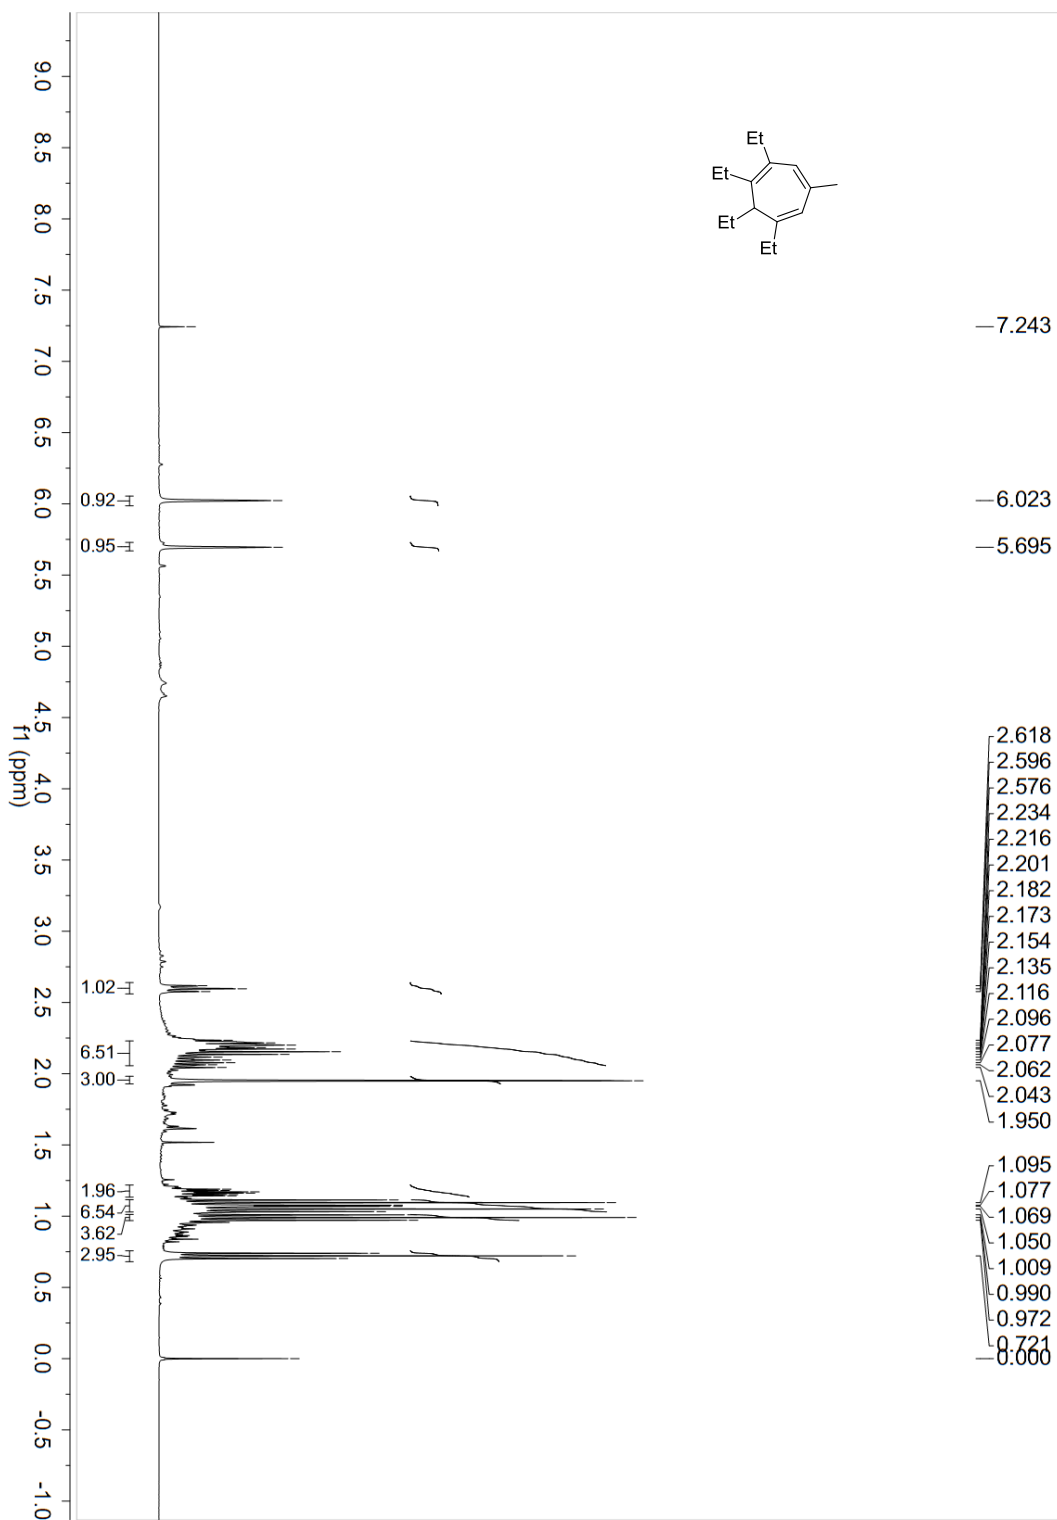

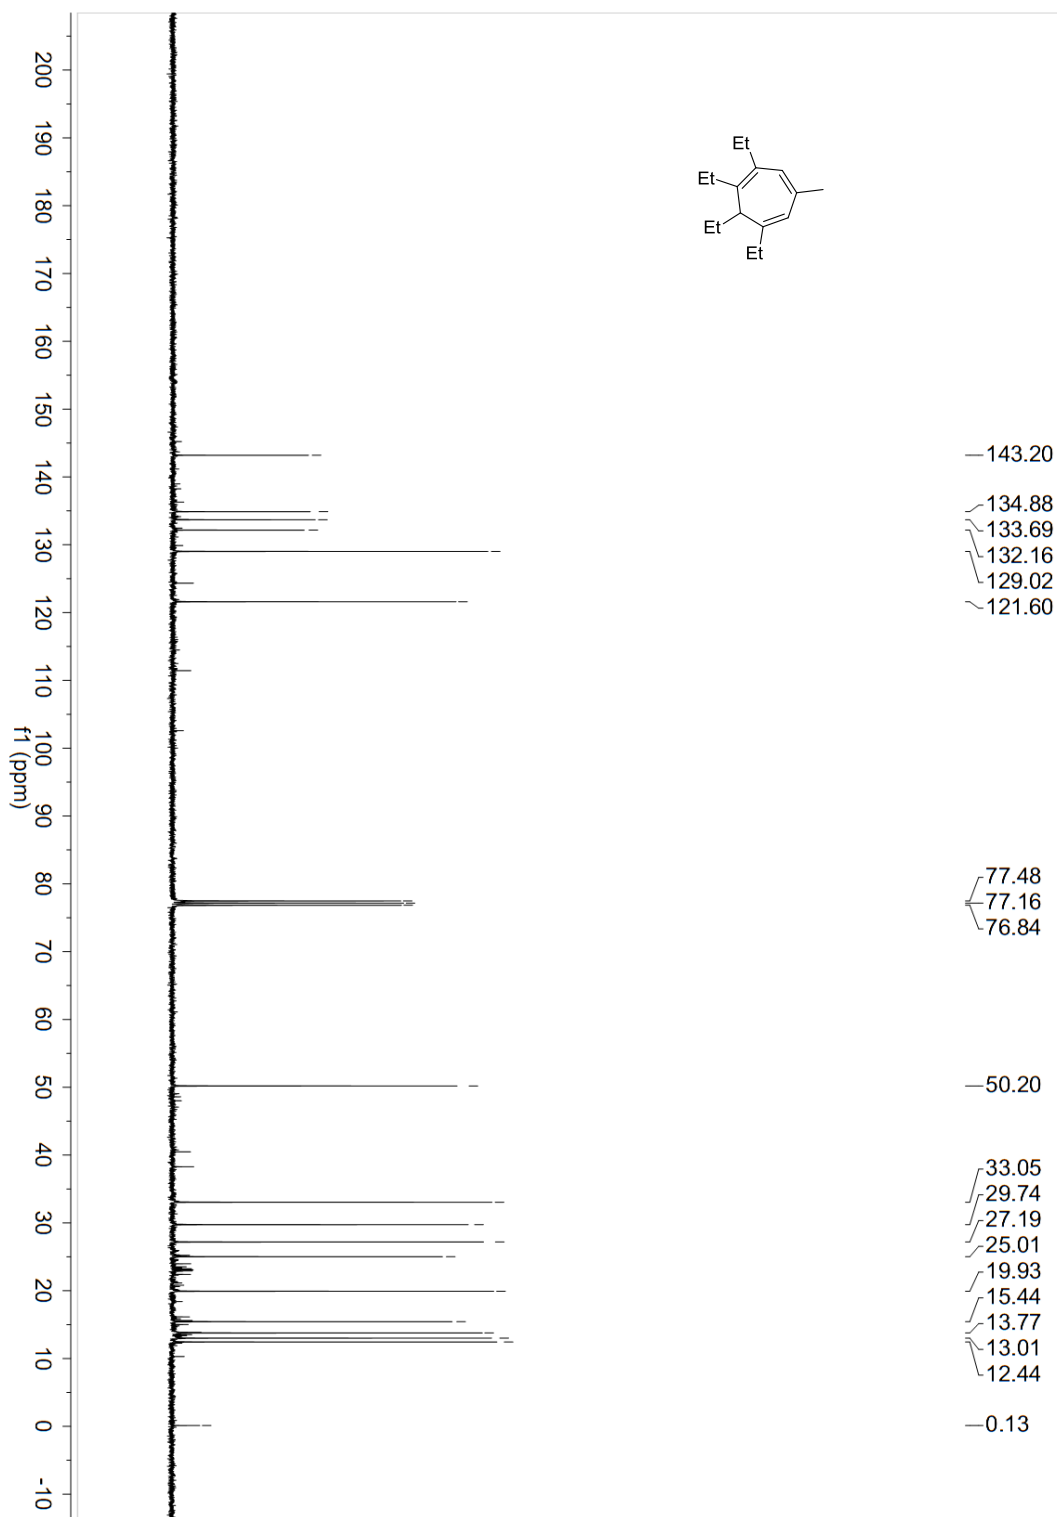



9a2

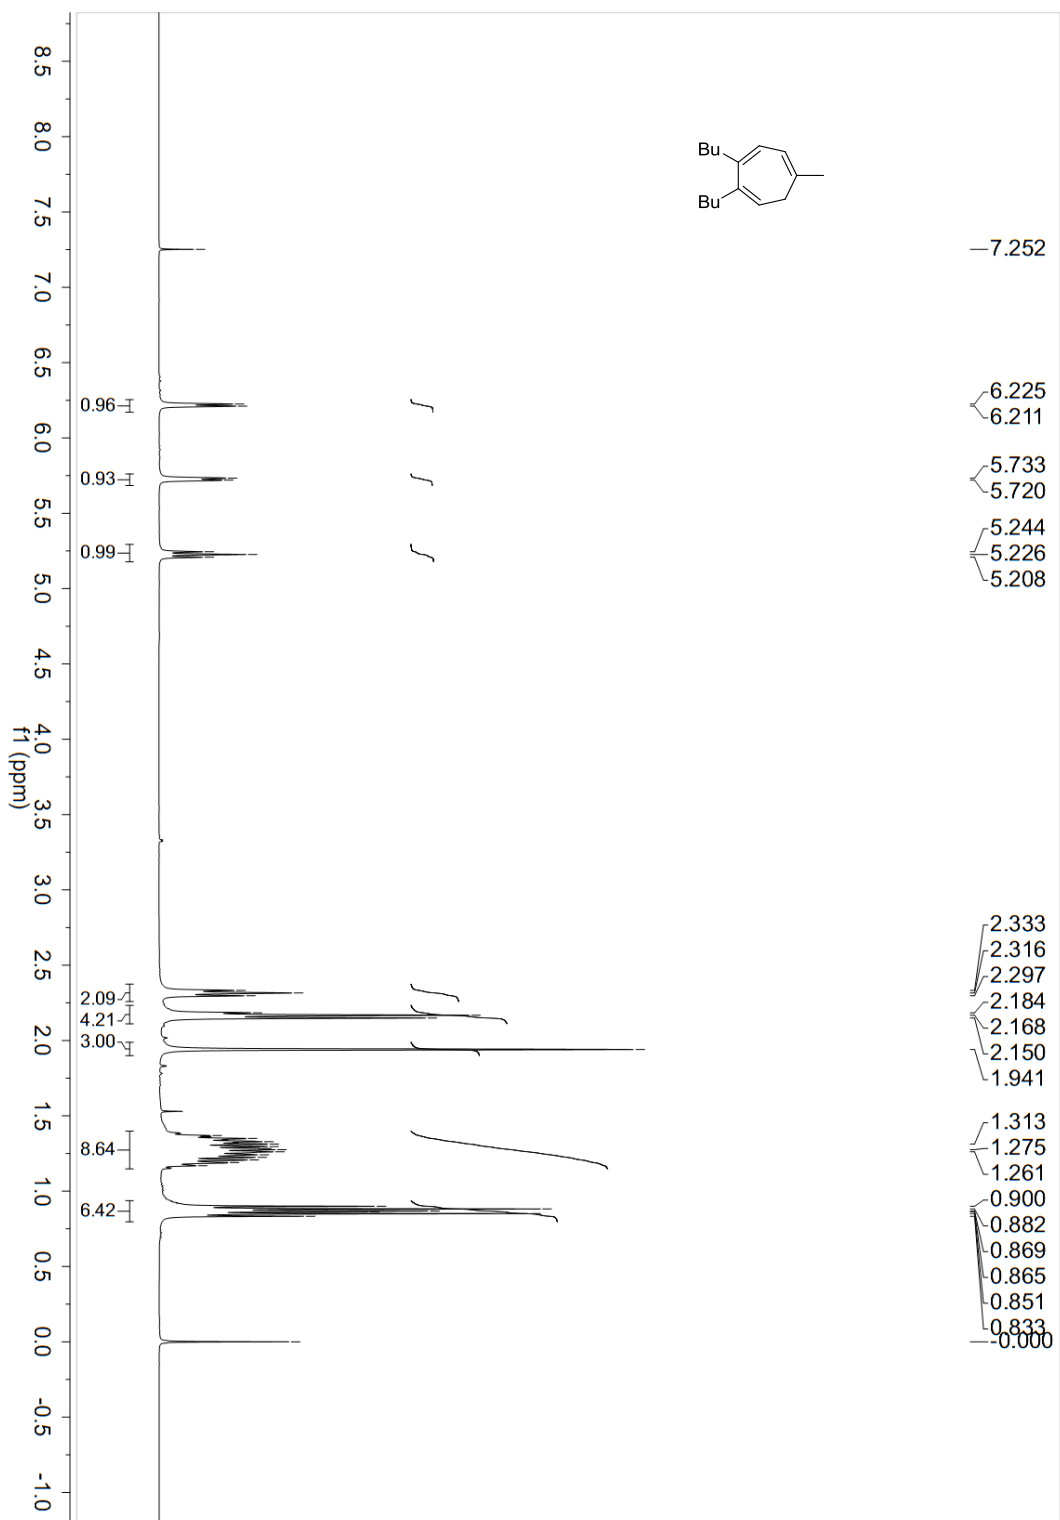

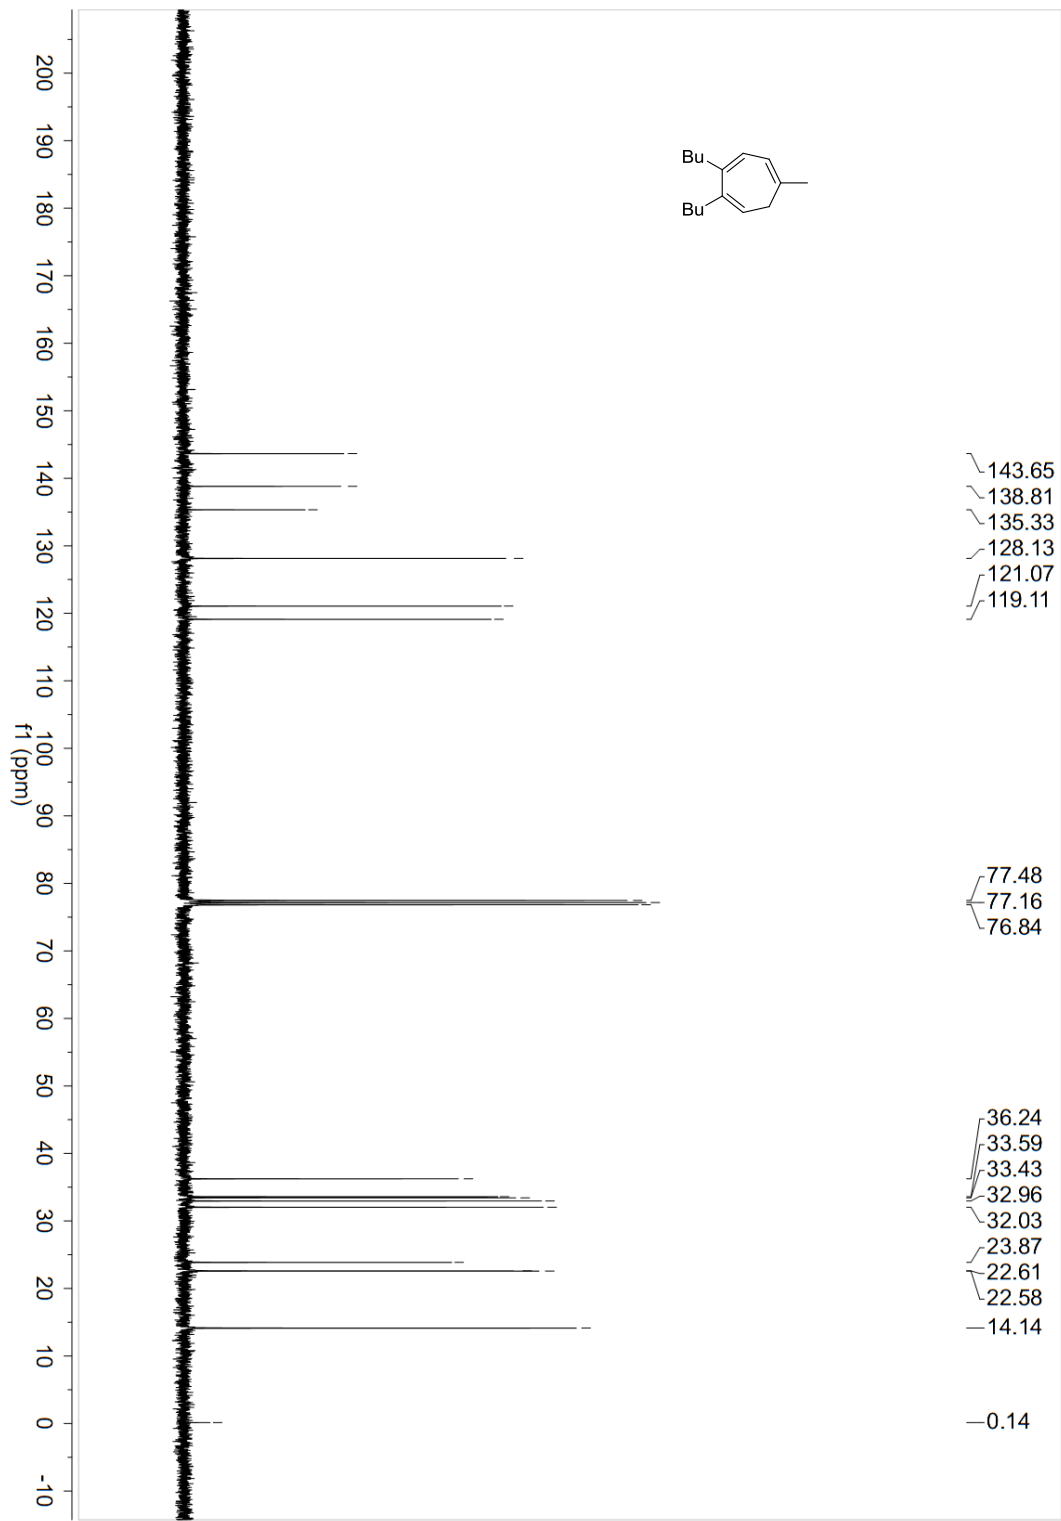

9b1

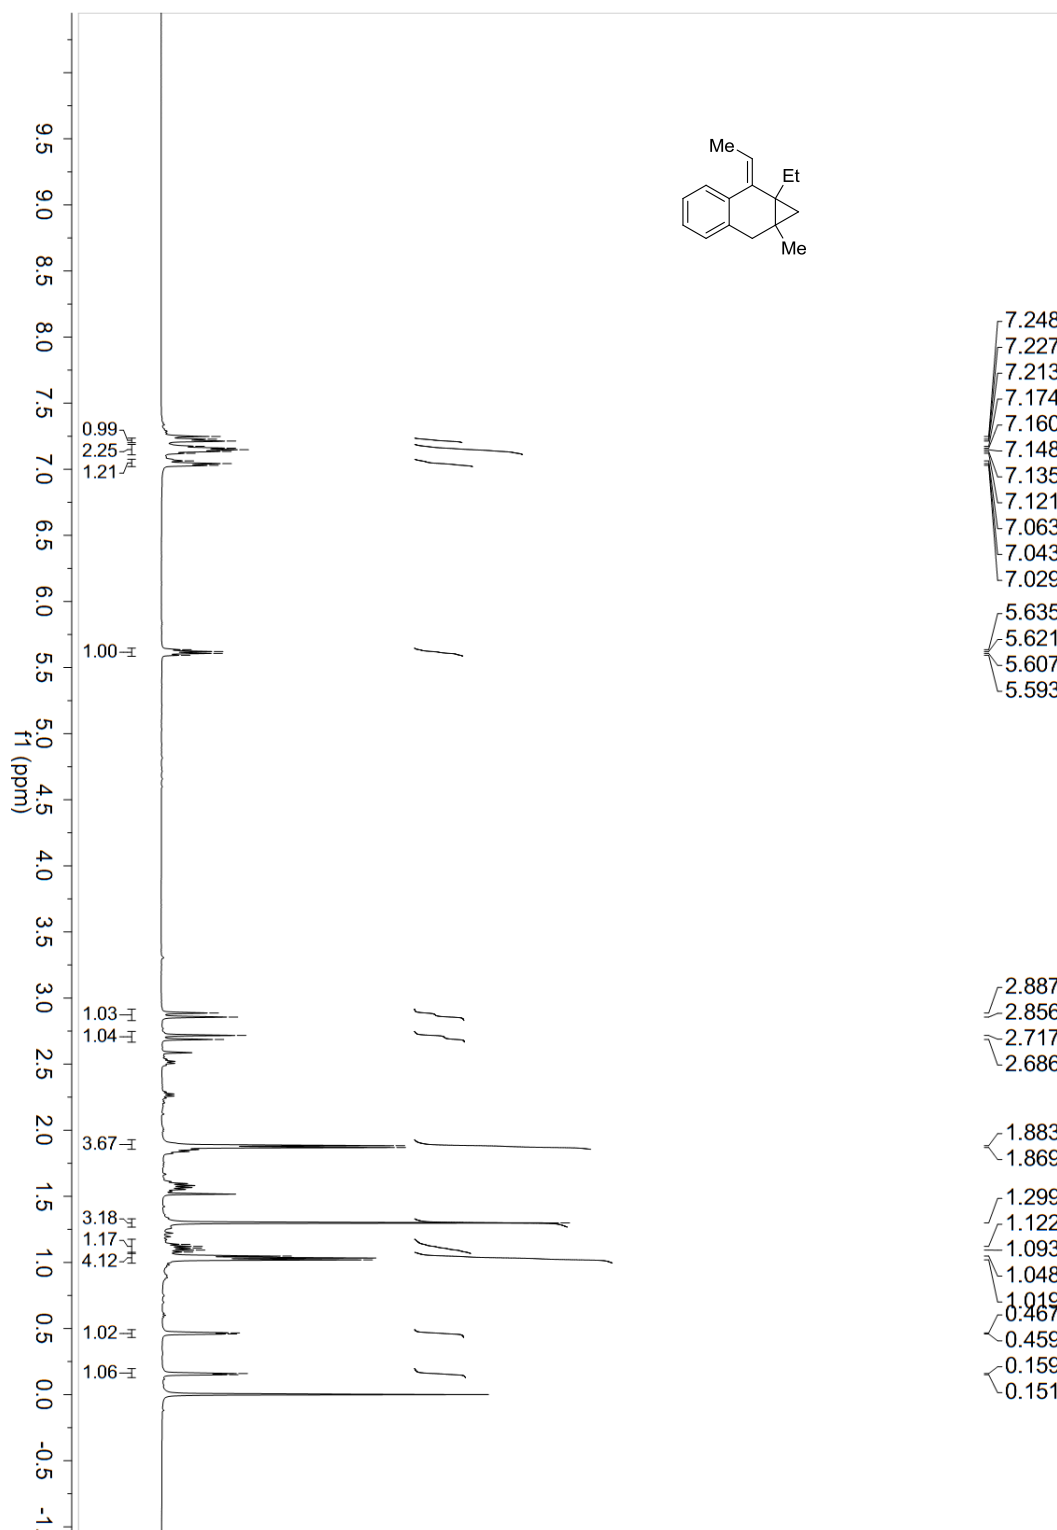

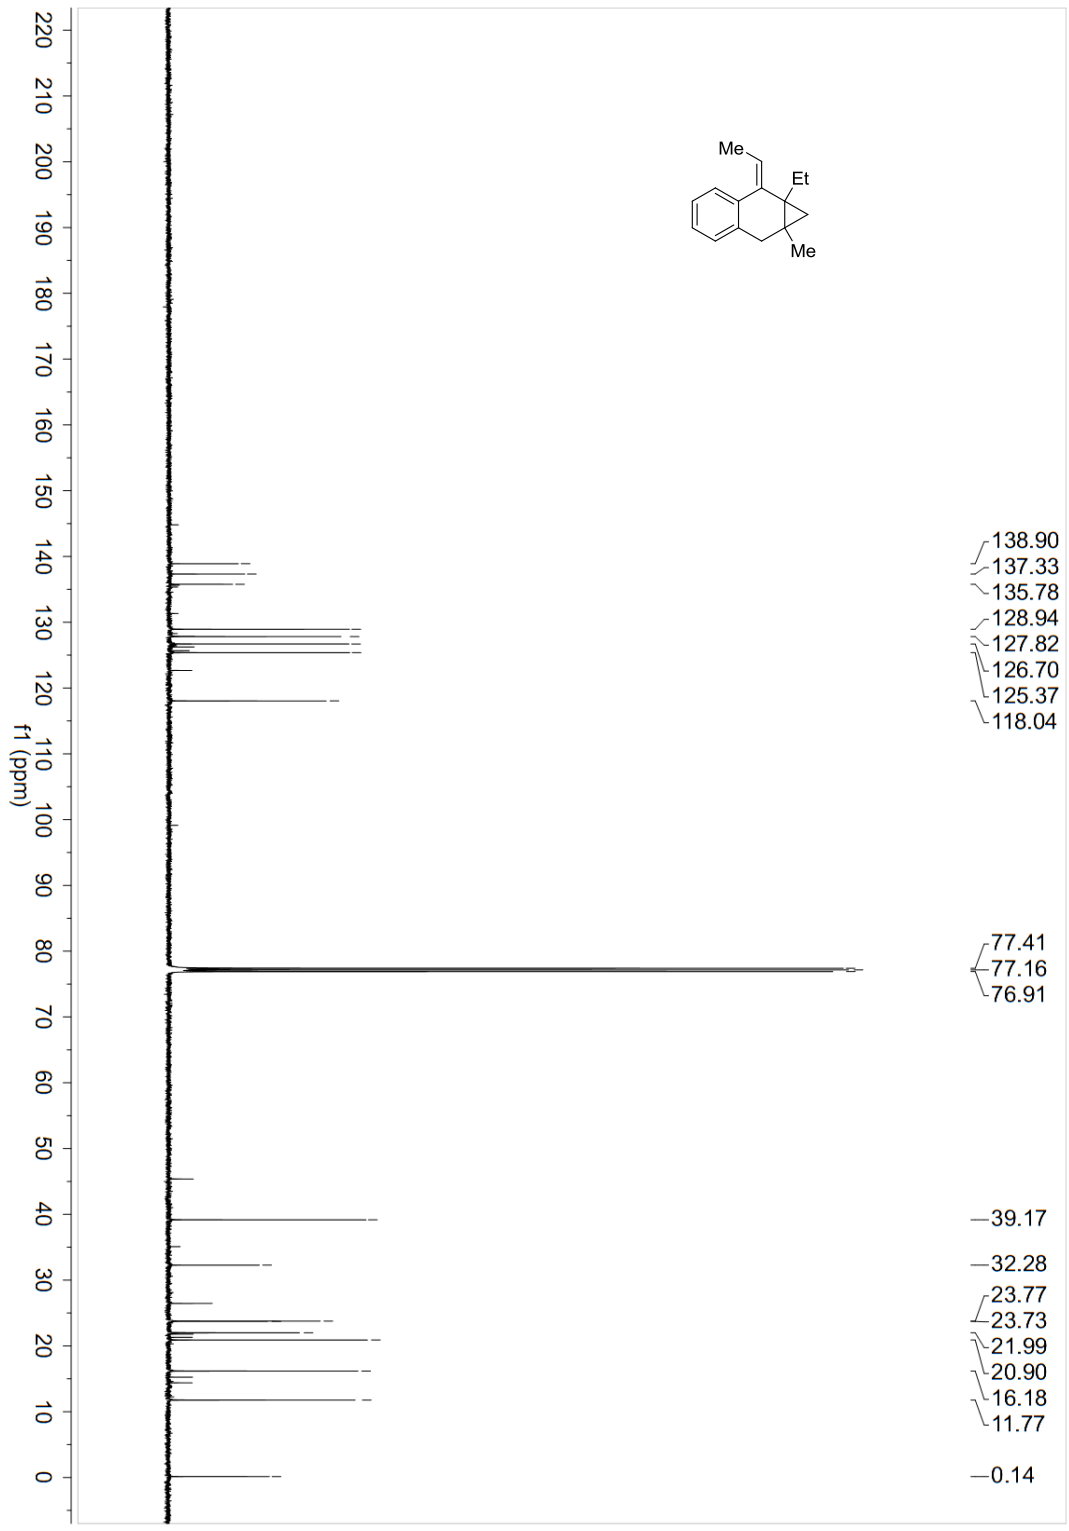

9b2

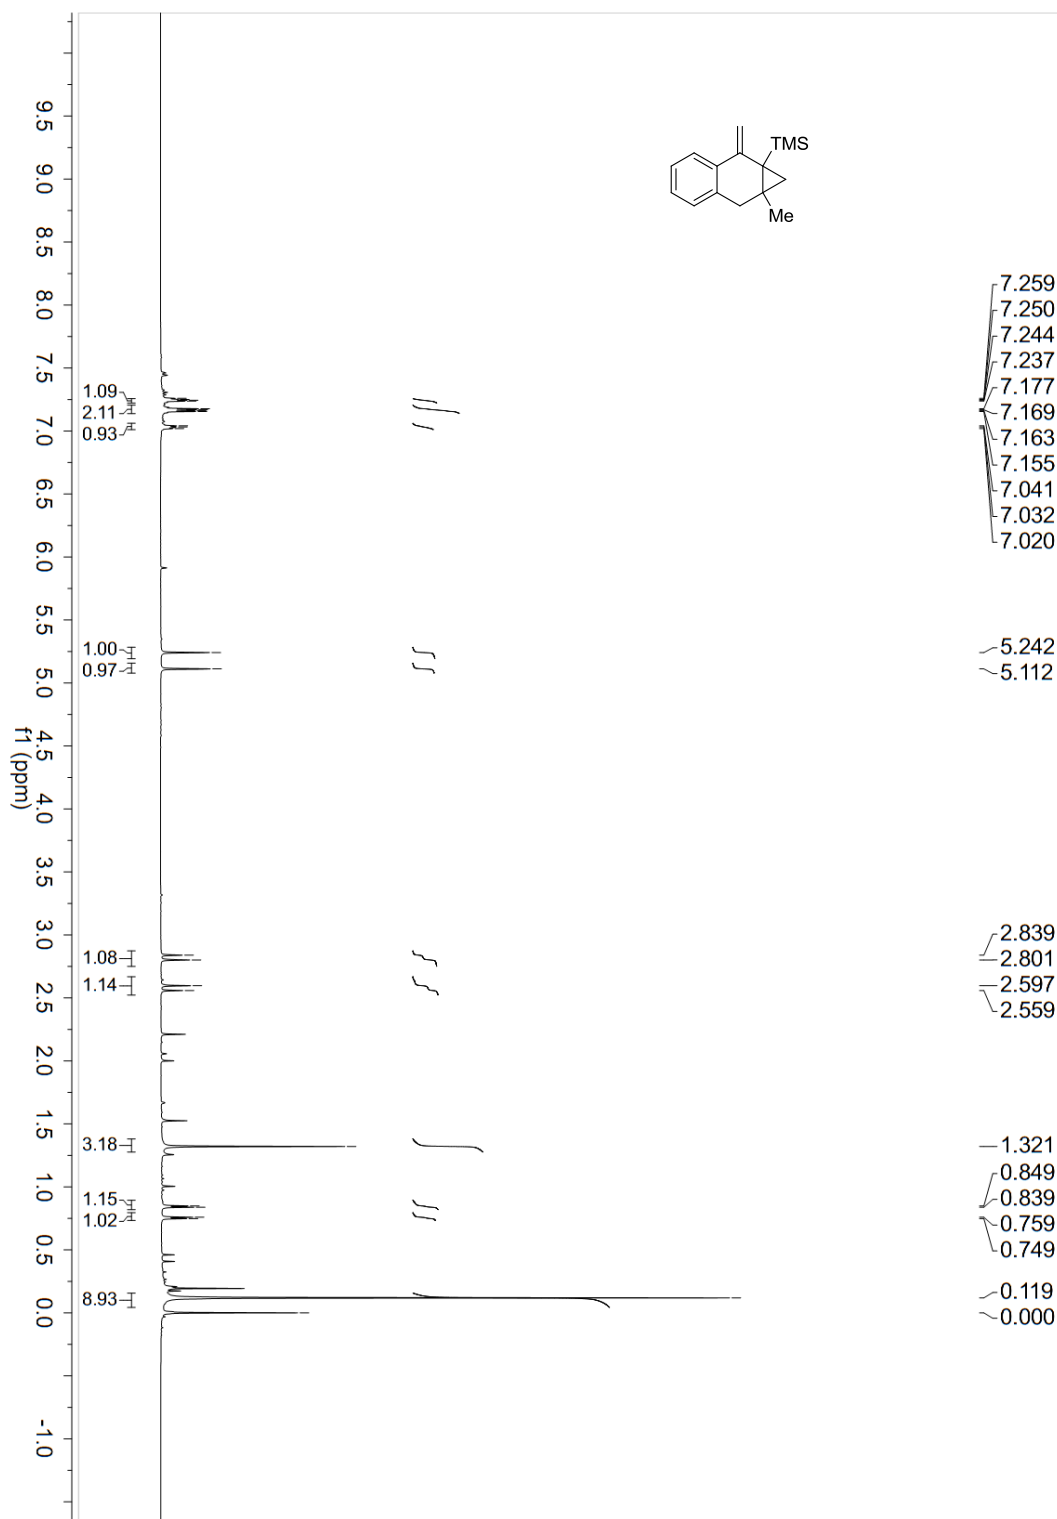

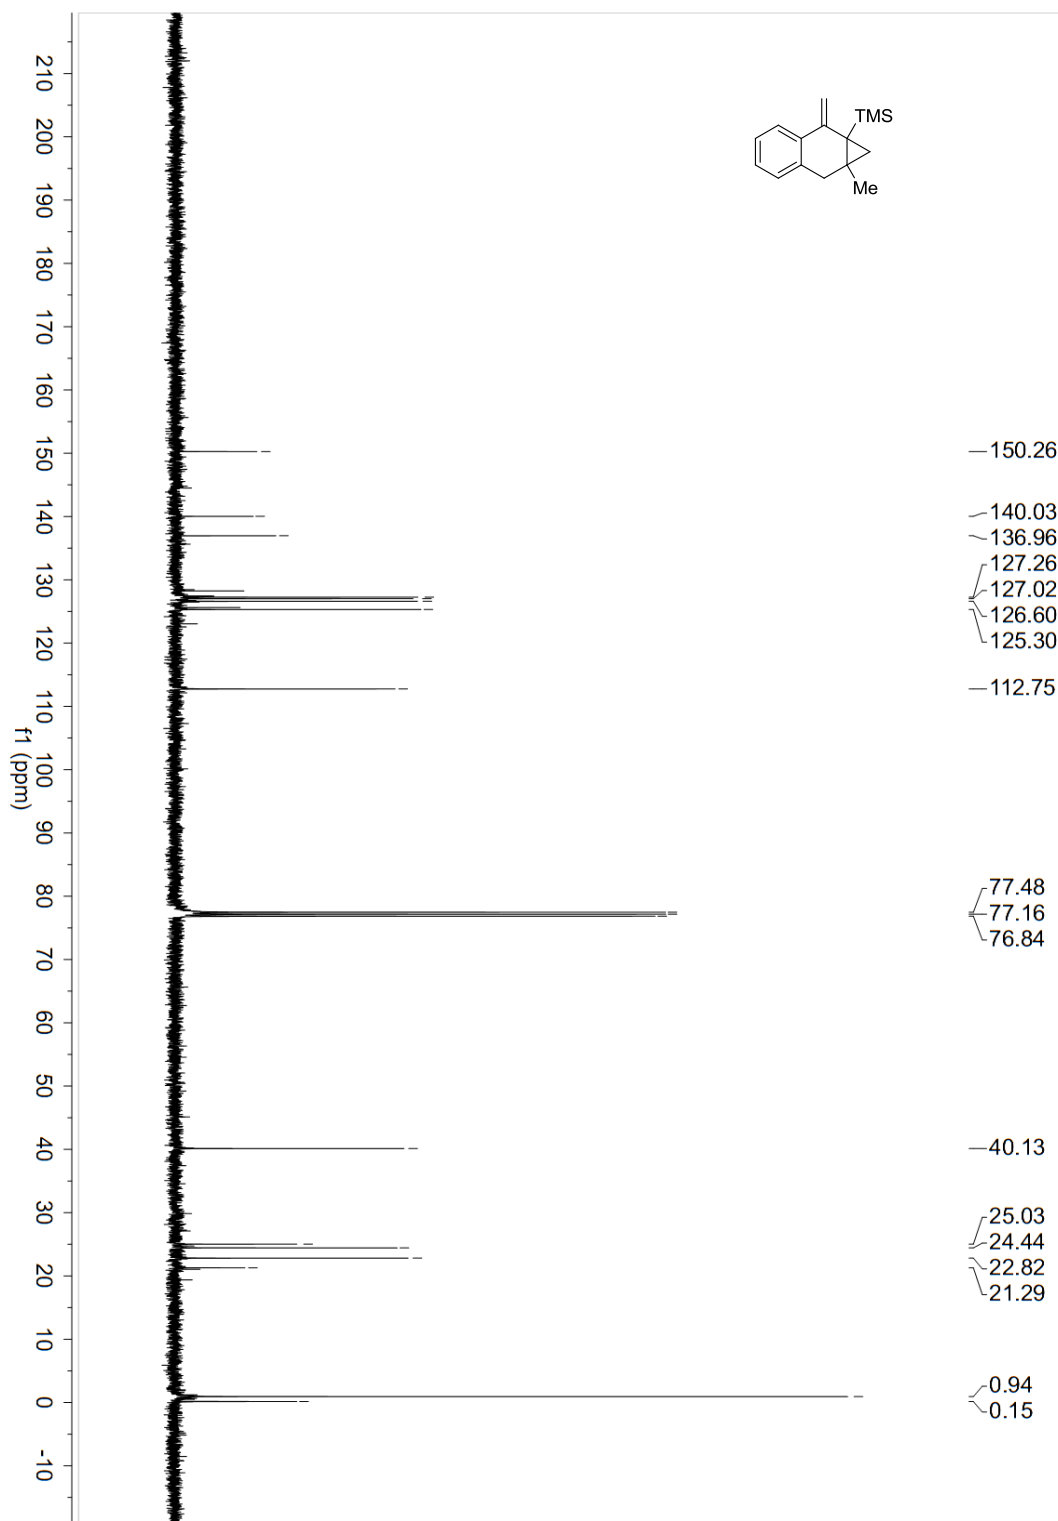

10

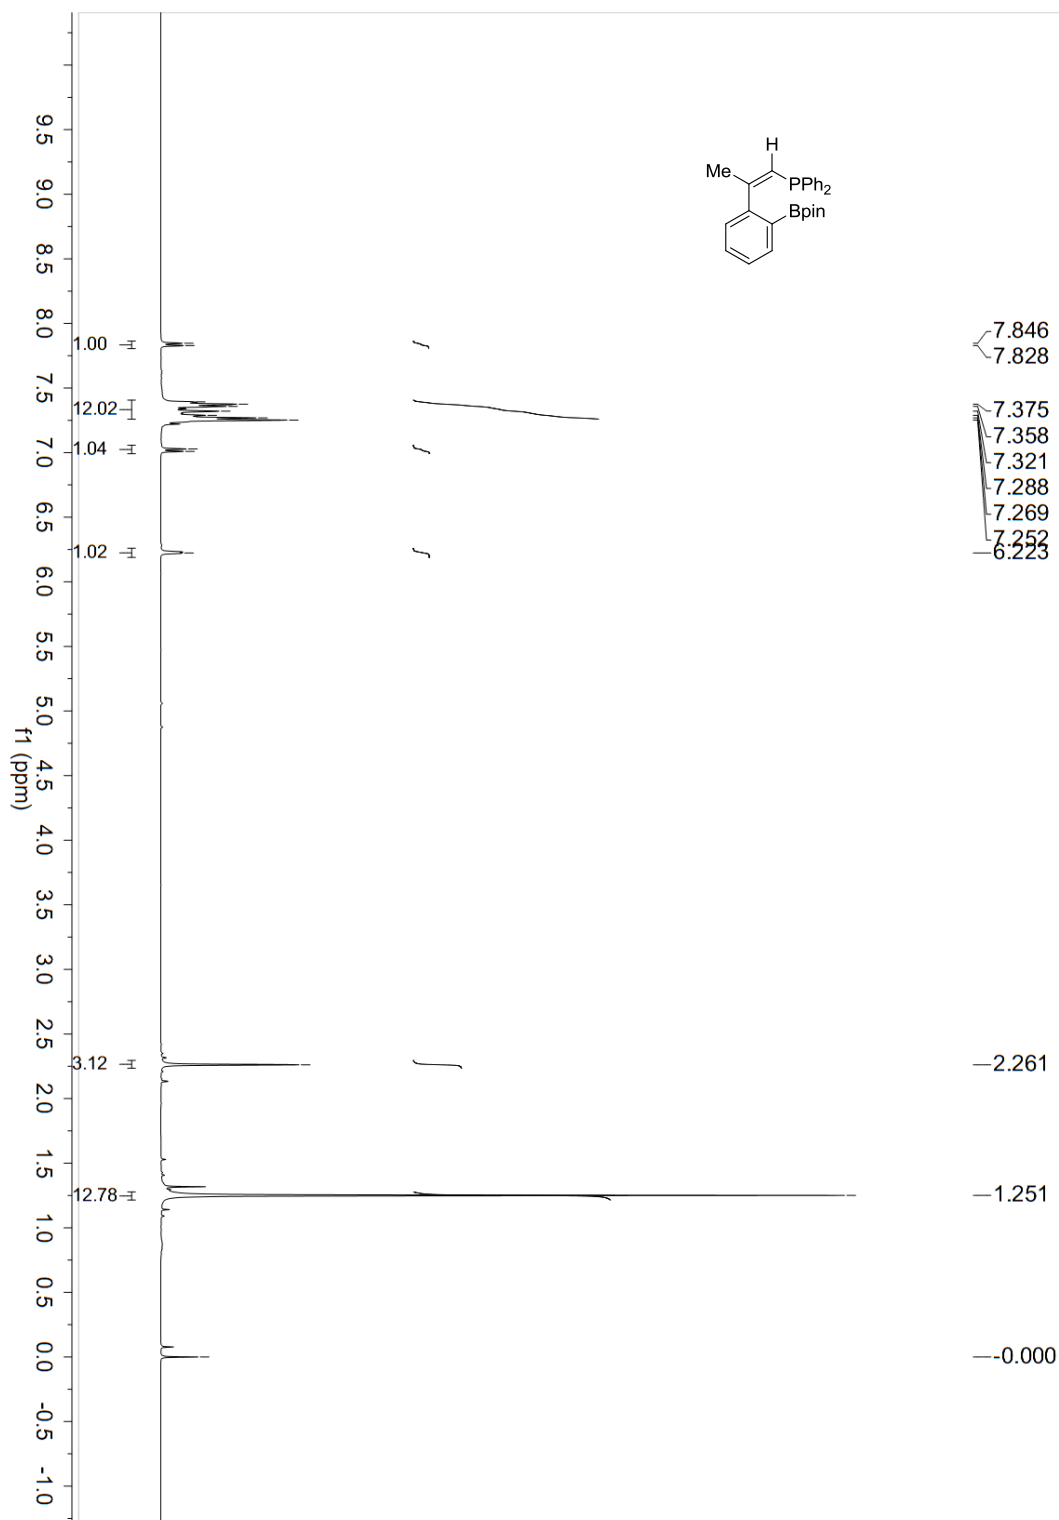

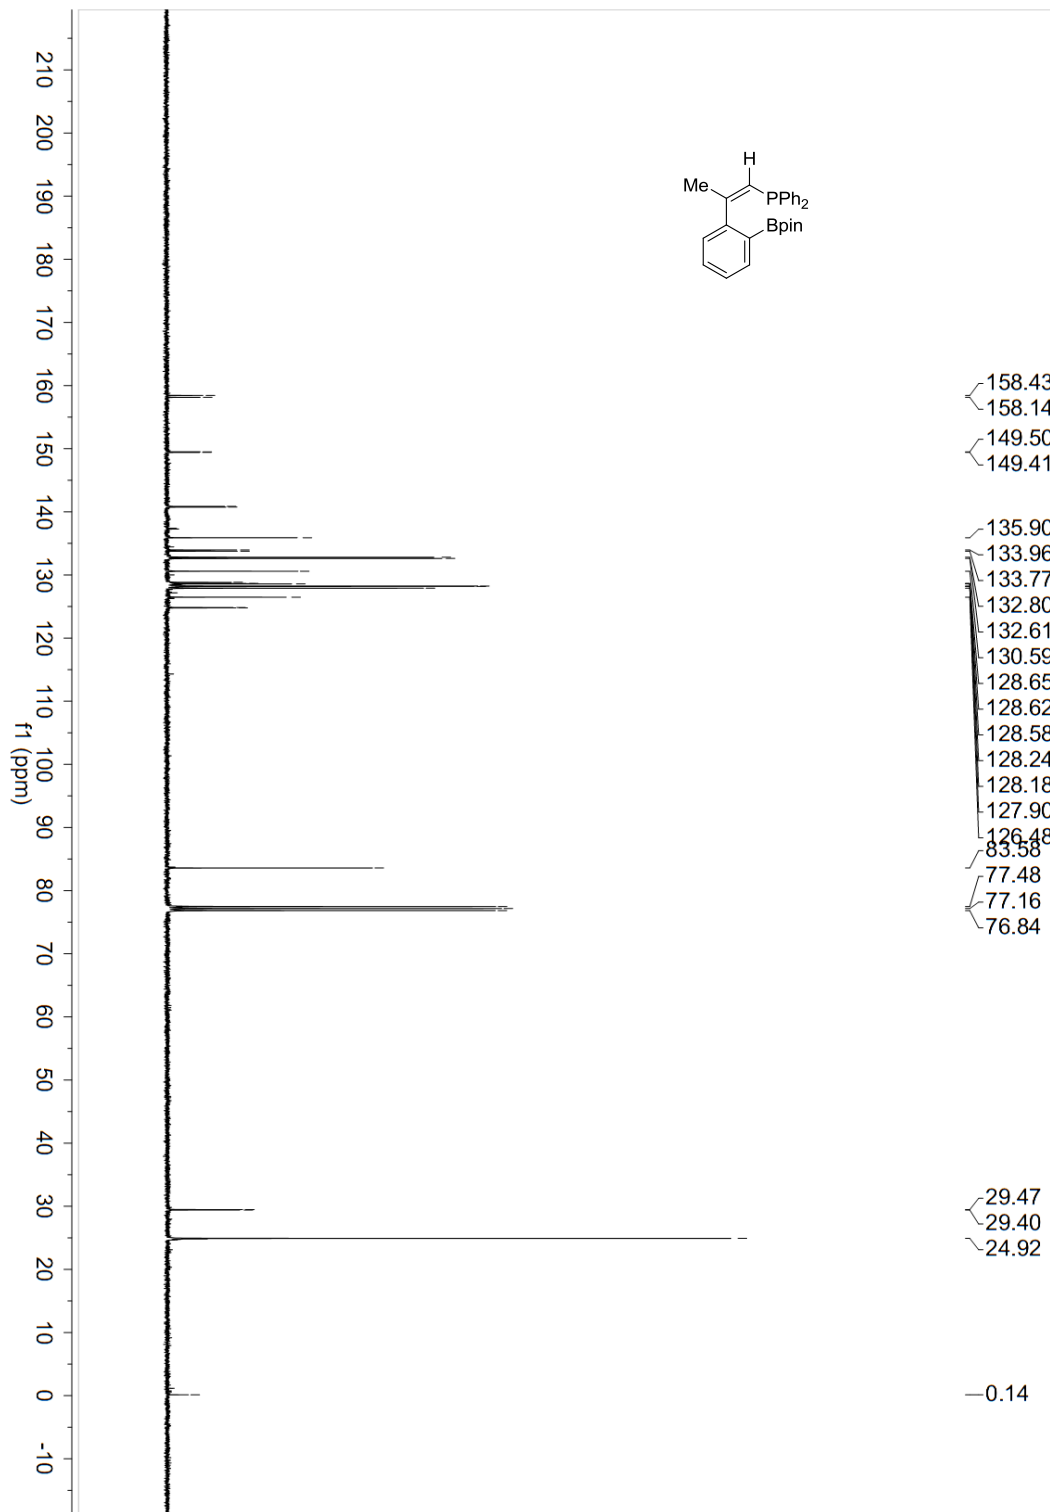



### 3) References

- [1] For the preparation of 1,3-dienes and diiodo analogues, see: a) S. L. Buchwald, B. T. Watson, J. C. Huffman, *J. Am. Chem. Soc.* **1987**, *109*, 2544-2546; b) T. Takahashi, M. Kageyama, V. Denisov, R. Hara, E. Negishi, *Tetrahedron Lett.* **1993**, *34*, 687-690; c) Z. Xi, R. Hara, T. Takahashi, *J. Org. Chem.* **1995**, *60*, 4444-4448; d) T. Hamada, D. Suzuki, H. Urabe, F. Sato, *J. Am. Chem. Soc.* **1999**, *121*, 7342-7344.
- [2] For other synthetic methods of **2a1** and **2a2**, see: T. Takahashi, W.-H. Sun, C. Xi, U. Haruka, Z. Xi. *Tetrahedron*, **1998**, *54*, 715-726.
- [3] G. M. Sheldrick, SHELXTL 5.10 for Windows NT: *Structure Determination Software Programs*; Bruker Analytical X-ray Systems, Inc.: Madison, WI, **1997**.
